# Supplementary material
Source: publisher site journal article supplement (https://www.spandidos-publications.com/6047/downloadSupplementary)
Supplement: Supplementary file 1 [file downloadSupplementary]

## Sheet: VHL and KDR
Table SI. Summary of mutations in the VHL and KDR genes in all types of cancer retrieved from the gnomAD database.
	Position	rsIDs	Reference	Alternate	HGVS Consequence	Protein Consequence	Transcript Consequence	VEP Annotation
VHL
1	10183459	rs1034934219	C	T	c.-73C>T		c.-73C>T	5_prime_UTR_variant
2	10183466	rs1349204335	C	G	c.-66C>G		c.-66C>G	5_prime_UTR_variant
3	10183466	rs1349204335	C	CTCCGCCCCGCG	c.-61_-51dupCCCCGCGTCCG		c.-61_-51dupCCCCGCGTCCG	5_prime_UTR_variant
4	10183468	rs772944298	C	T	c.-64C>T		c.-64C>T	5_prime_UTR_variant
5	10183474	rs1298211819	C	CGCGTCCGACCCGCGGATCCCGCG	c.-50_-28dupACCCGCGGATCCCGCGGCGTCCG		c.-50_-28dupACCCGCGGATCCCGCGGCGTCCG	5_prime_UTR_variant
6	10183476	rs1188845658	CG	C	c.-55delG		c.-55delG	5_prime_UTR_variant
7	10183481	rs916012789	G	T	c.-51G>T		c.-51G>T	5_prime_UTR_variant
8	10183481	rs916012789	G	A	c.-51G>A		c.-51G>A	5_prime_UTR_variant
9	10183485	rs745439844	C	A	c.-47C>A		c.-47C>A	5_prime_UTR_variant
10	10183485	rs745439844	C	T	c.-47C>T		c.-47C>T	5_prime_UTR_variant
11	10183487	rs372483939	C	A	c.-45C>A		c.-45C>A	5_prime_UTR_variant
12	10183487	rs372483939	C	T	c.-45C>T		c.-45C>T	5_prime_UTR_variant
13	10183488	rs929301467	G	T	c.-44G>T		c.-44G>T	5_prime_UTR_variant
14	10183492	rs1052005754	C	T	c.-40C>T		c.-40C>T	5_prime_UTR_variant
15	10183493	rs1411287388	C	A	c.-39C>A		c.-39C>A	5_prime_UTR_variant
16	10183495	rs1321343314	G	C	c.-37G>C		c.-37G>C	5_prime_UTR_variant
17	10183496	rs1349047110	C	G	c.-36C>G		c.-36C>G	5_prime_UTR_variant
18	10183497	rs587780992	G	C	c.-35G>C		c.-35G>C	5_prime_UTR_variant
19	10183497	rs587780992	G	A	c.-35G>A		c.-35G>A	5_prime_UTR_variant
20	10183499	rs913315877	CG	C	c.-32delG		c.-32delG	5_prime_UTR_variant
21	10183503	rs558788270	C	A	c.-29C>A		c.-29C>A	5_prime_UTR_variant
22	10183504	rs946136114	G	T	c.-28G>T		c.-28G>T	5_prime_UTR_variant
23	10183504	rs946136114	G	C	c.-28G>C		c.-28G>C	5_prime_UTR_variant
24	10183505	rs771880989	G	A	c.-27G>A		c.-27G>A	5_prime_UTR_variant
25	10183506	rs775446934	C	G	c.-26C>G		c.-26C>G	5_prime_UTR_variant
26	10183506	rs775446934	C	A	c.-26C>A		c.-26C>A	5_prime_UTR_variant
27	10183507	rs1340337531	C	T	c.-25C>T		c.-25C>T	5_prime_UTR_variant
28	10183507	rs1340337531	C	A	c.-25C>A		c.-25C>A	5_prime_UTR_variant
29	10183509	rs760414295	G	T	c.-23G>T		c.-23G>T	5_prime_UTR_variant
30	10183509	rs760414295	G	C	c.-23G>C		c.-23G>C	5_prime_UTR_variant
31	10183511	rs768453720	G	T	c.-21G>T		c.-21G>T	5_prime_UTR_variant
32	10183516	rs893572737	C	G	c.-16C>G		c.-16C>G	5_prime_UTR_variant
33	10183517	rs776768994	T	G	c.-15T>G		c.-15T>G	5_prime_UTR_variant
34	10183517	rs776768994	T	C	c.-15T>C		c.-15T>C	5_prime_UTR_variant
35	10183518	rs1271735513	G	A	c.-14G>A		c.-14G>A	5_prime_UTR_variant
36	10183519	rs1057522448	G	GATCGCGGAGGGAAT	p.Met1?	p.Met1?	c.-12_2dupATCGCGGAGGGAAT	5_prime_UTR_variant
37	10183519	rs1057522448	G	C	c.-13G>C		c.-13G>C	5_prime_UTR_variant
38	10183520	rs762831698	A	G	c.-12A>G		c.-12A>G	5_prime_UTR_variant
39	10183520	rs762831698	A	T	c.-12A>T		c.-12A>T	5_prime_UTR_variant
40	10183521	rs761938397	T	TCGCGGAGGGAATGC	p.Ala5GlufsTer14	p.Ala5GlufsTer14	c.-9_5dupGCGGAGGGAATGCC	5_prime_UTR_variant
41	10183521	rs761938397	T	C	c.-11T>C		c.-11T>C	5_prime_UTR_variant
42	10183522	rs1192379474	C	G	c.-10C>G		c.-10C>G	5_prime_UTR_variant
43	10183525	rs1476205556	G	T	c.-7G>T		c.-7G>T	5_prime_UTR_variant
44	10183527	rs35793832	A	C	c.-5A>C		c.-5A>C	5_prime_UTR_variant
45	10183530	rs937566924	G	T	c.-2G>T		c.-2G>T	5_prime_UTR_variant
46	10183531	rs1165233721	A	T	c.-1A>T		c.-1A>T	5_prime_UTR_variant
47	10183532	rs1060503557	A	T	p.Met1?	p.Met1?	c.1A>T	start_lost
48	10183534	rs578091032	G	A	p.Met1?	p.Met1?	c.3G>A	start_lost
49	10183534	rs578091032	G	T	p.Met1?	p.Met1?	c.3G>T	start_lost
50	10183535	rs1034974221	C	T	p.Pro2Ser	p.Pro2Ser	c.4C>T	missense_variant
51	10183536	rs111246617	C	G	p.Pro2Arg	p.Pro2Arg	c.5C>G	missense_variant
52	10183536	rs111246617	C	T	p.Pro2Leu	p.Pro2Leu	c.5C>T	missense_variant
53	10183537	rs1014417508	C	CCGGG	p.Arg4AlafsTer24	p.Arg4AlafsTer24	c.9_10insGCGG	frameshift_variant
54	10183539	rs1178481595	G	GGAGGGCGGAGAACTGGGAC	p.Ala11GlyfsTer22	p.Ala11GlyfsTer22	c.13_31dupGCGGAGAACTGGGACGAGG	frameshift_variant
55	10183547	rs545406510	G	A	p.Glu6Lys	p.Glu6Lys	c.16G>A	missense_variant
56	10183552	rs1060503561	C	A	p.Asn7Lys	p.Asn7Lys	c.21C>A	missense_variant
57	10183553	rs1352171735	T	C	p.Trp8Arg	p.Trp8Arg	c.22T>C	missense_variant
58	10183556	rs587780730	G	A	p.Asp9Asn	p.Asp9Asn	c.25G>A	missense_variant
59	10183556	rs587780730	G	T	p.Asp9Tyr	p.Asp9Tyr	c.25G>T	missense_variant
60	10183558	rs1017141110	C	T	p.Asp9Asp	p.Asp9Asp	c.27C>T	synonymous_variant
61	10183558	rs1017141110	C	A	p.Asp9Glu	p.Asp9Glu	c.27C>A	missense_variant
62	10183559	rs1057519261	G	A	p.Glu10Lys	p.Glu10Lys	c.28G>A	missense_variant
63	10183562	rs1236604706	G	C	p.Ala11Pro	p.Ala11Pro	c.31G>C	missense_variant
64	10183565	rs1064794788	G	C	p.Glu12Gln	p.Glu12Gln	c.34G>C	missense_variant
65	10183565	rs1064794788	G	T	p.Glu12Ter	p.Glu12Ter	c.34G>T	stop_gained
66	10183566	rs1380706798	A	T	p.Glu12Val	p.Glu12Val	c.35A>T	missense_variant
67	10183568	rs919338576	G	A	p.Val13Ile	p.Val13Ile	c.37G>A	missense_variant
68	10183569		T	TAGGCGCGGAGGAGGC	p.Ala15_Gly19dup	p.Ala15_Gly19dup	c.44_58dupCGGAGGAGGCAGGCG	inframe_insertion
69	10183569		T	G	p.Val13Gly	p.Val13Gly	c.38T>G	missense_variant
70	10183570	rs996469746	A	G	p.Val13Val	p.Val13Val	c.39A>G	synonymous_variant
71	10183571	rs1060503559	G	C	p.Gly14Arg	p.Gly14Arg	c.40G>C	missense_variant
72	10183577	rs1060503556	G	C	p.Glu16Gln	p.Glu16Gln	c.46G>C	missense_variant
73	10183579	rs1057522140	G	A	p.Glu16Glu	p.Glu16Glu	c.48G>A	synonymous_variant
74	10183586	rs1382387188	G	A	p.Gly19Ser	p.Gly19Ser	c.55G>A	missense_variant
75	10183602	rs878854129	G	A	p.Gly24Asp	p.Gly24Asp	c.71G>A	missense_variant
76	10183605	rs35460768	C	T	p.Pro25Leu	p.Pro25Leu	c.74C>T	missense_variant
77	10183615	rs1198287627	C	G	p.Asp28Glu	p.Asp28Glu	c.84C>G	missense_variant
78	10183616	rs1277221408	G	A	p.Gly29Ser	p.Gly29Ser	c.85G>A	missense_variant
79	10183616	rs1277221408	G	C	p.Gly29Arg	p.Gly29Arg	c.85G>C	missense_variant
80	10183619	rs913104799	G	A	p.Gly30Arg	p.Gly30Arg	c.88G>A	missense_variant
81	10183620	rs1064793290	G	A	p.Gly30Glu	p.Gly30Glu	c.89G>A	missense_variant
82	10183621	rs391818	G	GGAGGAGTCGGGCGCC	p.Ala35_Gly39dup	p.Ala35_Gly39dup	c.99_113dupGGGCGCCGAGGAGTC	inframe_insertion
83	10183624	rs1438911242	G	C	p.Glu31Asp	p.Glu31Asp	c.93G>C	missense_variant
84	10183626	rs786203104	A	G	p.Glu32Gly	p.Glu32Gly	c.95A>G	missense_variant
85	10183627	rs1365536227	G	A	p.Glu32Glu	p.Glu32Glu	c.96G>A	synonymous_variant
86	10183629	rs1476994915	C	A	p.Ser33Ter	p.Ser33Ter	c.98C>A	stop_gained
87	10183629	rs1476994915	C	T	p.Ser33Leu	p.Ser33Leu	c.98C>T	missense_variant
88	10183630	rs912159589	G	C	p.Ser33Ser	p.Ser33Ser	c.99G>C	synonymous_variant
89	10183633	rs967421751	C	T	p.Gly34Gly	p.Gly34Gly	c.102C>T	synonymous_variant
90	10183635	rs587780536	C	T	p.Ala35Val	p.Ala35Val	c.104C>T	missense_variant
91	10183639	rs1397870099	G	GGAGTCCGGCCCGGAA	p.Ser43_Glu47dup	p.Ser43_Glu47dup	c.123_137dupAGAGTCCGGCCCGGA	inframe_insertion
92	10183639	rs1397870099	G	A	p.Glu36Glu	p.Glu36Glu	c.108G>A	synonymous_variant
93	10183639	rs1397870099	GGAGTCCGGCCCGGAA	G	p.Ser43_Glu47del	p.Ser43_Glu47del	c.123_137delAGAGTCCGGCCCGGA	inframe_deletion
94	10183640	rs1338996432	G	A	p.Glu37Lys	p.Glu37Lys	c.109G>A	missense_variant
95	10183642	rs1398333169	G	C	p.Glu37Asp	p.Glu37Asp	c.111G>C	missense_variant
96	10183643	rs779910104	T	G	p.Ser38Ala	p.Ser38Ala	c.112T>G	missense_variant
97	10183645	rs417164	C	T	p.Ser38Ser	p.Ser38Ser	c.114C>T	synonymous_variant
98	10183646	rs768650092	G	C	p.Gly39Arg	p.Gly39Arg	c.115G>C	missense_variant
99	10183646	rs768650092	G	A	p.Gly39Ser	p.Gly39Ser	c.115G>A	missense_variant
100	10183649	rs776399733	C	A	p.Pro40Thr	p.Pro40Thr	c.118C>A	missense_variant
101	10183649	rs776399733	C	T	p.Pro40Ser	p.Pro40Ser	c.118C>T	missense_variant
102	10183650	rs200343185	C	T	p.Pro40Leu	p.Pro40Leu	c.119C>T	missense_variant
103	10183660	rs864622645	C	T	p.Ser43Ser	p.Ser43Ser	c.129C>T	synonymous_variant
104	10183665	rs199583685	C	G	p.Pro45Arg	p.Pro45Arg	c.134C>G	missense_variant
105	10183666	rs773519476	G	A	p.Pro45Pro	p.Pro45Pro	c.135G>A	synonymous_variant
106	10183670	rs1457039250	G	A	p.Glu47Lys	p.Glu47Lys	c.139G>A	missense_variant
107	10183674	rs199959170	T	G	p.Leu48Arg	p.Leu48Arg	c.143T>G	missense_variant
108	10183675	rs1172061775	G	C	p.Leu48Leu	p.Leu48Leu	c.144G>C	synonymous_variant
109	10183678	rs1449801595	C	T	p.Gly49Gly	p.Gly49Gly	c.147C>T	synonymous_variant
110	10183681	rs61751580	C	G	p.Ala50Ala	p.Ala50Ala	c.150C>G	synonymous_variant
111	10183685	rs373068386	G	T	p.Glu52Ter	p.Glu52Ter	c.154G>T	stop_gained
112	10183685	rs373068386	G	A	p.Glu52Lys	p.Glu52Lys	c.154G>A	missense_variant
113	10183697	rs1421828060	G	A	p.Ala56Thr	p.Ala56Thr	c.166G>A	missense_variant
114	10183698	rs752980085	C	G	p.Ala56Gly	p.Ala56Gly	c.167C>G	missense_variant
115	10183698	rs752980085	C	A	p.Ala56Asp	p.Ala56Asp	c.167C>A	missense_variant
116	10183699	rs864622714	C	G	p.Ala56Ala	p.Ala56Ala	c.168C>G	synonymous_variant
117	10183701	rs764755691	G	T	p.Gly57Val	p.Gly57Val	c.170G>T	missense_variant
118	10183702	rs750103719	G	T	p.Gly57Gly	p.Gly57Gly	c.171G>T	synonymous_variant
119	10183703	rs757781272	C	A	p.Arg58Arg	p.Arg58Arg	c.172C>A	synonymous_variant
120	10183703	rs757781272	C	T	p.Arg58Trp	p.Arg58Trp	c.172C>T	missense_variant
121	10183711	rs1224891387	G	A	p.Arg60Arg	p.Arg60Arg	c.180G>A	synonymous_variant
122	10183713	rs746582207	C	T	p.Pro61Leu	p.Pro61Leu	c.182C>T	missense_variant
123	10183714	rs63650860	C	G	p.Pro61Pro	p.Pro61Pro	c.183C>G	synonymous_variant
124	10183714	rs63650860	C	T	p.Pro61Pro	p.Pro61Pro	c.183C>T	synonymous_variant
125	10183723	rs1012545817	C	T	p.Arg64Arg	p.Arg64Arg	c.192C>T	synonymous_variant
126	10183730	rs1064794129	A	C	p.Asn67His	p.Asn67His	c.199A>C	missense_variant
127	10183732	rs769658318	C	G	p.Asn67Lys	p.Asn67Lys	c.201C>G	missense_variant
128	10183735	rs773246608	G	C	p.Ser68Ser	p.Ser68Ser	c.204G>C	synonymous_variant
129	10183736	rs1428175816	C	G	p.Arg69Gly	p.Arg69Gly	c.205C>G	missense_variant
130	10183739	rs5030802	G	A	p.Glu70Lys	p.Glu70Lys	c.208G>A	missense_variant
131	10183740	rs786202857	A	G	p.Glu70Gly	p.Glu70Gly	c.209A>G	missense_variant
132	10183744	rs201663073	C	T	p.Pro71Pro	p.Pro71Pro	c.213C>T	synonymous_variant
133	10183747	rs774557051	C	T	p.Ser72Ser	p.Ser72Ser	c.216C>T	synonymous_variant
134	10183753	rs759737367	C	G	p.Val74Val	p.Val74Val	c.222C>G	synonymous_variant
135	10183766	rs200885420	C	T	p.Arg79Cys	p.Arg79Cys	c.235C>T	missense_variant
136	10183768	rs760899424	C	T	p.Arg79Arg	p.Arg79Arg	c.237C>T	synonymous_variant
137	10183772	rs104893829	C	T	p.Pro81Ser	p.Pro81Ser	c.241C>T	missense_variant
138	10183773	rs193922608	C	A	p.Pro81Gln	p.Pro81Gln	c.242C>A	missense_variant
139	10183773	rs193922608	C	T	p.Pro81Leu	p.Pro81Leu	c.242C>T	missense_variant
140	10183774	rs758034030	G	A	p.Pro81Pro	p.Pro81Pro	c.243G>A	synonymous_variant
141	10183775	rs1214305423	C	T	p.Arg82Cys	p.Arg82Cys	c.244C>T	missense_variant
142	10183777	rs587780993	C	T	p.Arg82Arg	p.Arg82Arg	c.246C>T	synonymous_variant
143	10183778	rs751042065	G	C	p.Val83Leu	p.Val83Leu	c.247G>C	missense_variant
144	10183781	rs5030827	G	A	p.Val84Met	p.Val84Met	c.250G>A	missense_variant
145	10183782	rs1264207864	T	C	p.Val84Ala	p.Val84Ala	c.251T>C	missense_variant
146	10183784	rs1422271977	C	T	p.Leu85Leu	p.Leu85Leu	c.253C>T	synonymous_variant
147	10183786	rs876658508	G	A	p.Leu85Leu	p.Leu85Leu	c.255G>A	synonymous_variant
148	10183789	rs781063331	C	T	p.Pro86Pro	p.Pro86Pro	c.258C>T	synonymous_variant
149	10183789	rs781063331	C	G	p.Pro86Pro	p.Pro86Pro	c.258C>G	synonymous_variant
150	10183798	rs755794553	C	A	p.Leu89Leu	p.Leu89Leu	c.267C>A	synonymous_variant
151	10183804	rs1060503563	C	T	p.Phe91Phe	p.Phe91Phe	c.273C>T	synonymous_variant
152	10183805	rs587780731	G	T	p.Asp92Tyr	p.Asp92Tyr	c.274G>T	missense_variant
153	10183806	rs749091984	A	T	p.Asp92Val	p.Asp92Val	c.275A>T	missense_variant
154	10183808	rs5030808	G	T	p.Gly93Cys	p.Gly93Cys	c.277G>T	missense_variant
155	10183811	rs5030829	G	A	p.Glu94Lys	p.Glu94Lys	c.280G>A	missense_variant
156	10183820	rs863224688	C	T	p.Pro97Ser	p.Pro97Ser	c.289C>T	missense_variant
157	10183823	rs5030809	T	C	p.Tyr98His	p.Tyr98His	c.292T>C	missense_variant
158	10183826	rs549807529	C	G	p.Pro99Ala	p.Pro99Ala	c.295C>G	missense_variant
159	10183828	rs774753107	A	G	p.Pro99Pro	p.Pro99Pro	c.297A>G	synonymous_variant
160	10183829	rs745901803	A	G	p.Thr100Ala	p.Thr100Ala	c.298A>G	missense_variant
161	10183830	rs1346874866	C	G	p.Thr100Arg	p.Thr100Arg	c.299C>G	missense_variant
162	10183832	rs772300829	C	T	p.Leu101Leu	p.Leu101Leu	c.301C>T	synonymous_variant
163	10183836	rs1379270197	C	T	p.Pro102Leu	p.Pro102Leu	c.305C>T	missense_variant
164	10183840	rs1262511541	T	C	p.Pro103Pro	p.Pro103Pro	c.309T>C	synonymous_variant
165	10183843	rs946898891	C	T	p.Gly104Gly	p.Gly104Gly	c.312C>T	synonymous_variant
166	10183845	rs761240835	C	T	p.Thr105Met	p.Thr105Met	c.314C>T	missense_variant
167	10183846	rs769102979	G	C	p.Thr105Thr	p.Thr105Thr	c.315G>C	synonymous_variant
168	10183850	rs397516440	C	T	p.Arg107Cys	p.Arg107Cys	c.319C>T	missense_variant
169	10183854	rs367594943	G	A	p.Arg108His	p.Arg108His	c.323G>A	missense_variant
170	10183854	rs367594943	G	T	p.Arg108Leu	p.Arg108Leu	c.323G>T	missense_variant
171	10183864	rs765978945	C	G	p.Ser111Arg	p.Ser111Arg	c.333C>G	missense_variant
172	10183867	rs751232153	C	T	p.Tyr112Tyr	p.Tyr112Tyr	c.336C>T	synonymous_variant
173	10183868	rs5030810	C	A	p.Arg113Arg	p.Arg113Arg	c.337C>A	synonymous_variant
174	10183869	rs767062290	G	C	p.Arg113Pro	p.Arg113Pro	c.338G>C	missense_variant
175	10183876	rs61758376	G	C	c.340+5G>C		c.340+5G>C	splice_region_variant
176	10183877	rs1278726013	G	C	c.340+6G>C		c.340+6G>C	splice_region_variant
177	10183879	rs756068442	C	A	c.340+8C>A		c.340+8C>A	splice_region_variant
178	10183881	rs777622214	C	G	c.340+10C>G		c.340+10C>G	intron_variant
179	10183881	rs777622214	C	T	c.340+10C>T		c.340+10C>T	intron_variant
180	10183882	rs1309285376	G	A	c.340+11G>A		c.340+11G>A	intron_variant
181	10183891	rs757151154	G	A	c.340+20G>A		c.340+20G>A	intron_variant
182	10183895	rs1222961358	G	A	c.340+24G>A		c.340+24G>A	intron_variant
183	10183898	rs779228671	C	G	c.340+27C>G		c.340+27C>G	intron_variant
184	10183903	rs908690401	A	G	c.340+32A>G		c.340+32A>G	intron_variant
185	10183908	rs746101911	C	A	c.340+37C>A		c.340+37C>A	intron_variant
186	10183909	rs1202878197	G	C	c.340+38G>C		c.340+38G>C	intron_variant
187	10183915	rs1232595907	A	G	c.340+44A>G		c.340+44A>G	intron_variant
188	10183916	rs1481263438	C	T	c.340+45C>T		c.340+45C>T	intron_variant
189	10183920	rs1191981397	C	T	c.340+49C>T		c.340+49C>T	intron_variant
190	10183933	rs1011912727	A	G	c.340+62A>G		c.340+62A>G	intron_variant
191	10183934	rs1334583074	C	T	c.340+63C>T		c.340+63C>T	intron_variant
192	10188123	rs368713799	G	T	c.341-75G>T		c.341-75G>T	intron_variant
193	10188136	rs181985090	G	A	c.341-62G>A		c.341-62G>A	intron_variant
194	10188141	rs541565291	G	GGCCACCGTGCCCA	c.341-49_341-37dupTGCCCAGCCACCG		c.341-49_341-37dupTGCCCAGCCACCG	intron_variant
195	10188142	rs1277620415	G	T	c.341-56G>T		c.341-56G>T	intron_variant
196	10188147	rs772489344	C	T	c.341-51C>T		c.341-51C>T	intron_variant
197	10188148	rs1479846552	G	T	c.341-50G>T		c.341-50G>T	intron_variant
198	10188148	rs1479846552	G	A	c.341-50G>A		c.341-50G>A	intron_variant
199	10188153	rs1176516540	C	A	c.341-45C>A		c.341-45C>A	intron_variant
200	10188157	rs1431049410	C	A	c.341-41C>A		c.341-41C>A	intron_variant
201	10188158	rs780167833	A	T	c.341-40A>T		c.341-40A>T	intron_variant
202	10188159	rs1327945956	C	T	c.341-39C>T		c.341-39C>T	intron_variant
203	10188160	rs185858030	C	T	c.341-38C>T		c.341-38C>T	intron_variant
204	10188161	rs115744107	G	A	c.341-37G>A		c.341-37G>A	intron_variant
205	10188164	rs777033554	G	A	c.341-34G>A		c.341-34G>A	intron_variant
206	10188164	rs777033554	G	T	c.341-34G>T		c.341-34G>T	intron_variant
207	10188168	rs1344774130	C	A	c.341-30C>A		c.341-30C>A	intron_variant
208	10188172		T	TTAACAACCTTTGCTTGTCCCGATAGGTCACCTTTGGCTCTTCAGAGATGCAGGGA	p.Thr124IlefsTer26	p.Thr124IlefsTer26	c.341-25_370dupTAACAACCTTTGCTTGTCCCGATAGGTCACCTTTGGCTCTTCAGAGATGCAGGGA	intron_variant
209	10188173	rs779747717	TAAC	T	c.341-21_341-19delAAC		c.341-21_341-19delAAC	intron_variant
210	10188176	rs762113539	C	T	c.341-22C>T		c.341-22C>T	intron_variant
211	10188186	rs900747983	T	C	c.341-12T>C		c.341-12T>C	intron_variant
212	10188188	rs140064807	G	C	c.341-10G>C		c.341-10G>C	intron_variant
213	10188190	rs1272767361	C	T	c.341-8C>T		c.341-8C>T	splice_region_variant
214	10188191	rs1308495590	C	G	c.341-7C>G		c.341-7C>G	splice_region_variant
215	10188192	rs191201783	C	T	c.341-6C>T		c.341-6C>T	splice_region_variant
216	10188193	rs372340900	G	A	c.341-5G>A		c.341-5G>A	splice_region_variant
217	10188199	rs767136348	T	A	p.Gly114Gly	p.Gly114Gly	c.342T>A	splice_region_variant
218	10188208	rs727504215	G	A	p.Trp117Ter	p.Trp117Ter	c.351G>A	stop_gained
219	10188211	rs1051892430	C	T	p.Leu118Leu	p.Leu118Leu	c.354C>T	synonymous_variant
220	10188223	rs1474241640	A	G	p.Ala122Ala	p.Ala122Ala	c.366A>G	synonymous_variant
221	10188226	rs1166910853	G	T	p.Gly123Gly	p.Gly123Gly	c.369G>T	synonymous_variant
222	10188230	rs375401722	C	T	p.His125Tyr	p.His125Tyr	c.373C>T	missense_variant
223	10188232	rs863224372	C	T	p.His125His	p.His125His	c.375C>T	synonymous_variant
224	10188233	rs104893831	G	A	p.Asp126Asn	p.Asp126Asn	c.376G>A	missense_variant
225	10188234	rs1354593943	A	G	p.Asp126Gly	p.Asp126Gly	c.377A>G	missense_variant
226	10188235	rs764053615	T	C	p.Asp126Asp	p.Asp126Asp	c.378T>C	synonymous_variant
227	10188242	rs369018004	C	G	p.Leu129Val	p.Leu129Val	c.385C>G	missense_variant
228	10188242	rs369018004	C	T	p.Leu129Leu	p.Leu129Leu	c.385C>T	synonymous_variant
229	10188244	rs778846471	G	T	p.Leu129Leu	p.Leu129Leu	c.387G>T	synonymous_variant
230	10188252	rs1347416980	A	G	p.Gln132Arg	p.Gln132Arg	c.395A>G	missense_variant
231	10188256	rs750301189	T	C	p.Thr133Thr	p.Thr133Thr	c.399T>C	synonymous_variant
232	10188264	rs5030833	T	C	p.Phe136Ser	p.Phe136Ser	c.407T>C	missense_variant
233	10188265	rs878854125	T	G	p.Phe136Leu	p.Phe136Leu	c.408T>G	missense_variant
234	10188266	rs1362915830	G	C	p.Val137Leu	p.Val137Leu	c.409G>C	missense_variant
235	10188270	rs780178275	C	T	p.Pro138Leu	p.Pro138Leu	c.413C>T	missense_variant
236	10188273	rs587780732	C	G	p.Ser139Cys	p.Ser139Cys	c.416C>G	missense_variant
237	10188275	rs768637170	C	G	p.Leu140Val	p.Leu140Val	c.418C>G	missense_variant
238	10188277	rs369465430	C	A	p.Leu140Leu	p.Leu140Leu	c.420C>A	synonymous_variant
239	10188280	rs781618785	T	G	p.Asn141Lys	p.Asn141Lys	c.423T>G	missense_variant
240	10188283	rs143594610	T	C	p.Val142Val	p.Val142Val	c.426T>C	synonymous_variant
241	10188284	rs372757722	G	C	p.Asp143His	p.Asp143His	c.427G>C	missense_variant
242	10188286	rs773556807	C	T	p.Asp143Asp	p.Asp143Asp	c.429C>T	synonymous_variant
243	10188287	rs869025650	G	A	p.Gly144Arg	p.Gly144Arg	c.430G>A	missense_variant
244	10188290	rs749704215	C	G	p.Gln145Glu	p.Gln145Glu	c.433C>G	missense_variant
245	10188292	rs771727849	G	A	p.Gln145Gln	p.Gln145Gln	c.435G>A	synonymous_variant
246	10188292	rs771727849	G	C	p.Gln145His	p.Gln145His	c.435G>C	missense_variant
247	10188296	rs1057517560	A	G	p.Ile147Val	p.Ile147Val	c.439A>G	missense_variant
248	10188297	rs1060503555	T	C	p.Ile147Thr	p.Ile147Thr	c.440T>C	missense_variant
249	10188301	rs775038762	T	G	p.Phe148Leu	p.Phe148Leu	c.444T>G	missense_variant
250	10188306	rs760184234	A	G	p.Asn150Ser	p.Asn150Ser	c.449A>G	missense_variant
251	10188308	rs876659313	A	G	p.Ile151Val	p.Ile151Val	c.451A>G	missense_variant
252	10188313	rs1276364231	A	G	p.Thr152Thr	p.Thr152Thr	c.456A>G	synonymous_variant
253	10188316	rs1382653522	G	T	p.Leu153Leu	p.Leu153Leu	c.459G>T	synonymous_variant
254	10188318	rs1399097617	C	G	p.Pro154Arg	p.Pro154Arg	c.461C>G	missense_variant
255	10188319	rs1060503562	A	G	p.Pro154Pro	p.Pro154Pro	c.462A>G	splice_region_variant
256	10188324	rs879253989	C	T	c.463+4C>T		c.463+4C>T	splice_region_variant
257	10188328	rs5030834	C	T	c.463+8C>T		c.463+8C>T	splice_region_variant
258	10188329	rs1057522720	G	A	c.463+9G>A		c.463+9G>A	intron_variant
259	10188332	rs1382435156	T	C	c.463+12T>C		c.463+12T>C	intron_variant
260	10188333	rs1213910869	T	G	c.463+13T>G		c.463+13T>G	intron_variant
261	10188335	rs761828544	C	G	c.463+15C>G		c.463+15C>G	intron_variant
262	10188348	rs1273709773	T	G	c.463+28T>G		c.463+28T>G	intron_variant
263	10188351	rs765313182	GGTT	G	c.463+37_463+39delTGT		c.463+37_463+39delTGT	intron_variant
264	10188351	rs765313182	G	A	c.463+31G>A		c.463+31G>A	intron_variant
265	10188354	rs750211277	T	G	c.463+34T>G		c.463+34T>G	intron_variant
266	10188360	rs758157229	G	A	c.463+40G>A		c.463+40G>A	intron_variant
267	10188361	rs766571541	G	T	c.463+41G>T		c.463+41G>T	intron_variant
268	10188363	rs34661876	A	G	c.463+43A>G		c.463+43A>G	intron_variant
269	10188369	rs1201329979	A	G	c.463+49A>G		c.463+49A>G	intron_variant
270	10188369	rs1201329979	A	C	c.463+49A>C		c.463+49A>C	intron_variant
271	10188371	rs755014728	G	T	c.463+51G>T		c.463+51G>T	intron_variant
272	10188372	rs781248221	A	G	c.463+52A>G		c.463+52A>G	intron_variant
273	10188377	rs1351121831	C	T	c.463+57C>T		c.463+57C>T	intron_variant
274	10191398	rs1481983269	G	A	c.464-73G>A		c.464-73G>A	intron_variant
275	10191402	rs1204344078	A	C	c.464-69A>C		c.464-69A>C	intron_variant
276	10191405	rs1237916252	C	T	c.464-66C>T		c.464-66C>T	intron_variant
277	10191408	rs961458931	C	T	c.464-63C>T		c.464-63C>T	intron_variant
278	10191415	rs932290142	G	A	c.464-56G>A		c.464-56G>A	intron_variant
279	10191418	rs1183634851	C	T	c.464-53C>T		c.464-53C>T	intron_variant
280	10191433	rs920035142	C	G	c.464-38C>G		c.464-38C>G	intron_variant
281	10191434	rs748288951	T	A	c.464-37T>A		c.464-37T>A	intron_variant
282	10191439	rs778294945	T	C	c.464-32T>C		c.464-32T>C	intron_variant
283	10191442	rs749627152	C	G	c.464-29C>G		c.464-29C>G	intron_variant
284	10191443	rs771222897	A	C	c.464-28A>C		c.464-28A>C	intron_variant
285	10191444	rs1335030995	C	G	c.464-27C>G		c.464-27C>G	intron_variant
286	10191448	rs374577617	G	T	c.464-23G>T		c.464-23G>T	intron_variant
287	10191459	rs746646171	T	C	c.464-12T>C		c.464-12T>C	intron_variant
288	10191461	rs552930903	G	A	c.464-10G>A		c.464-10G>A	intron_variant
289	10191464	rs1279650154	C	T	c.464-7C>T		c.464-7C>T	splice_region_variant
290	10191478	rs1252473811	T	C	p.Thr157Thr	p.Thr157Thr	c.471T>C	synonymous_variant
291	10191492	rs397516444	G	T	p.Cys162Phe	p.Cys162Phe	c.485G>T	missense_variant
292	10191499	rs1352275281	G	C	p.Gln164His	p.Gln164His	c.492G>C	missense_variant
293	10191506	rs5030820	C	T	p.Arg167Trp	p.Arg167Trp	c.499C>T	missense_variant
294	10191507	rs5030821	G	A	p.Arg167Gln	p.Arg167Gln	c.500G>A	missense_variant
295	10191508	rs398123483	G	T	p.Arg167Arg	p.Arg167Arg	c.501G>T	synonymous_variant
296	10191512	rs1205346910	CT	C	p.Leu169GlnfsTer33	p.Leu169GlnfsTer33	c.506delT	frameshift_variant
297	10191514	rs878854126	A	C	p.Leu169Leu	p.Leu169Leu	c.507A>C	synonymous_variant
298	10191515	rs1437199117	GT	G	p.Val170AlafsTer32	p.Val170AlafsTer32	c.509delT	frameshift_variant
299	10191517	rs765224880	C	A	p.Val170Val	p.Val170Val	c.510C>A	synonymous_variant
300	10191517	rs765224880	C	T	p.Val170Val	p.Val170Val	c.510C>T	synonymous_variant
301	10191520	rs1365445365	G	T	p.Lys171Asn	p.Lys171Asn	c.513G>T	missense_variant
302	10191521	rs1473638511	C	A	p.Pro172Thr	p.Pro172Thr	c.514C>A	missense_variant
303	10191527	rs1060503566	A	T	p.Asn174Tyr	p.Asn174Tyr	c.520A>T	missense_variant
304	10191535	rs762748790	G	T	p.Arg176Ser	p.Arg176Ser	c.528G>T	missense_variant
305	10191537	rs1470394966	G	C	p.Arg177Thr	p.Arg177Thr	c.530G>C	missense_variant
306	10191538	rs766088261	A	G	p.Arg177Arg	p.Arg177Arg	c.531A>G	synonymous_variant
307	10191538	rs766088261	A	T	p.Arg177Ser	p.Arg177Ser	c.531A>T	missense_variant
308	10191539	rs755146587	C	G	p.Leu178Val	p.Leu178Val	c.532C>G	missense_variant
309	10191539	rs755146587	C	T	p.Leu178Leu	p.Leu178Leu	c.532C>T	synonymous_variant
310	10191542	rs767780451	G	A	p.Asp179Asn	p.Asp179Asn	c.535G>A	missense_variant
311	10191545	rs377715747	A	G	p.Ile180Val	p.Ile180Val	c.538A>G	missense_variant
312	10191547	rs374927292	C	T	p.Ile180Ile	p.Ile180Ile	c.540C>T	synonymous_variant
313	10191548	rs878854127	G	A	p.Val181Ile	p.Val181Ile	c.541G>A	missense_variant
314	10191551	rs778205243	A	G	p.Arg182Gly	p.Arg182Gly	c.544A>G	missense_variant
315	10191552	rs749774529	G	C	p.Arg182Thr	p.Arg182Thr	c.545G>C	missense_variant
316	10191552	rs749774529	G	A	p.Arg182Lys	p.Arg182Lys	c.545G>A	missense_variant
317	10191553	rs1224916824	G	T	p.Arg182Ser	p.Arg182Ser	c.546G>T	missense_variant
318	10191555	rs5030823	C	T	p.Ser183Leu	p.Ser183Leu	c.548C>T	missense_variant
319	10191556	rs193922614	G	A	p.Ser183Ser	p.Ser183Ser	c.549G>A	synonymous_variant
320	10191559	rs779157605	C	T	p.Leu184Leu	p.Leu184Leu	c.552C>T	synonymous_variant
321	10191560	rs768390987	T	A	p.Tyr185Asn	p.Tyr185Asn	c.553T>A	missense_variant
322	10191561	rs561874453	A	G	p.Tyr185Cys	p.Tyr185Cys	c.554A>G	missense_variant
323	10191563	rs367545984	G	A	p.Glu186Lys	p.Glu186Lys	c.556G>A	missense_variant
324	10191568	rs370769257	T	C	p.Asp187Asp	p.Asp187Asp	c.561T>C	synonymous_variant
325	10191569	rs5030824	C	G	p.Leu188Val	p.Leu188Val	c.562C>G	missense_variant
326	10191572	rs762790375	G	A	p.Glu189Lys	p.Glu189Lys	c.565G>A	missense_variant
327	10191579	rs370050374	A	G	p.His191Arg	p.His191Arg	c.572A>G	missense_variant
328	10191579	rs370050374	A	C	p.His191Pro	p.His191Pro	c.572A>C	missense_variant
329	10191580	rs759418244	C	T	p.His191His	p.His191His	c.573C>T	synonymous_variant
330	10191581	rs28940300	C	T	p.Pro192Ser	p.Pro192Ser	c.574C>T	missense_variant
331	10191581	rs28940300	C	G	p.Pro192Ala	p.Pro192Ala	c.574C>G	missense_variant
332	10191583	rs1372952726	A	C	p.Pro192Pro	p.Pro192Pro	c.576A>C	synonymous_variant
333	10191592	rs878854128	G	C	p.Gln195His	p.Gln195His	c.585G>C	missense_variant
334	10191597	rs752940316	A	C	p.Asp197Ala	p.Asp197Ala	c.590A>C	missense_variant
335	10191602	rs1325187978	G	C	p.Glu199Gln	p.Glu199Gln	c.595G>C	missense_variant
336	10191603	rs760690217	A	C	p.Glu199Ala	p.Glu199Ala	c.596A>C	missense_variant
337	10191604	rs1387975369	G	A	p.Glu199Glu	p.Glu199Glu	c.597G>A	synonymous_variant
338	10191605	rs28940298	C	T	p.Arg200Trp	p.Arg200Trp	c.598C>T	missense_variant
339	10191606	rs754016774	G	A	p.Arg200Gln	p.Arg200Gln	c.599G>A	missense_variant
340	10191612	rs779514074	C	T	p.Thr202Ile	p.Thr202Ile	c.605C>T	missense_variant
341	10191614	rs750711842	C	T	p.Gln203Ter	p.Gln203Ter	c.607C>T	stop_gained
342	10191615	rs1270568049	A	G	p.Gln203Arg	p.Gln203Arg	c.608A>G	missense_variant
343	10191617	rs758853661	G	T	p.Glu204Ter	p.Glu204Ter	c.610G>T	stop_gained
344	10191617	rs758853661	G	C	p.Glu204Gln	p.Glu204Gln	c.610G>C	missense_variant
345	10191619	rs747805018	G	A	p.Glu204Glu	p.Glu204Glu	c.612G>A	synonymous_variant
346	10191620	rs199926195	C	A	p.Arg205Ser	p.Arg205Ser	c.613C>A	missense_variant
347	10191620	rs199926195	C	T	p.Arg205Cys	p.Arg205Cys	c.613C>T	missense_variant
348	10191621	rs777130107	G	A	p.Arg205His	p.Arg205His	c.614G>A	missense_variant
349	10191627	rs1060503549	C	T	p.Ala207Val	p.Ala207Val	c.620C>T	missense_variant
350	10191629	rs121913347	C	T	p.His208Tyr	p.His208Tyr	c.622C>T	missense_variant
351	10191633	rs770746627	A	T	p.Gln209Leu	p.Gln209Leu	c.626A>T	missense_variant
352	10191634	rs758494789	A	G	p.Gln209Gln	p.Gln209Gln	c.627A>G	synonymous_variant
353	10191635	rs774380450	C	T	p.Arg210Trp	p.Arg210Trp	c.628C>T	missense_variant
354	10191636	rs138780791	G	A	p.Arg210Gln	p.Arg210Gln	c.629G>A	missense_variant
355	10191638	rs200019083	A	C	p.Met211Leu	p.Met211Leu	c.631A>C	missense_variant
356	10191639	rs1366708242	T	C	p.Met211Thr	p.Met211Thr	c.632T>C	missense_variant
357	10191646	rs775624944	T	G	p.Asp213Glu	p.Asp213Glu	c.639T>G	missense_variant
358	10191646	rs775624944	T	C	p.Asp213Asp	p.Asp213Asp	c.639T>C	synonymous_variant
359	10191647	rs1286603999	TGAA	T	c.*1_*3delAGA		c.*1_*3delAGA	coding_sequence_variant
360	10191651	rs1383791869	G	T	c.*2G>T		c.*2G>T	3_prime_UTR_variant
361	10191656	rs778005138	C	T	c.*7C>T		c.*7C>T	3_prime_UTR_variant
362	10191656	rs778005138	C	A	c.*7C>A		c.*7C>A	3_prime_UTR_variant
363	10191658	rs764358108	G	C	c.*9G>C		c.*9G>C	3_prime_UTR_variant
364	10191658	rs764358108	G	A	c.*9G>A		c.*9G>A	3_prime_UTR_variant
365	10191665	rs1380364658	C	G	c.*16C>G		c.*16C>G	3_prime_UTR_variant
366	10191665	rs1380364658	C	T	c.*16C>T		c.*16C>T	3_prime_UTR_variant
367	10191667	rs770268755	T	TA	c.*19dupA		c.*19dupA	3_prime_UTR_variant
368	10191668	rs201934530	AC	A	c.*20delC		c.*20delC	3_prime_UTR_variant
369	10191668	rs201934530	A	G	c.*19A>G		c.*19A>G	3_prime_UTR_variant
370	10191671	rs765610126	C	T	c.*22C>T		c.*22C>T	3_prime_UTR_variant
371	10191674	rs373943536	T	C	c.*25T>C		c.*25T>C	3_prime_UTR_variant
372	10191677	rs750952266	C	T	c.*28C>T		c.*28C>T	3_prime_UTR_variant
373	10191677	rs750952266	C	A	c.*28C>A		c.*28C>A	3_prime_UTR_variant
374	10191678	rs758765633	A	C	c.*29A>C		c.*29A>C	3_prime_UTR_variant
375	10191680		C	T	c.*31C>T		c.*31C>T	3_prime_UTR_variant
376	10191683	rs1485677957	A	T	c.*34A>T		c.*34A>T	3_prime_UTR_variant
377	10191686	rs780557277	T	C	c.*37T>C		c.*37T>C	3_prime_UTR_variant
378	10191690	rs1250098348	G	T	c.*41G>T		c.*41G>T	3_prime_UTR_variant
379	10191691	rs1460298516	A	G	c.*42A>G		c.*42A>G	3_prime_UTR_variant
380	10191691	rs1460298516	A	T	c.*42A>T		c.*42A>T	3_prime_UTR_variant
381	10191693	rs752024930	G	C	c.*44G>C		c.*44G>C	3_prime_UTR_variant
382	10191693	rs752024930	G	A	c.*44G>A		c.*44G>A	3_prime_UTR_variant
383	10191694	rs1474496741	G	T	c.*45G>T		c.*45G>T	3_prime_UTR_variant
384	10191697	rs781141216	C	G	c.*48C>G		c.*48C>G	3_prime_UTR_variant
385	10191700	rs1426002212	A	G	c.*51A>G		c.*51A>G	3_prime_UTR_variant
386	10191719	rs552290225	C	T	c.*70C>T		c.*70C>T	3_prime_UTR_variant
KDR
1	55079872	rs1484496563	A	AC	c.*68dup		c.*68dup	3_prime_UTR_variant
2	55079875	rs1392787167	A	C	c.*66T>G		c.*66T>G	3_prime_UTR_variant
3	55079878		C	G	c.*63G>C		c.*63G>C	3_prime_UTR_variant
4	55079879	rs1578123818	T	G	c.*62A>C		c.*62A>C	3_prime_UTR_variant
5	55079881	rs1127904	G	C	c.*60C>G		c.*60C>G	3_prime_UTR_variant
6	55079889	rs764411718	G	A	c.*52C>T		c.*52C>T	3_prime_UTR_variant
7	55079910	rs542341800	G	C	c.*31C>G		c.*31C>G	3_prime_UTR_variant
8	55079911	rs758468692	T	C	c.*30A>G		c.*30A>G	3_prime_UTR_variant
9	55079914	rs4421048	A	G	c.*27T>C		c.*27T>C	3_prime_UTR_variant
10	55079919	rs1578123849	T	C	c.*22A>G		c.*22A>G	3_prime_UTR_variant
11	55079920	rs752955799	TG	T	c.*20del		c.*20del	3_prime_UTR_variant
12	55079922	rs377347767	G	C	c.*19C>G		c.*19C>G	3_prime_UTR_variant
13	55079924	rs1387469914	G	A	c.*17C>T		c.*17C>T	3_prime_UTR_variant
14	55079927	rs1252219537	G	T	c.*14C>A		c.*14C>A	3_prime_UTR_variant
15	55079930	rs779918284	G	A	c.*11C>T		c.*11C>T	3_prime_UTR_variant
16	55079937		C	T	c.*4G>A		c.*4G>A	3_prime_UTR_variant
17	55079945	rs149590065	A	G	p.Val1356Ala	p.Val1356Ala	c.4067T>C	missense_variant
18	55079954	rs371990058	G	T	p.Ser1353Tyr	p.Ser1353Tyr	c.4058C>A	missense_variant
19	55079955	rs1473561441	A	G	p.Ser1353Pro	p.Ser1353Pro	c.4057T>C	missense_variant
20	55079957	rs1287197336	C	G	p.Ser1352Thr	p.Ser1352Thr	c.4055G>C	missense_variant
21	55079966	rs1316766290	G	C	p.Thr1349Ser	p.Thr1349Ser	c.4046C>G	missense_variant
22	55079971	rs777208249	C	T	p.Ser1347Ser	p.Ser1347Ser	c.4041G>A	synonymous_variant
23	55079980	rs759990302	C	A	p.Gln1344His	p.Gln1344His	c.4032G>T	missense_variant
24	55079987	rs944040191	A	G	p.Ile1342Thr	p.Ile1342Thr	c.4025T>C	missense_variant
25	55079993	rs144265910	G	A	p.Ala1340Val	p.Ala1340Val	c.4019C>T	missense_variant
26	55079994	rs775644461	C	G	p.Ala1340Pro	p.Ala1340Pro	c.4018G>C	missense_variant
27	55079995	rs1488502997	T	C	p.Thr1339Thr	p.Thr1339Thr	c.4017A>G	synonymous_variant
28	55080002	rs763206832	C	T	p.Gly1337Asp	p.Gly1337Asp	c.4010G>A	missense_variant
29	55080004	rs35961234	G	A	p.Thr1336Thr	p.Thr1336Thr	c.4008C>T	synonymous_variant
30	55080010		C	T	p.Val1334Val	p.Val1334Val	c.4002G>A	synonymous_variant
31	55080022	rs777554839	T	TTTTTAA	p.Ile1330_Glu1331insTer	p.Ile1330_Glu1331insTer	c.3989_3990insTTAAAA	stop_gained
32	55080024	rs142258660	T	G	p.Ile1330Leu	p.Ile1330Leu	c.3988A>C	missense_variant
33	55080024	rs142258660	T	A	p.Ile1330Leu	p.Ile1330Leu	c.3988A>T	missense_variant
34	55080036	rs778737297	G	T	p.Leu1326Ile	p.Leu1326Ile	c.3976C>A	missense_variant
35	55080044	rs1483284953	TC	T	p.Glu1323LysfsTer5	p.Glu1323LysfsTer5	c.3967del	frameshift_variant
36	55080049		A	C	p.Ser1321Arg	p.Ser1321Arg	c.3963T>G	missense_variant
37	55080051	rs1442394693	T	A	p.Ser1321Cys	p.Ser1321Cys	c.3961A>T	missense_variant
38	55080053	rs758090721	G	A	p.Ser1320Phe	p.Ser1320Phe	c.3959C>T	missense_variant
39	55080060	rs770504400	C	A	p.Val1318Leu	p.Val1318Leu	c.3952G>T	missense_variant
40	55080061		G	A	p.Thr1317Thr	p.Thr1317Thr	c.3951C>T	synonymous_variant
41	55080062	rs377287206	G	A	p.Thr1317Ile	p.Thr1317Ile	c.3950C>T	missense_variant
42	55080065	rs530823779	G	T	p.Thr1316Asn	p.Thr1316Asn	c.3947C>A	missense_variant
43	55080067	rs1346632902	G	A	p.Asp1315Asp	p.Asp1315Asp	c.3945C>T	synonymous_variant
44	55080074	rs763179429	T	C	p.Asp1313Gly	p.Asp1313Gly	c.3938A>G	missense_variant
45	55080075	rs151242590	C	T	p.Asp1313Asn	p.Asp1313Asn	c.3937G>A	missense_variant
46	55080079	rs774371518	G	A	p.Ser1311Ser	p.Ser1311Ser	c.3933C>T	synonymous_variant
47	55080090	rs761896566	C	T	p.Gly1308Arg	p.Gly1308Arg	c.3922G>A	missense_variant
48	55080091	rs199769280	G	A	p.Ser1307Ser	p.Ser1307Ser	c.3921C>T	synonymous_variant
49	55080096	rs1351872119	G	A	p.Gln1306Ter	p.Gln1306Ter	c.3916C>T	stop_gained
50	55080097	rs776589210	G	A	p.Tyr1305Tyr	p.Tyr1305Tyr	c.3915C>T	synonymous_variant
51	55080102	rs758952853	C	T	p.Gly1304Ser	p.Gly1304Ser	c.3910G>A	missense_variant
52	55080102	rs758952853	C	A	p.Gly1304Cys	p.Gly1304Cys	c.3910G>T	missense_variant
53	55080109		C	G	p.Gln1301His	p.Gln1301His	c.3903G>C	missense_variant
54	55080112	rs1047307493	G	A	p.Asn1300Asn	p.Asn1300Asn	c.3900C>T	synonymous_variant
55	55080119	rs751241917	C	T	p.Gly1298Asp	p.Gly1298Asp	c.3893G>A	missense_variant
56	55080119	rs751241917	C	G	p.Gly1298Ala	p.Gly1298Ala	c.3893G>C	missense_variant
57	55080124	rs56347250	A	T	p.Ser1296Ser	p.Ser1296Ser	c.3888T>A	synonymous_variant
58	55080125		G	T	p.Ser1296Tyr	p.Ser1296Tyr	c.3887C>A	missense_variant
59	55080138		C	T	p.Glu1292Lys	p.Glu1292Lys	c.3874G>A	missense_variant
60	55080156	rs188653929	C	G	p.Val1286Leu	p.Val1286Leu	c.3856G>C	missense_variant
61	55080156	rs188653929	C	T	p.Val1286Met	p.Val1286Met	c.3856G>A	missense_variant
62	55080163	rs139803589	A	T	p.Gly1283Gly	p.Gly1283Gly	c.3849T>A	splice_region_variant
63	55080164	rs144778059	C	T	c.3849-1G>A		c.3849-1G>A	splice_acceptor_variant
64	55080178	rs748336260	G	A	c.3849-15C>T		c.3849-15C>T	intron_variant
65	55080180		A	T	c.3849-17T>A		c.3849-17T>A	intron_variant
66	55080181	rs1325319630	A	G	c.3849-18T>C		c.3849-18T>C	intron_variant
67	55080187	rs10006115	G	T	c.3849-24C>A		c.3849-24C>A	intron_variant
68	55080200	rs368681232	A	T	c.3849-37T>A		c.3849-37T>A	intron_variant
69	55080202	rs763790163	A	G	c.3849-39T>C		c.3849-39T>C	intron_variant
70	55080205	rs199507830	A	G	c.3849-42T>C		c.3849-42T>C	intron_variant
71	55080230	rs1354942249	C	A	c.3849-67G>T		c.3849-67G>T	intron_variant
72	55080233		C	T	c.3849-70G>A		c.3849-70G>A	intron_variant
73	55081884		T	TA	c.3848+71dup		c.3848+71dup	intron_variant
74	55081884	rs747625211	T	TAAG	c.3848+71_3848+72insCTT		c.3848+71_3848+72insCTT	intron_variant
75	55081891		A	G	c.3848+65T>C		c.3848+65T>C	intron_variant
76	55081894	rs1232481275	G	A	c.3848+62C>T		c.3848+62C>T	intron_variant
77	55081901	rs150001331	G	A	c.3848+55C>T		c.3848+55C>T	intron_variant
78	55081901	rs150001331	G	T	c.3848+55C>A		c.3848+55C>A	intron_variant
79	55081906	rs749988660	T	C	c.3848+50A>G		c.3848+50A>G	intron_variant
80	55081907		T	C	c.3848+49A>G		c.3848+49A>G	intron_variant
81	55081913	rs1296224183	A	T	c.3848+43T>A		c.3848+43T>A	intron_variant
82	55081918	rs1367264814	C	T	c.3848+38G>A		c.3848+38G>A	intron_variant
83	55081919	rs371083519	T	G	c.3848+37A>C		c.3848+37A>C	intron_variant
84	55081927	rs201475000	T	A	c.3848+29A>T		c.3848+29A>T	intron_variant
85	55081928	rs959902576	T	C	c.3848+28A>G		c.3848+28A>G	intron_variant
86	55081931	rs1314381435	T	C	c.3848+25A>G		c.3848+25A>G	intron_variant
87	55081932		C	A	c.3848+24G>T		c.3848+24G>T	intron_variant
88	55081936	rs184864114	T	C	c.3848+20A>G		c.3848+20A>G	intron_variant
89	55081940	rs537549131	T	C	c.3848+16A>G		c.3848+16A>G	intron_variant
90	55081941	rs2412617	A	G	c.3848+15T>C		c.3848+15T>C	intron_variant
91	55081974		T	G	p.Lys1277Thr	p.Lys1277Thr	c.3830A>C	missense_variant
92	55081975	rs1420386006	T	C	p.Lys1277Glu	p.Lys1277Glu	c.3829A>G	missense_variant
93	55081976	rs1475617769	G	A	p.Thr1276Thr	p.Thr1276Thr	c.3828C>T	synonymous_variant
94	55081977	rs1270728971	GT	G	p.Thr1276ProfsTer52	p.Thr1276ProfsTer52	c.3826del	frameshift_variant
95	55081978	rs747121988	T	G	p.Thr1276Pro	p.Thr1276Pro	c.3826A>C	missense_variant
96	55081989	rs145291918	A	C	p.Leu1272Trp	p.Leu1272Trp	c.3815T>G	missense_variant
97	55081996	rs587778427	T	G	p.Lys1270Gln	p.Lys1270Gln	c.3808A>C	missense_variant
98	55082002		C	T	p.Glu1268Lys	p.Glu1268Lys	c.3802G>A	missense_variant
99	55082014	rs765804235	G	A	p.Leu1264Phe	p.Leu1264Phe	c.3790C>T	missense_variant
100	55082021	rs754415523	A	G	p.Gly1261Gly	p.Gly1261Gly	c.3783T>C	synonymous_variant
101	55082024	rs915900852	A	G	p.Ser1260Ser	p.Ser1260Ser	c.3780T>C	synonymous_variant
102	55082025	rs367734604	C	T	p.Ser1260Asn	p.Ser1260Asn	c.3779G>A	missense_variant
103	55082030	rs779352139	C	T	p.Thr1258Thr	p.Thr1258Thr	c.3774G>A	synonymous_variant
104	55082031	rs147627339	G	A	p.Thr1258Met	p.Thr1258Met	c.3773C>T	missense_variant
105	55082032		T	C	p.Thr1258Ala	p.Thr1258Ala	c.3772A>G	missense_variant
106	55082038	rs758699792	T	C	p.Asn1256Asp	p.Asn1256Asp	c.3766A>G	missense_variant
107	55082047	rs778023317	T	C	c.3763-6A>G		c.3763-6A>G	splice_region_variant
108	55082050	rs370178960	G	T	c.3763-9C>A		c.3763-9C>A	intron_variant
109	55082060	rs745915381	G	A	c.3763-19C>T		c.3763-19C>T	intron_variant
110	55082063	rs908580455	G	T	c.3763-22C>A		c.3763-22C>A	intron_variant
111	55082067	rs1475661630	C	G	c.3763-26G>C		c.3763-26G>C	intron_variant
112	55082072	rs1164182419	A	C	c.3763-31T>G		c.3763-31T>G	intron_variant
113	55082081	rs761718110	T	C	c.3763-40A>G		c.3763-40A>G	intron_variant
114	55082094	rs1166440987	A	T	c.3763-53T>A		c.3763-53T>A	intron_variant
115	55082095	rs546089321	CTATT	C	c.3763-58_3763-55del		c.3763-58_3763-55del	intron_variant
116	55082102	rs1487215614	A	G	c.3763-61T>C		c.3763-61T>C	intron_variant
117	55082108		C	A	c.3763-67G>T		c.3763-67G>T	intron_variant
118	55082477		C	G	c.3762+59G>C		c.3762+59G>C	intron_variant
119	55082480	rs1214968816	G	A	c.3762+56C>T		c.3762+56C>T	intron_variant
120	55082486	rs530260334	G	A	c.3762+50C>T		c.3762+50C>T	intron_variant
121	55082488	rs1265154614	T	G	c.3762+48A>C		c.3762+48A>C	intron_variant
122	55082497	rs547194966	T	G	c.3762+39A>C		c.3762+39A>C	intron_variant
123	55082506	rs760219983	T	C	c.3762+30A>G		c.3762+30A>G	intron_variant
124	55082511	rs902199058	G	T	c.3762+25C>A		c.3762+25C>A	intron_variant
125	55082527	rs374982964	C	T	c.3762+9G>A		c.3762+9G>A	intron_variant
126	55082528	rs78801899	G	T	c.3762+8C>A		c.3762+8C>A	splice_region_variant
127	55082528	rs78801899	G	A	c.3762+8C>T		c.3762+8C>T	splice_region_variant
128	55082537		T	A	p.Asp1254Val	p.Asp1254Val	c.3761A>T	missense_variant
129	55082541	rs142120845	G	A	p.Pro1253Ser	p.Pro1253Ser	c.3757C>T	missense_variant
130	55082547	rs150116423	C	A	p.Val1251Leu	p.Val1251Leu	c.3751G>T	missense_variant
131	55082565	rs1242969500	C	G	p.Glu1245Gln	p.Glu1245Gln	c.3733G>C	missense_variant
132	55082568	rs757443823	A	G	p.Leu1244Leu	p.Leu1244Leu	c.3730T>C	synonymous_variant
133	55082569	rs781436645	C	T	p.Pro1243Pro	p.Pro1243Pro	c.3729G>A	synonymous_variant
134	55082570	rs150847930	G	A	p.Pro1243Leu	p.Pro1243Leu	c.3728C>T	missense_variant
135	55082577	rs568921825	C	T	p.Asp1241Asn	p.Asp1241Asn	c.3721G>A	missense_variant
136	55082579	rs1362907976	T	G	p.Glu1240Ala	p.Glu1240Ala	c.3719A>C	missense_variant
137	55082582	rs1319864675	A	G	p.Phe1239Ser	p.Phe1239Ser	c.3716T>C	missense_variant
138	55082592		C	G	p.Val1236Leu	p.Val1236Leu	c.3706G>C	missense_variant
139	55082594	rs377109088	C	T	p.Ser1235Asn	p.Ser1235Asn	c.3704G>A	missense_variant
140	55082595	rs748096654	T	A	p.Ser1235Cys	p.Ser1235Cys	c.3703A>T	missense_variant
141	55082596	rs772035220	C	A	p.Val1234Val	p.Val1234Val	c.3702G>T	synonymous_variant
142	55082598	rs1457048123	C	T	p.Val1234Met	p.Val1234Met	c.3700G>A	missense_variant
143	55082603	rs368229220	C	T	p.Arg1232Gln	p.Arg1232Gln	c.3695G>A	missense_variant
144	55082603	rs368229220	C	G	p.Arg1232Pro	p.Arg1232Pro	c.3695G>C	missense_variant
145	55082604	rs185368292	G	A	p.Arg1232Trp	p.Arg1232Trp	c.3694C>T	missense_variant
146	55082608	rs759104314	C	A	p.Lys1230Asn	p.Lys1230Asn	c.3690G>T	missense_variant
147	55082611	rs764721295	T	C	p.Arg1229Arg	p.Arg1229Arg	c.3687A>G	synonymous_variant
148	55082617	rs1408509179	A	G	p.Ser1227Ser	p.Ser1227Ser	c.3681T>C	synonymous_variant
149	55082627	rs1273220442	A	T	p.Leu1224Gln	p.Leu1224Gln	c.3671T>A	missense_variant
150	55082636	rs1481926952	C	T	c.3663-1G>A		c.3663-1G>A	splice_acceptor_variant
151	55082638	rs200648845	G	T	c.3663-3C>A		c.3663-3C>A	splice_region_variant
152	55082652	rs948272810	A	T	c.3663-17T>A		c.3663-17T>A	intron_variant
153	55082659	rs1275672478	T	C	c.3663-24A>G		c.3663-24A>G	intron_variant
154	55082662	rs1230311770	T	TA	c.3663-28dup		c.3663-28dup	intron_variant
155	55082665	rs372769194	T	C	c.3663-30A>G		c.3663-30A>G	intron_variant
156	55082667	rs1296780934	G	A	c.3663-32C>T		c.3663-32C>T	intron_variant
157	55082673	rs1332776213	T	A	c.3663-38A>T		c.3663-38A>T	intron_variant
158	55082681	rs770746793	T	G	c.3663-46A>C		c.3663-46A>C	intron_variant
159	55082682	rs201866429	G	A	c.3663-47C>T		c.3663-47C>T	intron_variant
160	55082687	rs553564973	T	A	c.3663-52A>T		c.3663-52A>T	intron_variant
161	55082688	rs974557653	C	G	c.3663-53G>C		c.3663-53G>C	intron_variant
162	55082689	rs1027068452	G	A	c.3663-54C>T		c.3663-54C>T	intron_variant
163	55082694	rs1478608804	C	G	c.3663-59G>C		c.3663-59G>C	intron_variant
164	55082698	rs1004806880	A	G	c.3663-63T>C		c.3663-63T>C	intron_variant
165	55087534	rs866846066	C	T	c.3662+73G>A		c.3662+73G>A	intron_variant
166	55087535	rs528559143	C	T	c.3662+72G>A		c.3662+72G>A	intron_variant
167	55087544	rs991619470	T	A	c.3662+63A>T		c.3662+63A>T	intron_variant
168	55087545	rs1403053216	C	G	c.3662+62G>C		c.3662+62G>C	intron_variant
169	55087546	rs551498433	C	T	c.3662+61G>A		c.3662+61G>A	intron_variant
170	55087547	rs565460125	C	G	c.3662+60G>C		c.3662+60G>C	intron_variant
171	55087549		C	G	c.3662+58G>C		c.3662+58G>C	intron_variant
172	55087550	rs1346032892	T	C	c.3662+57A>G		c.3662+57A>G	intron_variant
173	55087553	rs950287107	C	T	c.3662+54G>A		c.3662+54G>A	intron_variant
174	55087553		C	G	c.3662+54G>C		c.3662+54G>C	intron_variant
175	55087554	rs531038897	G	A	c.3662+53C>T		c.3662+53C>T	intron_variant
176	55087558	rs551175926	T	C	c.3662+49A>G		c.3662+49A>G	intron_variant
177	55087563	rs567828738	T	C	c.3662+44A>G		c.3662+44A>G	intron_variant
178	55087573	rs764514760	C	G	c.3662+34G>C		c.3662+34G>C	intron_variant
179	55087575	rs755585942	T	TC	c.3662+31dup		c.3662+31dup	intron_variant
180	55087580	rs1237810106	CG	C	c.3662+26del		c.3662+26del	intron_variant
181	55087581	rs191767790	G	A	c.3662+26C>T		c.3662+26C>T	intron_variant
182	55087584	rs369296279	G	C	c.3662+23C>G		c.3662+23C>G	intron_variant
183	55087585	rs201171220	G	T	c.3662+22C>A		c.3662+22C>A	intron_variant
184	55087587	rs1191878020	T	A	c.3662+20A>T		c.3662+20A>T	intron_variant
185	55087588	rs376242865	G	A	c.3662+19C>T		c.3662+19C>T	intron_variant
186	55087590	rs756385325	T	C	c.3662+17A>G		c.3662+17A>G	intron_variant
187	55087595	rs375416763	C	T	c.3662+12G>A		c.3662+12G>A	intron_variant
188	55087602	rs1304269303	A	G	c.3662+5T>C		c.3662+5T>C	splice_region_variant
189	55087615	rs1222817406	T	A	p.Ala1218Ala	p.Ala1218Ala	c.3654A>T	synonymous_variant
190	55087619	rs1387804198	G	A	p.Thr1217Ile	p.Thr1217Ile	c.3650C>T	missense_variant
191	55087622	rs200996447	T	G	p.Asn1216Thr	p.Asn1216Thr	c.3647A>C	missense_variant
192	55087623		T	A	p.Asn1216Tyr	p.Asn1216Tyr	c.3646A>T	missense_variant
193	55087636	rs752218796	T	C	p.Lys1211Lys	p.Lys1211Lys	c.3633A>G	synonymous_variant
194	55087651	rs762732518	TTCC	T	p.Glu1206del	p.Glu1206del	c.3615_3617del	inframe_deletion
195	55087652	rs894012405	T	C	p.Glu1206Gly	p.Glu1206Gly	c.3617A>G	missense_variant
196	55087653	rs1365571238	C	A	p.Glu1206Ter	p.Glu1206Ter	c.3616G>T	stop_gained
197	55087660	rs1011564548	C	T	p.Glu1203Glu	p.Glu1203Glu	c.3609G>A	synonymous_variant
198	55087662	rs538723560	C	G	p.Glu1203Gln	p.Glu1203Gln	c.3607G>C	missense_variant
199	55087665	rs145493938	T	C	p.Met1202Val	p.Met1202Val	c.3604A>G	missense_variant
200	55087671	rs779617216	A	G	p.Ser1200Pro	p.Ser1200Pro	c.3598T>C	missense_variant
201	55087691	rs1256566758	G	A	p.Ser1193Phe	p.Ser1193Phe	c.3578C>T	missense_variant
202	55087693		G	A	p.Leu1192Leu	p.Leu1192Leu	c.3576C>T	synonymous_variant
203	55087717	rs768576998	C	T	p.Leu1184Leu	p.Leu1184Leu	c.3552G>A	synonymous_variant
204	55087729	rs1321944827	T	C	p.Ile1180Met	p.Ile1180Met	c.3540A>G	missense_variant
205	55087730	rs760114131	A	G	p.Ile1180Thr	p.Ile1180Thr	c.3539T>C	missense_variant
206	55087731	rs143459233	T	A	p.Ile1180Leu	p.Ile1180Leu	c.3538A>T	missense_variant
207	55087732	rs137873945	C	G	p.Pro1179Pro	p.Pro1179Pro	c.3537G>C	synonymous_variant
208	55087732	rs137873945	C	A	p.Pro1179Pro	p.Pro1179Pro	c.3537G>T	synonymous_variant
209	55087732	rs137873945	C	T	p.Pro1179Pro	p.Pro1179Pro	c.3537G>A	synonymous_variant
210	55087733	rs1308888714	G	A	p.Pro1179Leu	p.Pro1179Leu	c.3536C>T	missense_variant
211	55087756	rs146738218	A	C	p.Asp1171Glu	p.Asp1171Glu	c.3513T>G	missense_variant
212	55087756	rs146738218	A	G	p.Asp1171Asp	p.Asp1171Asp	c.3513T>C	splice_region_variant
213	55087765	rs568957983	C	T	c.3511-7G>A		c.3511-7G>A	splice_region_variant
214	55087769	rs537611846	A	G	c.3511-11T>C		c.3511-11T>C	intron_variant
215	55087771	rs1408715939	A	G	c.3511-13T>C		c.3511-13T>C	intron_variant
216	55087780	rs902453458	A	G	c.3511-22T>C		c.3511-22T>C	intron_variant
217	55087782	rs1167303023	T	C	c.3511-24A>G		c.3511-24A>G	intron_variant
218	55087784	rs757239496	T	C	c.3511-26A>G		c.3511-26A>G	intron_variant
219	55087786	rs1253181047	G	T	c.3511-28C>A		c.3511-28C>A	intron_variant
220	55087790	rs1000757723	T	C	c.3511-32A>G		c.3511-32A>G	intron_variant
221	55087794	rs1033021479	T	C	c.3511-36A>G		c.3511-36A>G	intron_variant
222	55087800		T	G	c.3511-42A>C		c.3511-42A>C	intron_variant
223	55087807	rs200251218	G	T	c.3511-49C>A		c.3511-49C>A	intron_variant
224	55087807	rs200251218	G	A	c.3511-49C>T		c.3511-49C>T	intron_variant
225	55087808	rs1012322904	T	C	c.3511-50A>G		c.3511-50A>G	intron_variant
226	55087824	rs1022745467	AC	A	c.3511-67del		c.3511-67del	intron_variant
227	55087825	rs574342836	C	A	c.3511-67G>T		c.3511-67G>T	intron_variant
228	55088802	rs560735535	G	A	c.3510+66C>T		c.3510+66C>T	intron_variant
229	55088802	rs560735535	G	T	c.3510+66C>A		c.3510+66C>A	intron_variant
230	55088814	rs1474189777	GT	G	c.3510+53del		c.3510+53del	intron_variant
231	55088815	rs772296731	T	C	c.3510+53A>G		c.3510+53A>G	intron_variant
232	55088816	rs1187027427	C	A	c.3510+52G>T		c.3510+52G>T	intron_variant
233	55088817	rs1177267591	C	G	c.3510+51G>C		c.3510+51G>C	intron_variant
234	55088822	rs1486591139	C	T	c.3510+46G>A		c.3510+46G>A	intron_variant
235	55088823		A	C	c.3510+45T>G		c.3510+45T>G	intron_variant
236	55088825		C	T	c.3510+43G>A		c.3510+43G>A	intron_variant
237	55088838	rs1258401031	G	T	c.3510+30C>A		c.3510+30C>A	intron_variant
238	55088849	rs1464782026	T	G	c.3510+19A>C		c.3510+19A>C	intron_variant
239	55088854	rs184171760	T	G	c.3510+14A>C		c.3510+14A>C	intron_variant
240	55088855	rs369334369	G	A	c.3510+13C>T		c.3510+13C>T	intron_variant
241	55088856	rs115734907	G	A	c.3510+12C>T		c.3510+12C>T	intron_variant
242	55088869		T	C	p.Gln1170Arg	p.Gln1170Arg	c.3509A>G	missense_variant
243	55088877	rs76466720	A	G	p.Asn1167Asn	p.Asn1167Asn	c.3501T>C	synonymous_variant
244	55088878	rs778467494	T	C	p.Asn1167Ser	p.Asn1167Ser	c.3500A>G	missense_variant
245	55088882	rs1312704512	C	T	p.Ala1166Thr	p.Ala1166Thr	c.3496G>A	missense_variant
246	55088907	rs777034146	C	T	p.Val1157Val	p.Val1157Val	c.3471G>A	synonymous_variant
247	55088909	rs1560513716	C	A	p.Val1157Leu	p.Val1157Leu	c.3469G>T	missense_variant
248	55088922	rs56242771	C	T	p.Thr1152Thr	p.Thr1152Thr	c.3456G>A	synonymous_variant
249	55088922		C	G	p.Thr1152Thr	p.Thr1152Thr	c.3456G>C	synonymous_variant
250	55088923	rs373562441	G	A	p.Thr1152Met	p.Thr1152Met	c.3455C>T	missense_variant
251	55088933	rs376432705	G	C	p.Gln1149Glu	p.Gln1149Glu	c.3445C>G	missense_variant
252	55088939	rs121917766	G	C	p.Pro1147Ala	p.Pro1147Ala	c.3439C>G	missense_variant
253	55088939	rs121917766	G	A	p.Pro1147Ser	p.Pro1147Ser	c.3439C>T	missense_variant
254	55088942	rs145854690	C	G	p.Glu1146Gln	p.Glu1146Gln	c.3436G>C	missense_variant
255	55088944		C	A	p.Gly1145Val	p.Gly1145Val	c.3434G>T	missense_variant
256	55088945	rs776671822	C	T	p.Gly1145Arg	p.Gly1145Arg	c.3433G>A	missense_variant
257	55088946	rs754684490	G	A	p.His1144His	p.His1144His	c.3432C>T	synonymous_variant
258	55088970	rs1241588145	G	A	p.Tyr1136Tyr	p.Tyr1136Tyr	c.3408C>T	synonymous_variant
259	55088977	rs370501217	G	A	c.3405-4C>T		c.3405-4C>T	splice_region_variant
260	55088983	rs771471170	C	A	c.3405-10G>T		c.3405-10G>T	intron_variant
261	55089006	rs746178395	C	A	c.3405-33G>T		c.3405-33G>T	intron_variant
262	55089007		C	G	c.3405-34G>C		c.3405-34G>C	intron_variant
263	55089007	rs770062007	C	T	c.3405-34G>A		c.3405-34G>A	intron_variant
264	55089009	rs992293763	C	T	c.3405-36G>A		c.3405-36G>A	intron_variant
265	55089013	rs1396247644	C	T	c.3405-40G>A		c.3405-40G>A	intron_variant
266	55089029	rs916787555	A	C	c.3405-56T>G		c.3405-56T>G	intron_variant
267	55089034	rs948300825	G	A	c.3405-61C>T		c.3405-61C>T	intron_variant
268	55089038	rs41446344	T	C	c.3405-65A>G		c.3405-65A>G	intron_variant
269	55089039	rs1228828231	T	C	c.3405-66A>G		c.3405-66A>G	intron_variant
270	55089044	rs41454649	G	A	c.3405-71C>T		c.3405-71C>T	intron_variant
271	55089044	rs41454649	G	T	c.3405-71C>A		c.3405-71C>A	intron_variant
272	55089048		A	G	c.3405-75T>C		c.3405-75T>C	intron_variant
273	55089300	rs1357220934	A	G	c.3404+74T>C		c.3404+74T>C	intron_variant
274	55089313		C	A	c.3404+61G>T		c.3404+61G>T	intron_variant
275	55089319	rs571602372	A	G	c.3404+55T>C		c.3404+55T>C	intron_variant
276	55089326	rs1159983885	A	C	c.3404+48T>G		c.3404+48T>G	intron_variant
277	55089331	rs773178117	C	G	c.3404+43G>C		c.3404+43G>C	intron_variant
278	55089331	rs773178117	C	T	c.3404+43G>A		c.3404+43G>A	intron_variant
279	55089331	rs773178117	C	A	c.3404+43G>T		c.3404+43G>T	intron_variant
280	55089332	rs373547645	G	A	c.3404+42C>T		c.3404+42C>T	intron_variant
281	55089332	rs373547645	G	C	c.3404+42C>G		c.3404+42C>G	intron_variant
282	55089333	rs753701918	A	G	c.3404+41T>C		c.3404+41T>C	intron_variant
283	55089334	rs371072394	G	A	c.3404+40C>T		c.3404+40C>T	intron_variant
284	55089336	rs537932665	A	C	c.3404+38T>G		c.3404+38T>G	intron_variant
285	55089340	rs764995689	A	G	c.3404+34T>C		c.3404+34T>C	intron_variant
286	55089351	rs201876612	A	G	c.3404+23T>C		c.3404+23T>C	intron_variant
287	55089352	rs201529809	G	A	c.3404+22C>T		c.3404+22C>T	intron_variant
288	55089353	rs746468770	G	A	c.3404+21C>T		c.3404+21C>T	intron_variant
289	55089357	rs1267267996	A	T	c.3404+17T>A		c.3404+17T>A	intron_variant
290	55089357		A	G	c.3404+17T>C		c.3404+17T>C	intron_variant
291	55089360	rs911037049	T	C	c.3404+14A>G		c.3404+14A>G	intron_variant
292	55089381	rs192975612	G	A	p.Pro1133Ser	p.Pro1133Ser	c.3397C>T	missense_variant
293	55089384	rs777679428	T	C	p.Thr1132Ala	p.Thr1132Ala	c.3394A>G	missense_variant
294	55089385	rs775848381	A	G	p.Thr1131Thr	p.Thr1131Thr	c.3393T>C	synonymous_variant
295	55089388	rs749481359	A	G	p.Tyr1130Tyr	p.Tyr1130Tyr	c.3390T>C	synonymous_variant
296	55089421	rs267600190	C	G	p.Leu1119Phe	p.Leu1119Phe	c.3357G>C	missense_variant
297	55089425	rs560674167	C	T	p.Arg1118Gln	p.Arg1118Gln	c.3353G>A	missense_variant
298	55089467	rs138424770	G	T	p.Ser1104Tyr	p.Ser1104Tyr	c.3311C>A	missense_variant
299	55089469	rs1052043519	A	C	p.Ala1103Ala	p.Ala1103Ala	c.3309T>G	synonymous_variant
300	55089471	rs752442885	C	A	p.Ala1103Ser	p.Ala1103Ser	c.3307G>T	missense_variant
301	55089485	rs577461270	C	G	c.3305-12G>C		c.3305-12G>C	intron_variant
302	55089490		AGG	A	c.3305-19_3305-18del		c.3305-19_3305-18del	intron_variant
303	55089500	rs546514370	C	A	c.3305-27G>T		c.3305-27G>T	intron_variant
304	55089500	rs546514370	C	G	c.3305-27G>C		c.3305-27G>C	intron_variant
305	55089502	rs373069125	T	C	c.3305-29A>G		c.3305-29A>G	intron_variant
306	55089505		A	G	c.3305-32T>C		c.3305-32T>C	intron_variant
307	55089506	rs756771523	T	C	c.3305-33A>G		c.3305-33A>G	intron_variant
308	55089516	rs1209164308	T	C	c.3305-43A>G		c.3305-43A>G	intron_variant
309	55089528	rs1246657231	CCCTGAG	C	c.3305-61_3305-56del		c.3305-61_3305-56del	intron_variant
310	55089544	rs1013271018	T	G	c.3305-71A>C		c.3305-71A>C	intron_variant
311	55089544	rs1013271018	T	C	c.3305-71A>G		c.3305-71A>G	intron_variant
312	55089617	rs1220471115	G	A	c.3304+74C>T		c.3304+74C>T	intron_variant
313	55089625	rs547802826	G	A	c.3304+66C>T		c.3304+66C>T	intron_variant
314	55089643	rs780263291	G	A	c.3304+48C>T		c.3304+48C>T	intron_variant
315	55089644	rs749609897	T	C	c.3304+47A>G		c.3304+47A>G	intron_variant
316	55089655	rs762391692	G	A	c.3304+36C>T		c.3304+36C>T	intron_variant
317	55089663	rs748282652	G	A	c.3304+28C>T		c.3304+28C>T	intron_variant
318	55089695	rs759365650	G	A	p.Ser1100Ser	p.Ser1100Ser	c.3300C>T	synonymous_variant
319	55089722	rs150647161	A	G	p.Phe1091Phe	p.Phe1091Phe	c.3273T>C	synonymous_variant
320	55089731	rs139806698	G	A	p.Val1088Val	p.Val1088Val	c.3264C>T	synonymous_variant
321	55089733	rs763851452	C	T	p.Val1088Ile	p.Val1088Ile	c.3262G>A	missense_variant
322	55089734	rs149373186	G	A	p.Asp1087Asp	p.Asp1087Asp	c.3261C>T	synonymous_variant
323	55089739		T	C	p.Ser1086Gly	p.Ser1086Gly	c.3256A>G	missense_variant
324	55089754	rs547143040	C	G	p.Val1081Leu	p.Val1081Leu	c.3241G>C	missense_variant
325	55089776	rs1283881899	G	A	p.Ala1073Ala	p.Ala1073Ala	c.3219C>T	synonymous_variant
326	55089779	rs1436824102	C	T	p.Met1072Ile	p.Met1072Ile	c.3216G>A	missense_variant
327	55089786	rs756605099	T	C	p.Lys1070Arg	p.Lys1070Arg	c.3209A>G	missense_variant
328	55089794	rs780574550	G	A	p.Leu1067Leu	p.Leu1067Leu	c.3201C>T	synonymous_variant
329	55089802	rs56302315	C	T	p.Ala1065Thr	p.Ala1065Thr	c.3193G>A	missense_variant
330	55089808		G	A	c.3193-6C>T		c.3193-6C>T	splice_region_variant
331	55089820	rs546857012	A	G	c.3193-18T>C		c.3193-18T>C	intron_variant
332	55089822	rs113426547	G	A	c.3193-20C>T		c.3193-20C>T	intron_variant
333	55089831	rs565966448	A	T	c.3193-29T>A		c.3193-29T>A	intron_variant
334	55089832	rs369949403	C	T	c.3193-30G>A		c.3193-30G>A	intron_variant
335	55089833	rs376192310	C	T	c.3193-31G>A		c.3193-31G>A	intron_variant
336	55089834	rs370272521	C	T	c.3193-32G>A		c.3193-32G>A	intron_variant
337	55089849	rs749936978	C	T	c.3193-47G>A		c.3193-47G>A	intron_variant
338	55089854		GA	G	c.3193-53del		c.3193-53del	intron_variant
339	55089855		A	G	c.3193-53T>C		c.3193-53T>C	intron_variant
340	55089862	rs935233638	C	T	c.3193-60G>A		c.3193-60G>A	intron_variant
341	55089862		CT	C	c.3193-61del		c.3193-61del	intron_variant
342	55089871	rs1314017470	T	C	c.3193-69A>G		c.3193-69A>G	intron_variant
343	55089872	rs1269363668	TC	T	c.3193-71del		c.3193-71del	intron_variant
344	55089883	rs961811876	G	A	c.3192+73C>T		c.3192+73C>T	intron_variant
345	55089884	rs971866210	G	A	c.3192+72C>T		c.3192+72C>T	intron_variant
346	55089892	rs1052326806	G	T	c.3192+64C>A		c.3192+64C>A	intron_variant
347	55089899	rs896131867	A	G	c.3192+57T>C		c.3192+57T>C	intron_variant
348	55089900	rs879532547	C	T	c.3192+56G>A		c.3192+56G>A	intron_variant
349	55089901	rs904946773	GA	G	c.3192+54del		c.3192+54del	intron_variant
350	55089901	rs1044761522	G	A	c.3192+55C>T		c.3192+55C>T	intron_variant
351	55089901		G	T	c.3192+55C>A		c.3192+55C>A	intron_variant
352	55089902		A	C	c.3192+54T>G		c.3192+54T>G	intron_variant
353	55089906	rs760167687	G	C	c.3192+50C>G		c.3192+50C>G	intron_variant
354	55089906	rs760167687	G	A	c.3192+50C>T		c.3192+50C>T	intron_variant
355	55089907	rs1578128360	T	A	c.3192+49A>T		c.3192+49A>T	intron_variant
356	55089908		T	G	c.3192+48A>C		c.3192+48A>C	intron_variant
357	55089909	rs1236345670	T	G	c.3192+47A>C		c.3192+47A>C	intron_variant
358	55089913	rs367665921	TTC	T	c.3192+41_3192+42del		c.3192+41_3192+42del	intron_variant
359	55089931	rs754335341	C	T	c.3192+25G>A		c.3192+25G>A	intron_variant
360	55089933	rs755373129	C	T	c.3192+23G>A		c.3192+23G>A	intron_variant
361	55089936	rs200516814	G	C	c.3192+20C>G		c.3192+20C>G	intron_variant
362	55089942	rs1560514115	T	C	c.3192+14A>G		c.3192+14A>G	intron_variant
363	55089949	rs377518130	A	T	c.3192+7T>A		c.3192+7T>A	splice_region_variant
364	55089958	rs139868970	C	T	p.Asp1064Asn	p.Asp1064Asn	c.3190G>A	missense_variant
365	55089968	rs1227013950	G	A	p.Val1060Val	p.Val1060Val	c.3180C>T	synonymous_variant
366	55089997	rs780209077	G	A	p.Arg1051Trp	p.Arg1051Trp	c.3151C>T	missense_variant
367	55090016	rs145298133	G	T	p.Ile1044Ile	p.Ile1044Ile	c.3132C>A	synonymous_variant
368	55090027	rs922679946	C	T	p.Val1041Met	p.Val1041Met	c.3121G>A	missense_variant
369	55090028	rs774311648	G	A	p.Asn1040Asn	p.Asn1040Asn	c.3120C>T	synonymous_variant
370	55090031	rs747938782	C	T	p.Lys1039Lys	p.Lys1039Lys	c.3117G>A	synonymous_variant
371	55090037	rs147630437	C	T	p.Ser1037Ser	p.Ser1037Ser	c.3111G>A	synonymous_variant
372	55090038	rs148668147	G	A	p.Ser1037Leu	p.Ser1037Leu	c.3110C>T	missense_variant
373	55090058	rs36114464	C	T	p.Ala1030Ala	p.Ala1030Ala	c.3090G>A	synonymous_variant
374	55090063	rs777166403	G	A	p.Leu1029Leu	p.Leu1029Leu	c.3085C>T	synonymous_variant
375	55090073	rs371312376	G	A	p.Ile1025Ile	p.Ile1025Ile	c.3075C>T	synonymous_variant
376	55090092	rs767035218	CAT	C	c.3070-16_3070-15del		c.3070-16_3070-15del	intron_variant
377	55090110	rs753006598	C	T	c.3070-32G>A		c.3070-32G>A	intron_variant
378	55090111	rs375011829	G	A	c.3070-33C>T		c.3070-33C>T	intron_variant
379	55090118	rs569874460	C	T	c.3070-40G>A		c.3070-40G>A	intron_variant
380	55090134	rs1464760328	C	CT	c.3070-57dup		c.3070-57dup	intron_variant
381	55090142	rs894072231	A	G	c.3070-64T>C		c.3070-64T>C	intron_variant
382	55090143		C	A	c.3070-65G>T		c.3070-65G>T	intron_variant
383	55090148	rs1247654434	T	C	c.3070-70A>G		c.3070-70A>G	intron_variant
384	55090151	rs1045141000	A	G	c.3070-73T>C		c.3070-73T>C	intron_variant
385	55090153	rs935197994	C	CA	c.3070-76dup		c.3070-76dup	intron_variant
386	55090153	rs935197994	CA	C	c.3070-76del		c.3070-76del	intron_variant
387	55092542	rs751872282	A	G	c.3069+75T>C		c.3069+75T>C	intron_variant
388	55092543		T	C	c.3069+74A>G		c.3069+74A>G	intron_variant
389	55092544		G	A	c.3069+73C>T		c.3069+73C>T	intron_variant
390	55092546		C	T	c.3069+71G>A		c.3069+71G>A	intron_variant
391	55092550	rs139243978	C	T	c.3069+67G>A		c.3069+67G>A	intron_variant
392	55092551		A	C	c.3069+66T>G		c.3069+66T>G	intron_variant
393	55092553	rs932169178	T	G	c.3069+64A>C		c.3069+64A>C	intron_variant
394	55092553	rs932169178	T	C	c.3069+64A>G		c.3069+64A>G	intron_variant
395	55092559	rs551409897	T	C	c.3069+58A>G		c.3069+58A>G	intron_variant
396	55092560		C	A	c.3069+57G>T		c.3069+57G>T	intron_variant
397	55092577	rs115350631	G	A	c.3069+40C>T		c.3069+40C>T	intron_variant
398	55092577	rs115350631	G	C	c.3069+40C>G		c.3069+40C>G	intron_variant
399	55092583	rs745895611	A	C	c.3069+34T>G		c.3069+34T>G	intron_variant
400	55092585	rs755000007	A	T	c.3069+32T>A		c.3069+32T>A	intron_variant
401	55092587	rs1414865810	G	A	c.3069+30C>T		c.3069+30C>T	intron_variant
402	55092590		A	G	c.3069+27T>C		c.3069+27T>C	intron_variant
403	55092595	rs778930086	A	T	c.3069+22T>A		c.3069+22T>A	intron_variant
404	55092611	rs921819955	T	C	c.3069+6A>G		c.3069+6A>G	splice_region_variant
405	55092621	rs780764266	C	T	p.Arg1022Gln	p.Arg1022Gln	c.3065G>A	missense_variant
406	55092623	rs56203006	C	T	p.Ser1021Ser	p.Ser1021Ser	c.3063G>A	synonymous_variant
407	55092624		G	A	p.Ser1021Leu	p.Ser1021Leu	c.3062C>T	missense_variant
408	55092636	rs201783414	T	A	p.Glu1017Val	p.Glu1017Val	c.3050A>T	missense_variant
409	55092640		T	C	p.Met1016Val	p.Met1016Val	c.3046A>G	missense_variant
410	55092647	rs1305887197	A	T	p.Ala1013Ala	p.Ala1013Ala	c.3039T>A	synonymous_variant
411	55092676	rs151189348	G	T	p.His1004Asn	p.His1004Asn	c.3010C>A	missense_variant
412	55092698	rs373458164	A	G	p.Tyr996Tyr	p.Tyr996Tyr	c.2988T>C	synonymous_variant
413	55092699	rs892780242	T	A	p.Tyr996Phe	p.Tyr996Phe	c.2987A>T	missense_variant
414	55092699	rs892780242	T	C	p.Tyr996Cys	p.Tyr996Cys	c.2987A>G	missense_variant
415	55092707		T	C	p.Glu993Glu	p.Glu993Glu	c.2979A>G	synonymous_variant
416	55092715	rs762149605	C	A	c.2972-1G>T		c.2972-1G>T	splice_acceptor_variant
417	55092720	rs201968542	C	G	c.2972-6G>C		c.2972-6G>C	splice_region_variant
418	55092739	rs111438501	A	G	c.2972-25T>C		c.2972-25T>C	intron_variant
419	55092740	rs752679840	G	A	c.2972-26C>T		c.2972-26C>T	intron_variant
420	55092751	rs1002661356	C	T	c.2972-37G>A		c.2972-37G>A	intron_variant
421	55092754	rs368902888	T	C	c.2972-40A>G		c.2972-40A>G	intron_variant
422	55092763	rs184000087	G	A	c.2972-49C>T		c.2972-49C>T	intron_variant
423	55092766	rs375082311	A	G	c.2972-52T>C		c.2972-52T>C	intron_variant
424	55092766		A	C	c.2972-52T>G		c.2972-52T>G	intron_variant
425	55092774	rs1361238204	A	T	c.2972-60T>A		c.2972-60T>A	intron_variant
426	55092781	rs1312445195	C	T	c.2972-67G>A		c.2972-67G>A	intron_variant
427	55094730	rs142200082	C	T	c.2971+72G>A		c.2971+72G>A	intron_variant
428	55094739	rs1413759482	C	G	c.2971+63G>C		c.2971+63G>C	intron_variant
429	55094744	rs1304721527	T	A	c.2971+58A>T		c.2971+58A>T	intron_variant
430	55094751	rs190464969	G	A	c.2971+51C>T		c.2971+51C>T	intron_variant
431	55094755	rs377341213	G	A	c.2971+47C>T		c.2971+47C>T	intron_variant
432	55094756	rs775902098	C	G	c.2971+46G>C		c.2971+46G>C	intron_variant
433	55094758	rs948753164	C	T	c.2971+44G>A		c.2971+44G>A	intron_variant
434	55094768		C	G	c.2971+34G>C		c.2971+34G>C	intron_variant
435	55094768	rs766482143	C	T	c.2971+34G>A		c.2971+34G>A	intron_variant
436	55094770	rs774811476	T	C	c.2971+32A>G		c.2971+32A>G	intron_variant
437	55094770		T	A	c.2971+32A>T		c.2971+32A>T	intron_variant
438	55094775	rs998260811	T	C	c.2971+27A>G		c.2971+27A>G	intron_variant
439	55094776	rs1397158280	A	G	c.2971+26T>C		c.2971+26T>C	intron_variant
440	55094778		C	T	c.2971+24G>A		c.2971+24G>A	intron_variant
441	55094783	rs1198266889	A	G	c.2971+19T>C		c.2971+19T>C	intron_variant
442	55094785	rs201223889	G	A	c.2971+17C>T		c.2971+17C>T	intron_variant
443	55094789	rs753807774	C	A	c.2971+13G>T		c.2971+13G>T	intron_variant
444	55094792	rs1342115056	T	A	c.2971+10A>T		c.2971+10A>T	intron_variant
445	55094799	rs1037612393	T	C	c.2971+3A>G		c.2971+3A>G	splice_region_variant
446	55094801		C	A	c.2971+1G>T		c.2971+1G>T	splice_donor_variant
447	55094814	rs780889750	C	T	p.Glu987Lys	p.Glu987Lys	c.2959G>A	missense_variant
448	55094818		A	G	p.Asp985Asp	p.Asp985Asp	c.2955T>C	synonymous_variant
449	55094819	rs931465705	T	C	p.Asp985Gly	p.Asp985Gly	c.2954A>G	missense_variant
450	55094821	rs745489015	A	G	p.Ser984Ser	p.Ser984Ser	c.2952T>C	synonymous_variant
451	55094826		G	A	p.Leu983Phe	p.Leu983Phe	c.2947C>T	missense_variant
452	55094837	rs565322828	T	C	p.Glu979Gly	p.Glu979Gly	c.2936A>G	missense_variant
453	55094853	rs1048710278	T	A	p.Ser974Cys	p.Ser974Cys	c.2920A>T	missense_variant
454	55094854	rs181661220	G	A	p.Ala973Ala	p.Ala973Ala	c.2919C>T	synonymous_variant
455	55094886	rs544842346	A	G	p.Leu963Leu	p.Leu963Leu	c.2887T>C	synonymous_variant
456	55094888	rs1229432573	C	T	p.Arg962His	p.Arg962His	c.2885G>A	missense_variant
457	55094889	rs1312670638	G	A	p.Arg962Cys	p.Arg962Cys	c.2884C>T	missense_variant
458	55094891	rs199904772	C	T	p.Arg961Gln	p.Arg961Gln	c.2882G>A	missense_variant
459	55094892	rs530419081	G	A	p.Arg961Trp	p.Arg961Trp	c.2881C>T	missense_variant
460	55094905	rs759473733	A	C	p.Pro956Pro	p.Pro956Pro	c.2868T>G	synonymous_variant
461	55094905	rs759473733	A	G	p.Pro956Pro	p.Pro956Pro	c.2868T>C	synonymous_variant
462	55094910	rs201830601	T	C	p.Ile955Val	p.Ile955Val	c.2863A>G	missense_variant
463	55094912	rs560132579	G	A	p.Ala954Val	p.Ala954Val	c.2861C>T	missense_variant
464	55094913	rs757083292	C	T	p.Ala954Thr	p.Ala954Thr	c.2860G>A	missense_variant
465	55094919	rs13129474	C	T	p.Val952Ile	p.Val952Ile	c.2854G>A	missense_variant
466	55094920	rs201374419	G	A	p.Tyr951Tyr	p.Tyr951Tyr	c.2853C>T	synonymous_variant
467	55094923	rs376761137	G	A	p.Asp950Asp	p.Asp950Asp	c.2850C>T	synonymous_variant
468	55094936	rs140041720	C	T	p.Arg946His	p.Arg946His	c.2837G>A	missense_variant
469	55094937	rs371148535	G	A	p.Arg946Cys	p.Arg946Cys	c.2836C>T	missense_variant
470	55094938	rs1243166641	G	A	p.Phe945Phe	p.Phe945Phe	c.2835C>T	synonymous_variant
471	55094942	rs374755237	C	T	p.Arg944Gln	p.Arg944Gln	c.2831G>A	missense_variant
472	55094942	rs374755237	C	A	p.Arg944Leu	p.Arg944Leu	c.2831G>T	missense_variant
473	55094954	rs773739287	G	A	p.Thr940Ile	p.Thr940Ile	c.2819C>T	missense_variant
474	55094960	rs1338761514	A	G	c.2818-5T>C		c.2818-5T>C	splice_region_variant
475	55094976		A	G	c.2818-21T>C		c.2818-21T>C	intron_variant
476	55094984	rs368284903	T	C	c.2818-29A>G		c.2818-29A>G	intron_variant
477	55094986	rs368765969	C	T	c.2818-31G>A		c.2818-31G>A	intron_variant
478	55094989		GAATACAA	G	c.2818-41_2818-35del		c.2818-41_2818-35del	intron_variant
479	55094992	rs2219471	T	C	c.2818-37A>G		c.2818-37A>G	intron_variant
480	55095002	rs41462045	G	A	c.2818-47C>T		c.2818-47C>T	intron_variant
481	55095005	rs186792060	T	G	c.2818-50A>C		c.2818-50A>C	intron_variant
482	55095008		A	G	c.2818-53T>C		c.2818-53T>C	intron_variant
483	55095020	rs928616617	C	A	c.2818-65G>T		c.2818-65G>T	intron_variant
484	55095027	rs938765464	A	C	c.2818-72T>G		c.2818-72T>G	intron_variant
485	55095502	rs1265565643	A	G	c.2817+75T>C		c.2817+75T>C	intron_variant
486	55095503	rs1043419220	A	T	c.2817+74T>A		c.2817+74T>A	intron_variant
487	55095505	rs931357761	A	C	c.2817+72T>G		c.2817+72T>G	intron_variant
488	55095511	rs1316066929	C	T	c.2817+66G>A		c.2817+66G>A	intron_variant
489	55095516	rs1290524356	AC	A	c.2817+60del		c.2817+60del	intron_variant
490	55095518	rs1229894265	C	A	c.2817+59G>T		c.2817+59G>T	intron_variant
491	55095522	rs567956211	T	C	c.2817+55A>G		c.2817+55A>G	intron_variant
492	55095524	rs984297851	G	T	c.2817+53C>A		c.2817+53C>A	intron_variant
493	55095526	rs367621308	G	A	c.2817+51C>T		c.2817+51C>T	intron_variant
494	55095526	rs367621308	G	C	c.2817+51C>G		c.2817+51C>G	intron_variant
495	55095528	rs182660997	T	C	c.2817+49A>G		c.2817+49A>G	intron_variant
496	55095544	rs753431648	A	G	c.2817+33T>C		c.2817+33T>C	intron_variant
497	55095547		T	C	c.2817+30A>G		c.2817+30A>G	intron_variant
498	55095551	rs200331741	C	T	c.2817+26G>A		c.2817+26G>A	intron_variant
499	55095556	rs375948061	C	A	c.2817+21G>T		c.2817+21G>T	intron_variant
500	55095558	rs758974987	G	A	c.2817+19C>T		c.2817+19C>T	intron_variant
501	55095562	rs562331098	TAGG	T	c.2817+12_2817+14del		c.2817+12_2817+14del	intron_variant
502	55095568	rs369975915	A	G	c.2817+9T>C		c.2817+9T>C	intron_variant
503	55095570	rs747462553	G	T	c.2817+7C>A		c.2817+7C>A	splice_region_variant
504	55095572		C	T	c.2817+5G>A		c.2817+5G>A	splice_region_variant
505	55095578	rs776950924	T	C	p.Lys939Arg	p.Lys939Arg	c.2816A>G	missense_variant
506	55095581	rs746055466	T	C	p.Tyr938Cys	p.Tyr938Cys	c.2813A>G	missense_variant
507	55095585		G	C	p.Pro937Ala	p.Pro937Ala	c.2809C>G	missense_variant
508	55095601	rs893568533	C	T	p.Lys931Lys	p.Lys931Lys	c.2793G>A	synonymous_variant
509	55095605	rs762955301	C	T	p.Ser930Asn	p.Ser930Asn	c.2789G>A	missense_variant
510	55095607	rs1478164101	C	T	p.Arg929Arg	p.Arg929Arg	c.2787G>A	synonymous_variant
511	55095608	rs1355087765	C	T	p.Arg929Lys	p.Arg929Lys	c.2786G>A	missense_variant
512	55095621		A	T	p.Ser925Thr	p.Ser925Thr	c.2773T>A	missense_variant
513	55095622		C	G	p.Leu924Leu	p.Leu924Leu	c.2772G>C	synonymous_variant
514	55095640	rs1451741463	G	A	p.Phe918Phe	p.Phe918Phe	c.2754C>T	synonymous_variant
515	55095651	rs140228618	T	C	p.Ile915Val	p.Ile915Val	c.2743A>G	missense_variant
516	55095658	rs41452948	G	A	p.Leu912Leu	p.Leu912Leu	c.2736C>T	synonymous_variant
517	55095665	rs1272441576	C	G	p.Gly910Ala	p.Gly910Ala	c.2729G>C	missense_variant
518	55095675	rs757966720	G	A	c.2729-10C>T		c.2729-10C>T	intron_variant
519	55095678		T	A	c.2729-13A>T		c.2729-13A>T	intron_variant
520	55095687	rs377171726	A	G	c.2729-22T>C		c.2729-22T>C	intron_variant
521	55095693		A	C	c.2729-28T>G		c.2729-28T>G	intron_variant
522	55095694		T	C	c.2729-29A>G		c.2729-29A>G	intron_variant
523	55095706	rs41480844	C	T	c.2729-41G>A		c.2729-41G>A	intron_variant
524	55095707	rs41279527	A	G	c.2729-42T>C		c.2729-42T>C	intron_variant
525	55095708	rs746203718	T	C	c.2729-43A>G		c.2729-43A>G	intron_variant
526	55095709	rs987089822	A	G	c.2729-44T>C		c.2729-44T>C	intron_variant
527	55095710	rs1250172557	T	C	c.2729-45A>G		c.2729-45A>G	intron_variant
528	55095722	rs962250590	C	A	c.2729-57G>T		c.2729-57G>T	intron_variant
529	55095722	rs962250590	C	T	c.2729-57G>A		c.2729-57G>A	intron_variant
530	55095723	rs41279529	G	A	c.2729-58C>T		c.2729-58C>T	intron_variant
531	55095724	rs1466221157	T	TTTATA	c.2729-60_2729-59insTATAA		c.2729-60_2729-59insTATAA	intron_variant
532	55095729	rs1043366677	T	C	c.2729-64A>G		c.2729-64A>G	intron_variant
533	55096156	rs1008087184	G	A	c.2728+73C>T		c.2728+73C>T	intron_variant
534	55096162		T	C	c.2728+67A>G		c.2728+67A>G	intron_variant
535	55096165	rs17085274	C	A	c.2728+64G>T		c.2728+64G>T	intron_variant
536	55096165	rs17085274	C	T	c.2728+64G>A		c.2728+64G>A	intron_variant
537	55096171	rs1212887811	AAC	A	c.2728+56_2728+57del		c.2728+56_2728+57del	intron_variant
538	55096183	rs376146102	G	A	c.2728+46C>T		c.2728+46C>T	intron_variant
539	55096188	rs749430010	A	G	c.2728+41T>C		c.2728+41T>C	intron_variant
540	55096189	rs1317436834	T	C	c.2728+40A>G		c.2728+40A>G	intron_variant
541	55096191	rs10517340	T	C	c.2728+38A>G		c.2728+38A>G	intron_variant
542	55096194		A	C	c.2728+35T>G		c.2728+35T>G	intron_variant
543	55096196	rs1392829946	A	C	c.2728+33T>G		c.2728+33T>G	intron_variant
544	55096197	rs773245043	T	C	c.2728+32A>G		c.2728+32A>G	intron_variant
545	55096206	rs374056838	C	T	c.2728+23G>A		c.2728+23G>A	intron_variant
546	55096211		C	T	c.2728+18G>A		c.2728+18G>A	intron_variant
547	55096218	rs367947655	C	A	c.2728+11G>T		c.2728+11G>T	intron_variant
548	55096220	rs979290062	G	A	c.2728+9C>T		c.2728+9C>T	intron_variant
549	55096225		T	A	c.2728+4A>T		c.2728+4A>T	splice_region_variant
550	55096235	rs1269561545	G	A	p.Pro908Ser	p.Pro908Ser	c.2722C>T	missense_variant
551	55096245	rs1474257527	G	A	p.Ala904Ala	p.Ala904Ala	c.2712C>T	synonymous_variant
552	55096247	rs1209741730	C	T	p.Ala904Thr	p.Ala904Thr	c.2710G>A	missense_variant
553	55096266	rs79614820	A	G	p.Asn897Asn	p.Asn897Asn	c.2691T>C	synonymous_variant
554	55096272	rs762590320	A	G	p.His895His	p.His895His	c.2685T>C	synonymous_variant
555	55096274		G	A	p.His895Tyr	p.His895Tyr	c.2683C>T	missense_variant
556	55096276	rs763673357	T	C	p.His894Arg	p.His894Arg	c.2681A>G	missense_variant
557	55096277	rs1427460930	G	A	p.His894Tyr	p.His894Tyr	c.2680C>T	missense_variant
558	55096280	rs987815688	C	G	p.Gly893Arg	p.Gly893Arg	c.2677G>C	missense_variant
559	55096289	rs1458003612	T	C	p.Ile890Val	p.Ile890Val	c.2668A>G	missense_variant
560	55096293	rs1190899437	G	A	p.Ile888Ile	p.Ile888Ile	c.2664C>T	synonymous_variant
561	55096295	rs371597053	T	A	p.Ile888Phe	p.Ile888Phe	c.2662A>T	missense_variant
562	55096318	rs368407075	C	A	p.Arg880Leu	p.Arg880Leu	c.2639G>T	missense_variant
563	55096321	rs1334660400	T	A	p.His879Leu	p.His879Leu	c.2636A>T	missense_variant
564	55096329	rs1258858205	G	A	p.His876His	p.His876His	c.2628C>T	synonymous_variant
565	55096337	rs1172794960	C	T	p.Ala874Thr	p.Ala874Thr	c.2620G>A	missense_variant
566	55096339	rs780022671	C	T	p.Gly873Glu	p.Gly873Glu	c.2618G>A	missense_variant
567	55096339	rs780022671	C	G	p.Gly873Ala	p.Gly873Ala	c.2618G>C	missense_variant
568	55096352		C	T	c.2615-10G>A		c.2615-10G>A	intron_variant
569	55096355	rs375253114	T	C	c.2615-13A>G		c.2615-13A>G	intron_variant
570	55096359	rs749483417	A	C	c.2615-17T>G		c.2615-17T>G	intron_variant
571	55096363	rs755103201	G	T	c.2615-21C>A		c.2615-21C>A	intron_variant
572	55096368		A	C	c.2615-26T>G		c.2615-26T>G	intron_variant
573	55096369	rs1301165745	T	C	c.2615-27A>G		c.2615-27A>G	intron_variant
574	55096370	rs748188270	C	T	c.2615-28G>A		c.2615-28G>A	intron_variant
575	55096374	rs770783268	G	T	c.2615-32C>A		c.2615-32C>A	intron_variant
576	55096378	rs1578131263	T	G	c.2615-36A>C		c.2615-36A>C	intron_variant
577	55096378	rs3214870	T	TG	c.2615-37dup		c.2615-37dup	intron_variant
578	55096380	rs1466877605	GA	G	c.2615-39del		c.2615-39del	intron_variant
579	55096381	rs1560516242	A	G	c.2615-39T>C		c.2615-39T>C	intron_variant
580	55096382	rs1181310395	C	G	c.2615-40G>C		c.2615-40G>C	intron_variant
581	55096392	rs202176656	A	AG	c.2615-51_2615-50insC		c.2615-51_2615-50insC	intron_variant
582	55096397	rs1322688377	T	C	c.2615-55A>G		c.2615-55A>G	intron_variant
583	55096401	rs942181825	G	A	c.2615-59C>T		c.2615-59C>T	intron_variant
584	55096404	rs1037921251	C	A	c.2615-62G>T		c.2615-62G>T	intron_variant
585	55096417	rs926409777	C	A	c.2615-75G>T		c.2615-75G>T	intron_variant
586	55097590		A	C	c.2614+72T>G		c.2614+72T>G	intron_variant
587	55097591	rs1285335417	T	TA	c.2614+70dup		c.2614+70dup	intron_variant
588	55097593	rs957655532	C	T	c.2614+69G>A		c.2614+69G>A	intron_variant
589	55097597	rs563532336	C	T	c.2614+65G>A		c.2614+65G>A	intron_variant
590	55097600	rs1445524799	T	C	c.2614+62A>G		c.2614+62A>G	intron_variant
591	55097606	rs1218264426	A	G	c.2614+56T>C		c.2614+56T>C	intron_variant
592	55097612	rs1374765465	A	T	c.2614+50T>A		c.2614+50T>A	intron_variant
593	55097615	rs368235717	G	C	c.2614+47C>G		c.2614+47C>G	intron_variant
594	55097629	rs773739674	G	A	c.2614+33C>T		c.2614+33C>T	intron_variant
595	55097637	rs1304681437	G	A	c.2614+25C>T		c.2614+25C>T	intron_variant
596	55097685		G	A	p.Thr864Ile	p.Thr864Ile	c.2591C>T	missense_variant
597	55097690	rs754157183	G	A	p.Cys862Cys	p.Cys862Cys	c.2586C>T	synonymous_variant
598	55097694	rs1202865854	G	C	p.Thr861Ser	p.Thr861Ser	c.2582C>G	missense_variant
599	55097699	rs544496628	T	C	p.Thr859Thr	p.Thr859Thr	c.2577A>G	synonymous_variant
600	55097713	rs758497778	C	T	p.Gly855Arg	p.Gly855Arg	c.2563G>A	missense_variant
601	55097714	rs1234810020	A	G	p.Phe854Phe	p.Phe854Phe	c.2562T>C	synonymous_variant
602	55097718	rs1353154679	G	A	p.Ala853Val	p.Ala853Val	c.2558C>T	missense_variant
603	55097720	rs1452361609	A	G	p.Asp852Asp	p.Asp852Asp	c.2556T>C	synonymous_variant
604	55097738	rs913262624	G	A	p.Gly846Gly	p.Gly846Gly	c.2538C>T	synonymous_variant
605	55097748		C	T	p.Gly843Asp	p.Gly843Asp	c.2528G>A	missense_variant
606	55097751	rs149901681	C	T	p.Arg842His	p.Arg842His	c.2525G>A	missense_variant
607	55097752	rs41469552	G	T	p.Arg842Ser	p.Arg842Ser	c.2524C>A	missense_variant
608	55097752	rs41469552	G	A	p.Arg842Cys	p.Arg842Cys	c.2524C>T	missense_variant
609	55097756	rs548601458	A	G	p.Leu840Leu	p.Leu840Leu	c.2520T>C	synonymous_variant
610	55097760	rs140761530	G	A	p.Pro839Leu	p.Pro839Leu	c.2516C>T	missense_variant
611	55097763	rs761298513	T	C	p.Lys838Arg	p.Lys838Arg	c.2513A>G	missense_variant
612	55097771	rs1300371326	A	G	c.2510-5T>C		c.2510-5T>C	splice_region_variant
613	55097773	rs753680159	TCAA	T	c.2510-10_2510-8del		c.2510-10_2510-8del	splice_region_variant
614	55097777	rs368156548	C	T	c.2510-11G>A		c.2510-11G>A	intron_variant
615	55097780		C	T	c.2510-14G>A		c.2510-14G>A	intron_variant
616	55097789		C	T	c.2510-23G>A		c.2510-23G>A	intron_variant
617	55097796	rs1217474492	A	G	c.2510-30T>C		c.2510-30T>C	intron_variant
618	55097797	rs1260988565	C	T	c.2510-31G>A		c.2510-31G>A	intron_variant
619	55097800	rs766836126	A	C	c.2510-34T>G		c.2510-34T>G	intron_variant
620	55097813	rs527773411	T	C	c.2510-47A>G		c.2510-47A>G	intron_variant
621	55097815	rs1202880670	C	T	c.2510-49G>A		c.2510-49G>A	intron_variant
622	55097816	rs200665607	A	G	c.2510-50T>C		c.2510-50T>C	intron_variant
623	55097820	rs1214993442	A	G	c.2510-54T>C		c.2510-54T>C	intron_variant
624	55097825	rs964432793	G	T	c.2510-59C>A		c.2510-59C>A	intron_variant
625	55097829	rs570946461	C	T	c.2510-63G>A		c.2510-63G>A	intron_variant
626	55097829	rs570946461	C	G	c.2510-63G>C		c.2510-63G>C	intron_variant
627	55097830	rs886124941	G	A	c.2510-64C>T		c.2510-64C>T	intron_variant
628	55097831	rs539611115	C	T	c.2510-65G>A		c.2510-65G>A	intron_variant
629	55097832	rs1348696161	A	G	c.2510-66T>C		c.2510-66T>C	intron_variant
630	55097833	rs1225531920	G	A	c.2510-67C>T		c.2510-67C>T	intron_variant
631	55097839		T	C	c.2510-73A>G		c.2510-73A>G	intron_variant
632	55098073		T	C	c.2509+64A>G		c.2509+64A>G	intron_variant
633	55098075	rs1280153087	C	T	c.2509+62G>A		c.2509+62G>A	intron_variant
634	55098083		G	C	c.2509+54C>G		c.2509+54C>G	intron_variant
635	55098087		G	C	c.2509+50C>G		c.2509+50C>G	intron_variant
636	55098094		C	T	c.2509+43G>A		c.2509+43G>A	intron_variant
637	55098096	rs927366072	T	C	c.2509+41A>G		c.2509+41A>G	intron_variant
638	55098105	rs758454497	C	A	c.2509+32G>T		c.2509+32G>T	intron_variant
639	55098107	rs949574042	A	G	c.2509+30T>C		c.2509+30T>C	intron_variant
640	55098125	rs377223097	T	C	c.2509+12A>G		c.2509+12A>G	intron_variant
641	55098141	rs1139775	C	T	p.Lys835Lys	p.Lys835Lys	c.2505G>A	synonymous_variant
642	55098144	rs1193004345	C	T	p.Leu834Leu	p.Leu834Leu	c.2502G>A	synonymous_variant
643	55098149	rs1224362892	G	A	p.Arg833Trp	p.Arg833Trp	c.2497C>T	missense_variant
644	55098150	rs1333054590	G	A	p.Asp832Asp	p.Asp832Asp	c.2496C>T	synonymous_variant
645	55098158	rs145905001	G	A	p.Pro830Ser	p.Pro830Ser	c.2488C>T	missense_variant
646	55098158	rs145905001	G	T	p.Pro830Thr	p.Pro830Thr	c.2488C>A	missense_variant
647	55098168	rs1475215673	T	C	p.Lys826Lys	p.Lys826Lys	c.2478A>G	synonymous_variant
648	55098175	rs1047652051	G	C	p.Ala824Gly	p.Ala824Gly	c.2471C>G	missense_variant
649	55098176	rs368993683	C	T	p.Ala824Thr	p.Ala824Thr	c.2470G>A	missense_variant
650	55098180	rs142597120	A	G	p.Tyr822Tyr	p.Tyr822Tyr	c.2466T>C	synonymous_variant
651	55098187	rs778887745	AGTC	A	p.Arg819del	p.Arg819del	c.2456_2458del	inframe_deletion
652	55098190	rs777094701	C	T	p.Arg819Gln	p.Arg819Gln	c.2456G>A	missense_variant
653	55098197	rs1396871392	A	C	p.Cys817Gly	p.Cys817Gly	c.2449T>G	missense_variant
654	55098198	rs369501886	A	C	p.His816Gln	p.His816Gln	c.2448T>G	missense_variant
655	55098202	rs201191476	T	G	p.Glu815Ala	p.Glu815Ala	c.2444A>C	missense_variant
656	55098206	rs35603373	C	T	p.Asp814Asn	p.Asp814Asn	c.2440G>A	missense_variant
657	55098208	rs200045224	A	C	p.Leu813Trp	p.Leu813Trp	c.2438T>G	missense_variant
658	55098215	rs764372658	G	T	p.Leu811Ile	p.Leu811Ile	c.2431C>A	missense_variant
659	55098218	rs995900977	C	G	p.Glu810Gln	p.Glu810Gln	c.2428G>C	missense_variant
660	55098219	rs751712488	A	C	p.Asp809Glu	p.Asp809Glu	c.2427T>G	missense_variant
661	55098233	rs149212892	C	T	p.Val805Ile	p.Val805Ile	c.2413G>A	missense_variant
662	55098234	rs376232942	G	T	p.Ile804Ile	p.Ile804Ile	c.2412C>A	synonymous_variant
663	55098234	rs376232942	G	A	p.Ile804Ile	p.Ile804Ile	c.2412C>T	synonymous_variant
664	55098237	rs369411727	G	A	p.Ser803Ser	p.Ser803Ser	c.2409C>T	synonymous_variant
665	55098239	rs1418852610	A	T	p.Ser803Thr	p.Ser803Thr	c.2407T>A	missense_variant
666	55098247	rs995912345	C	A	p.Gly800Val	p.Gly800Val	c.2399G>T	missense_variant
667	55098257	rs1378386737	G	C	p.Leu797Val	p.Leu797Val	c.2389C>G	missense_variant
668	55098262	rs747827262	C	G	p.Gly795Ala	p.Gly795Ala	c.2384G>C	missense_variant
669	55098263	rs564385300	C	T	p.Gly795Arg	p.Gly795Arg	c.2383G>A	missense_variant
670	55098268	rs200147160	T	C	p.Asn793Ser	p.Asn793Ser	c.2378A>G	missense_variant
671	55098272		C	T	p.Ala792Thr	p.Ala792Thr	c.2374G>A	missense_variant
672	55098286		A	AATTATACAAAT	c.2374-15_2374-14insATTTGTATAAT		c.2374-15_2374-14insATTTGTATAAT	intron_variant
673	55098286	rs373566947	A	G	c.2374-14T>C		c.2374-14T>C	intron_variant
674	55098292	rs1210007901	C	T	c.2374-20G>A		c.2374-20G>A	intron_variant
675	55098296	rs1461688010	T	C	c.2374-24A>G		c.2374-24A>G	intron_variant
676	55098307	rs1010879032	CT	C	c.2374-36del		c.2374-36del	intron_variant
677	55098333		C	T	c.2374-61G>A		c.2374-61G>A	intron_variant
678	55098336	rs1578132074	G	C	c.2374-64C>G		c.2374-64C>G	intron_variant
679	55098338		T	C	c.2374-66A>G		c.2374-66A>G	intron_variant
680	55098340		T	C	c.2374-68A>G		c.2374-68A>G	intron_variant
681	55098343	rs1226438515	C	G	c.2374-71G>C		c.2374-71G>C	intron_variant
682	55098345	rs1256086488	G	A	c.2374-73C>T		c.2374-73C>T	intron_variant
683	55098346		T	C	c.2374-74A>G		c.2374-74A>G	intron_variant
684	55098627		A	C	c.2373+70T>G		c.2373+70T>G	intron_variant
685	55098628		G	C	c.2373+69C>G		c.2373+69C>G	intron_variant
686	55098631		C	T	c.2373+66G>A		c.2373+66G>A	intron_variant
687	55098639		A	G	c.2373+58T>C		c.2373+58T>C	intron_variant
688	55098647		T	A	c.2373+50A>T		c.2373+50A>T	intron_variant
689	55098661	rs762049331	C	A	c.2373+36G>T		c.2373+36G>T	intron_variant
690	55098664	rs573913096	T	C	c.2373+33A>G		c.2373+33A>G	intron_variant
691	55098668	rs41498047	C	T	c.2373+29G>A		c.2373+29G>A	intron_variant
692	55098670	rs1371405063	T	C	c.2373+27A>G		c.2373+27A>G	intron_variant
693	55098671	rs1408909970	G	A	c.2373+26C>T		c.2373+26C>T	intron_variant
694	55098672	rs1233295536	G	A	c.2373+25C>T		c.2373+25C>T	intron_variant
695	55098673	rs1412076256	G	T	c.2373+24C>A		c.2373+24C>A	intron_variant
696	55098676	rs552958308	G	A	c.2373+21C>T		c.2373+21C>T	intron_variant
697	55098680	rs1271743902	G	A	c.2373+17C>T		c.2373+17C>T	intron_variant
698	55098684		A	G	c.2373+13T>C		c.2373+13T>C	intron_variant
699	55098687	rs752555245	A	T	c.2373+10T>A		c.2373+10T>A	intron_variant
700	55098698	rs758102038	C	T	p.Arg791Gln	p.Arg791Gln	c.2372G>A	missense_variant
701	55098699	rs777472312	G	C	p.Arg791Gly	p.Arg791Gly	c.2371C>G	missense_variant
702	55098699	rs777472312	G	A	p.Arg791Trp	p.Arg791Trp	c.2371C>T	missense_variant
703	55098705	rs374386254	C	T	p.Val789Ile	p.Val789Ile	c.2365G>A	missense_variant
704	55098706	rs1193466702	G	A	p.Thr788Thr	p.Thr788Thr	c.2364C>T	synonymous_variant
705	55098707	rs1364615379	G	A	p.Thr788Ile	p.Thr788Ile	c.2363C>T	missense_variant
706	55098710	rs193921127	C	T	p.Arg787Gln	p.Arg787Gln	c.2360G>A	missense_variant
707	55098711	rs1139774	G	A	p.Arg787Trp	p.Arg787Trp	c.2359C>T	missense_variant
708	55098714	rs143360618	G	A	p.Leu786Leu	p.Leu786Leu	c.2356C>T	synonymous_variant
709	55098723	rs139553596	C	G	p.Val783Leu	p.Val783Leu	c.2347G>C	missense_variant
710	55098726	rs769138106	G	A	p.Leu782Phe	p.Leu782Phe	c.2344C>T	missense_variant
711	55098736	rs1350690120	G	A	p.Phe778Phe	p.Phe778Phe	c.2334C>T	synonymous_variant
712	55098738	rs774769718	A	G	p.Phe778Leu	p.Phe778Leu	c.2332T>C	missense_variant
713	55098739	rs762137124	G	A	p.Phe777Phe	p.Phe777Phe	c.2331C>T	synonymous_variant
714	55098744	rs767778903	T	G	p.Met776Leu	p.Met776Leu	c.2326A>C	missense_variant
715	55098744	rs767778903	T	C	p.Met776Val	p.Met776Val	c.2326A>G	missense_variant
716	55098745	rs201483998	G	T	p.Ala775Ala	p.Ala775Ala	c.2325C>A	synonymous_variant
717	55098754	rs370750952	C	T	p.Ala772Ala	p.Ala772Ala	c.2316G>A	synonymous_variant
718	55098754	rs370750952	C	A	p.Ala772Ala	p.Ala772Ala	c.2316G>T	synonymous_variant
719	55098755	rs199982402	G	A	p.Ala772Val	p.Ala772Val	c.2315C>T	missense_variant
720	55098756	rs1062832	C	T	p.Ala772Thr	p.Ala772Thr	c.2314G>A	missense_variant
721	55098757	rs376263503	C	T	p.Thr771Thr	p.Thr771Thr	c.2313G>A	synonymous_variant
722	55098757	rs376263503	C	A	p.Thr771Thr	p.Thr771Thr	c.2313G>T	synonymous_variant
723	55098758	rs149745504	G	A	p.Thr771Met	p.Thr771Met	c.2312C>T	missense_variant
724	55098764		A	C	p.Val769Gly	p.Val769Gly	c.2306T>G	missense_variant
725	55098766	rs144578288	T	C	p.Leu768Leu	p.Leu768Leu	c.2304A>G	synonymous_variant
726	55098770	rs1027071512	A	G	p.Ile767Thr	p.Ile767Thr	c.2300T>C	missense_variant
727	55098774	rs141493431	T	A	p.Ile766Phe	p.Ile766Phe	c.2296A>T	missense_variant
728	55098774	rs141493431	T	C	p.Ile766Val	p.Ile766Val	c.2296A>G	missense_variant
729	55098787	rs780676775	C	T	p.Thr761Thr	p.Thr761Thr	c.2283G>A	synonymous_variant
730	55098788	rs139500968	G	T	p.Thr761Lys	p.Thr761Lys	c.2282C>A	missense_variant
731	55098788	rs139500968	G	A	p.Thr761Met	p.Thr761Met	c.2282C>T	missense_variant
732	55098792		T	C	p.Lys760Glu	p.Lys760Glu	c.2278A>G	missense_variant
733	55098795		C	T	p.Glu759Lys	p.Glu759Lys	c.2275G>A	missense_variant
734	55098797		T	C	p.Gln758Arg	p.Gln758Arg	c.2273A>G	missense_variant
735	55098800	rs566194394	G	C	p.Ala757Gly	p.Ala757Gly	c.2270C>G	missense_variant
736	55098815	rs368377182	C	G	c.2267-12G>C		c.2267-12G>C	intron_variant
737	55098817	rs772442778	A	G	c.2267-14T>C		c.2267-14T>C	intron_variant
738	55098818	rs773280041	T	G	c.2267-15A>C		c.2267-15A>C	intron_variant
739	55098820	rs1232081575	G	A	c.2267-17C>T		c.2267-17C>T	intron_variant
740	55098830	rs776717664	C	G	c.2267-27G>C		c.2267-27G>C	intron_variant
741	55098832	rs528826057	A	G	c.2267-29T>C		c.2267-29T>C	intron_variant
742	55098834	rs1273355316	A	G	c.2267-31T>C		c.2267-31T>C	intron_variant
743	55098847	rs201228748	T	C	c.2267-44A>G		c.2267-44A>G	intron_variant
744	55098847	rs201228748	T	A	c.2267-44A>T		c.2267-44A>T	intron_variant
745	55098859	rs1365775386	G	GT	c.2267-57dup		c.2267-57dup	intron_variant
746	55098862	rs766826057	A	C	c.2267-59T>G		c.2267-59T>G	intron_variant
747	55098863	rs1432938922	G	A	c.2267-60C>T		c.2267-60C>T	intron_variant
748	55098864	rs201785245	AT	A	c.2267-62del		c.2267-62del	intron_variant
749	55098877	rs1560517244	G	A	c.2267-74C>T		c.2267-74C>T	intron_variant
750	55101824		G	A	c.2266+73C>T		c.2266+73C>T	intron_variant
751	55101837		T	G	c.2266+60A>C		c.2266+60A>C	intron_variant
752	55101841	rs142874477	C	G	c.2266+56G>C		c.2266+56G>C	intron_variant
753	55101841	rs142874477	C	T	c.2266+56G>A		c.2266+56G>A	intron_variant
754	55101842		G	C	c.2266+55C>G		c.2266+55C>G	intron_variant
755	55101842	rs1186382897	G	A	c.2266+55C>T		c.2266+55C>T	intron_variant
756	55101843	rs1447537484	G	A	c.2266+54C>T		c.2266+54C>T	intron_variant
757	55101844	rs369668784	C	G	c.2266+53G>C		c.2266+53G>C	intron_variant
758	55101845	rs1262829351	T	A	c.2266+52A>T		c.2266+52A>T	intron_variant
759	55101849	rs199866784	T	A	c.2266+48A>T		c.2266+48A>T	intron_variant
760	55101856	rs1308619010	C	A	c.2266+41G>T		c.2266+41G>T	intron_variant
761	55101874	rs778118239	A	G	c.2266+23T>C		c.2266+23T>C	intron_variant
762	55101876	rs746664609	AT	A	c.2266+20del		c.2266+20del	intron_variant
763	55101876	rs373433596	A	T	c.2266+21T>A		c.2266+21T>A	intron_variant
764	55101876	rs746664609	A	AT	c.2266+20dup		c.2266+20dup	intron_variant
765	55101886	rs7655964	A	C	c.2266+11T>G		c.2266+11T>G	intron_variant
766	55101886	rs7655964	A	G	c.2266+11T>C		c.2266+11T>C	intron_variant
767	55101904	rs372199336	T	C	p.Ile753Met	p.Ile753Met	c.2259A>G	missense_variant
768	55101905	rs774241378	A	G	p.Ile753Thr	p.Ile753Thr	c.2258T>C	missense_variant
769	55101916	rs146574274	C	A	p.Glu749Asp	p.Glu749Asp	c.2247G>T	missense_variant
770	55101919	rs766012290	C	T	p.Val748Val	p.Val748Val	c.2244G>A	synonymous_variant
771	55101920	rs753418486	A	C	p.Val748Gly	p.Val748Gly	c.2243T>G	missense_variant
772	55101946	rs1475547961	T	C	p.Ala739Ala	p.Ala739Ala	c.2217A>G	synonymous_variant
773	55101950	rs779599662	T	A	p.Gln738Leu	p.Gln738Leu	c.2213A>T	missense_variant
774	55101951	rs1412177179	G	T	p.Gln738Lys	p.Gln738Lys	c.2212C>A	missense_variant
775	55101958	rs147471059	G	A	p.Tyr735Tyr	p.Tyr735Tyr	c.2205C>T	synonymous_variant
776	55101964	rs562267427	G	A	p.Gly733Gly	p.Gly733Gly	c.2199C>T	synonymous_variant
777	55101970	rs138304068	G	A	p.Asp731Asp	p.Asp731Asp	c.2193C>T	synonymous_variant
778	55101973	rs1340178260	C	T	p.Glu730Glu	p.Glu730Glu	c.2190G>A	synonymous_variant
779	55101974		T	C	p.Glu730Gly	p.Glu730Gly	c.2189A>G	missense_variant
780	55101979	rs1227980262	C	T	p.Arg728Arg	p.Arg728Arg	c.2184G>A	synonymous_variant
781	55101989	rs189413564	C	A	p.Arg725Leu	p.Arg725Leu	c.2174G>T	missense_variant
782	55101991	rs745987131	G	A	p.Ile724Ile	p.Ile724Ile	c.2172C>T	synonymous_variant
783	55101993	rs537546608	T	C	p.Ile724Val	p.Ile724Val	c.2170A>G	missense_variant
784	55102004	rs375909858	C	T	p.Arg720Gln	p.Arg720Gln	c.2159G>A	missense_variant
785	55102005	rs1194087645	G	C	p.Arg720Gly	p.Arg720Gly	c.2158C>G	missense_variant
786	55102020	rs143798272	A	G	p.Leu715Leu	p.Leu715Leu	c.2143T>C	synonymous_variant
787	55102024	rs1172476783	A	G	p.Ile713Ile	p.Ile713Ile	c.2139T>C	synonymous_variant
788	55102038	rs768405608	GA	G	c.2135-11del		c.2135-11del	intron_variant
789	55102046	rs143264041	C	T	c.2135-18G>A		c.2135-18G>A	intron_variant
790	55102047	rs368864992	G	T	c.2135-19C>A		c.2135-19C>A	intron_variant
791	55102047	rs368864992	G	A	c.2135-19C>T		c.2135-19C>T	intron_variant
792	55102051	rs765993419	A	G	c.2135-23T>C		c.2135-23T>C	intron_variant
793	55102057	rs527635183	A	G	c.2135-29T>C		c.2135-29T>C	intron_variant
794	55102062	rs181420054	T	C	c.2135-34A>G		c.2135-34A>G	intron_variant
795	55102068	rs372141761	T	C	c.2135-40A>G		c.2135-40A>G	intron_variant
796	55102069	rs752190548	G	A	c.2135-41C>T		c.2135-41C>T	intron_variant
797	55102085	rs893723267	T	C	c.2135-57A>G		c.2135-57A>G	intron_variant
798	55102096	rs1366100165	T	G	c.2135-68A>C		c.2135-68A>C	intron_variant
799	55102287	rs1433370210	G	T	c.2134+75C>A		c.2134+75C>A	intron_variant
800	55102288	rs1157880544	A	G	c.2134+74T>C		c.2134+74T>C	intron_variant
801	55102296		T	A	c.2134+66A>T		c.2134+66A>T	intron_variant
802	55102306	rs905203251	G	T	c.2134+56C>A		c.2134+56C>A	intron_variant
803	55102306	rs905203251	G	C	c.2134+56C>G		c.2134+56C>G	intron_variant
804	55102310	rs1006270582	A	G	c.2134+52T>C		c.2134+52T>C	intron_variant
805	55102313	rs553704796	T	C	c.2134+49A>G		c.2134+49A>G	intron_variant
806	55102317	rs761871584	T	C	c.2134+45A>G		c.2134+45A>G	intron_variant
807	55102332	rs202125431	A	G	c.2134+30T>C		c.2134+30T>C	intron_variant
808	55102342	rs771923606	G	A	c.2134+20C>T		c.2134+20C>T	intron_variant
809	55102351	rs1355717217	A	G	c.2134+11T>C		c.2134+11T>C	intron_variant
810	55102358	rs373075572	T	C	c.2134+4A>G		c.2134+4A>G	splice_region_variant
811	55102364		G	A	p.Ser711Leu	p.Ser711Leu	c.2132C>T	missense_variant
812	55102374	rs746815762	C	G	p.Val708Leu	p.Val708Leu	c.2122G>C	missense_variant
813	55102375	rs374469178	A	G	p.Leu707Leu	p.Leu707Leu	c.2121T>C	synonymous_variant
814	55102378	rs1052130478	G	T	p.Thr706Thr	p.Thr706Thr	c.2118C>A	synonymous_variant
815	55102378		G	A	p.Thr706Thr	p.Thr706Thr	c.2118C>T	synonymous_variant
816	55102384	rs1290906332	A	G	p.Asn704Asn	p.Asn704Asn	c.2112T>C	synonymous_variant
817	55102400	rs762503710	A	G	p.Met699Thr	p.Met699Thr	c.2096T>C	missense_variant
818	55102414	rs750718982	G	A	p.Pro694Pro	p.Pro694Pro	c.2082C>T	synonymous_variant
819	55102417	rs756358189	A	T	p.Asn693Lys	p.Asn693Lys	c.2079T>A	missense_variant
820	55102418	rs780199440	T	G	p.Asn693Thr	p.Asn693Thr	c.2078A>C	missense_variant
821	55102423	rs545411969	A	G	p.Ser691Ser	p.Ser691Ser	c.2073T>C	synonymous_variant
822	55102428	rs199504669	C	A	p.Ala690Ser	p.Ala690Ser	c.2068G>T	missense_variant
823	55102428	rs199504669	C	T	p.Ala690Thr	p.Ala690Thr	c.2068G>A	missense_variant
824	55102429	rs370083230	C	T	p.Thr689Thr	p.Thr689Thr	c.2067G>A	synonymous_variant
825	55102430	rs34038364	G	A	p.Thr689Met	p.Thr689Met	c.2066C>T	missense_variant
826	55102435		T	C	p.Ser687Ser	p.Ser687Ser	c.2061A>G	synonymous_variant
827	55102443	rs374980446	C	T	p.Glu685Lys	p.Glu685Lys	c.2053G>A	missense_variant
828	55102444	rs769621134	G	A	p.Ile684Ile	p.Ile684Ile	c.2052C>T	synonymous_variant
829	55102452	rs775179342	C	T	p.Glu682Lys	p.Glu682Lys	c.2044G>A	missense_variant
830	55102454	rs762437152	C	A	p.Gly681Val	p.Gly681Val	c.2042G>T	missense_variant
831	55102456	rs768199296	A	C	p.Ile680Met	p.Ile680Met	c.2040T>G	missense_variant
832	55102460	rs1212783208	C	T	p.Ser679Asn	p.Ser679Asn	c.2036G>A	missense_variant
833	55102461	rs1225228256	T	C	p.Ser679Gly	p.Ser679Gly	c.2035A>G	missense_variant
834	55102465	rs368034364	C	T	p.Thr677Thr	p.Thr677Thr	c.2031G>A	synonymous_variant
835	55102466	rs200338299	G	A	p.Thr677Met	p.Thr677Met	c.2030C>T	missense_variant
836	55102474	rs139644107	C	G	p.Glu674Asp	p.Glu674Asp	c.2022G>C	missense_variant
837	55102479		G	A	p.Leu673Leu	p.Leu673Leu	c.2017C>T	synonymous_variant
838	55102484	rs149740758	C	T	p.Gly671Glu	p.Gly671Glu	c.2012G>A	missense_variant
839	55102492	rs371966849	C	T	p.Thr668Thr	p.Thr668Thr	c.2004G>A	synonymous_variant
840	55102493	rs199774865	G	C	p.Thr668Arg	p.Thr668Arg	c.2003C>G	missense_variant
841	55102493	rs199774865	G	A	p.Thr668Met	p.Thr668Met	c.2003C>T	missense_variant
842	55102505	rs540277686	C	T	p.Arg664His	p.Arg664His	c.1991G>A	missense_variant
843	55102506	rs755067067	G	A	p.Arg664Cys	p.Arg664Cys	c.1990C>T	missense_variant
844	55102512	rs752683688	G	C	c.1988-4C>G		c.1988-4C>G	splice_region_variant
845	55102538	rs368221033	A	G	c.1988-30T>C		c.1988-30T>C	intron_variant
846	55102549	rs1447988545	A	T	c.1988-41T>A		c.1988-41T>A	intron_variant
847	55102561	rs976388997	G	C	c.1988-53C>G		c.1988-53C>G	intron_variant
848	55102578	rs13135562	C	G	c.1988-70G>C		c.1988-70G>C	intron_variant
849	55104568		G	T	c.1987+75C>A		c.1987+75C>A	intron_variant
850	55104569		C	T	c.1987+74G>A		c.1987+74G>A	intron_variant
851	55104572	rs1375602352	A	G	c.1987+71T>C		c.1987+71T>C	intron_variant
852	55104574	rs761262721	C	T	c.1987+69G>A		c.1987+69G>A	intron_variant
853	55104582	rs773675449	T	C	c.1987+61A>G		c.1987+61A>G	intron_variant
854	55104583	rs1331850470	T	A	c.1987+60A>T		c.1987+60A>T	intron_variant
855	55104586	rs533316977	A	T	c.1987+57T>A		c.1987+57T>A	intron_variant
856	55104591		A	C	c.1987+52T>G		c.1987+52T>G	intron_variant
857	55104610	rs372798549	C	T	c.1987+33G>A		c.1987+33G>A	intron_variant
858	55104615	rs17085310	G	A	c.1987+28C>T		c.1987+28C>T	intron_variant
859	55104616		C	A	c.1987+27G>T		c.1987+27G>T	intron_variant
860	55104617	rs201852355	A	T	c.1987+26T>A		c.1987+26T>A	intron_variant
861	55104621	rs1238051765	T	C	c.1987+22A>G		c.1987+22A>G	intron_variant
862	55104624	rs1399910835	T	C	c.1987+19A>G		c.1987+19A>G	intron_variant
863	55104625	rs750374928	C	T	c.1987+18G>A		c.1987+18G>A	intron_variant
864	55104625	rs750374928	C	G	c.1987+18G>C		c.1987+18G>C	intron_variant
865	55104628		G	T	c.1987+15C>A		c.1987+15C>A	intron_variant
866	55104636	rs756059341	T	A	c.1987+7A>T		c.1987+7A>T	splice_region_variant
867	55104639	rs1216887172	C	T	c.1987+4G>A		c.1987+4G>A	splice_region_variant
868	55104645	rs1214707836	A	G	p.Leu662Pro	p.Leu662Pro	c.1985T>C	missense_variant
869	55104646	rs779902862	G	C	p.Leu662Val	p.Leu662Val	c.1984C>G	missense_variant
870	55104647	rs144568354	G	T	p.Val661Val	p.Val661Val	c.1983C>A	synonymous_variant
871	55104652	rs1275390008	T	C	p.Thr660Ala	p.Thr660Ala	c.1978A>G	missense_variant
872	55104653	rs768377010	G	A	p.Leu659Leu	p.Leu659Leu	c.1977C>T	synonymous_variant
873	55104661		T	A	p.Arg657Trp	p.Arg657Trp	c.1969A>T	missense_variant
874	55104661		T	C	p.Arg657Gly	p.Arg657Gly	c.1969A>G	missense_variant
875	55104664	rs1245496127	C	T	p.Val656Ile	p.Val656Ile	c.1966G>A	missense_variant
876	55104665	rs1578134591	C	A	p.Val655Val	p.Val655Val	c.1965G>T	synonymous_variant
877	55104667	rs747693621	C	T	p.Val655Met	p.Val655Met	c.1963G>A	missense_variant
878	55104678	rs1353678100	T	C	p.Lys651Arg	p.Lys651Arg	c.1952A>G	missense_variant
879	55104684		G	A	p.Thr649Ile	p.Thr649Ile	c.1946C>T	missense_variant
880	55104686	rs142392193	C	T	p.Lys648Lys	p.Lys648Lys	c.1944G>A	synonymous_variant
881	55104691	rs747524669	T	C	p.Arg647Gly	p.Arg647Gly	c.1939A>G	missense_variant
882	55104692	rs1347237662	G	C	p.Asp646Glu	p.Asp646Glu	c.1938C>G	missense_variant
883	55104697	rs774211387	G	C	p.Gln645Glu	p.Gln645Glu	c.1933C>G	missense_variant
884	55104700	rs759802154	C	T	p.Ala644Thr	p.Ala644Thr	c.1930G>A	missense_variant
885	55104725		C	A	p.Gln635His	p.Gln635His	c.1905G>T	missense_variant
886	55104734		T	C	p.Ala632Ala	p.Ala632Ala	c.1896A>G	synonymous_variant
887	55104736	rs548682808	C	G	p.Ala632Pro	p.Ala632Pro	c.1894G>C	missense_variant
888	55104743		A	G	p.Leu629Leu	p.Leu629Leu	c.1887T>C	synonymous_variant
889	55104745	rs1337809327	G	A	p.Leu629Phe	p.Leu629Phe	c.1885C>T	missense_variant
890	55104754	rs376258268	T	C	p.Ile626Val	p.Ile626Val	c.1876A>G	missense_variant
891	55104755	rs764284784	C	G	p.Leu625Phe	p.Leu625Phe	c.1875G>C	missense_variant
892	55104764	rs745583761	A	G	p.Asn622Asn	p.Asn622Asn	c.1866T>C	synonymous_variant
893	55104770	rs756106012	G	C	p.Ser620Arg	p.Ser620Arg	c.1860C>G	missense_variant
894	55104773	rs1276822881	A	G	p.Asn619Asn	p.Asn619Asn	c.1857T>C	synonymous_variant
895	55104780	rs1449267006	A	G	p.Phe617Ser	p.Phe617Ser	c.1850T>C	missense_variant
896	55104791	rs778690484	A	G	p.Asn613Asn	p.Asn613Asn	c.1839T>C	synonymous_variant
897	55104796	rs77722107	A	G	p.Leu612Leu	p.Leu612Leu	c.1834T>C	synonymous_variant
898	55104805	rs1400764978	G	C	p.Leu609Val	p.Leu609Val	c.1825C>G	missense_variant
899	55104811	rs777299134	C	G	p.Asp607His	p.Asp607His	c.1819G>C	missense_variant
900	55104815	rs1401174414	G	A	p.Asn605Asn	p.Asn605Asn	c.1815C>T	synonymous_variant
901	55104824	rs146444498	A	T	p.Val602Val	p.Val602Val	c.1806T>A	synonymous_variant
902	55104834	rs1339571252	G	C	p.Pro599Arg	p.Pro599Arg	c.1796C>G	missense_variant
903	55104836		C	G	p.Leu598Phe	p.Leu598Phe	c.1794G>C	missense_variant
904	55104843	rs1282839301	C	T	p.Gly596Glu	p.Gly596Glu	c.1787G>A	missense_variant
905	55104850	rs369310569	G	C	p.His594Asp	p.His594Asp	c.1780C>G	missense_variant
906	55104851	rs746311924	G	C	p.Ile593Met	p.Ile593Met	c.1779C>G	missense_variant
907	55104853	rs146888336	T	A	p.Ile593Phe	p.Ile593Phe	c.1777A>T	missense_variant
908	55104859	rs775941282	G	A	p.Leu591Leu	p.Leu591Leu	c.1771C>T	synonymous_variant
909	55104862	rs140825421	G	A	p.Pro590Ser	p.Pro590Ser	c.1768C>T	missense_variant
910	55104884	rs561326865	T	A	p.Thr582Thr	p.Thr582Thr	c.1746A>T	synonymous_variant
911	55104890	rs1185605428	G	A	p.Asn580Asn	p.Asn580Asn	c.1740C>T	synonymous_variant
912	55104896	rs1488566148	A	C	p.Phe578Leu	p.Phe578Leu	c.1734T>G	missense_variant
913	55104899	rs373281206	C	T	p.Thr577Thr	p.Thr577Thr	c.1731G>A	synonymous_variant
914	55104908	rs765027433	G	A	p.Asp574Asp	p.Asp574Asp	c.1722C>T	synonymous_variant
915	55104923	rs752419161	C	A	p.Leu569Phe	p.Leu569Phe	c.1707G>T	missense_variant
916	55104931	rs201069157	C	T	p.Val567Met	p.Val567Met	c.1699G>A	missense_variant
917	55104932	rs777384738	G	A	p.Ser566Ser	p.Ser566Ser	c.1698C>T	synonymous_variant
918	55104933	rs756721127	C	T	p.Ser566Asn	p.Ser566Asn	c.1697G>A	missense_variant
919	55104941	rs1317027204	C	A	p.Glu563Asp	p.Glu563Asp	c.1689G>T	missense_variant
920	55104945	rs1309169009	G	T	p.Thr562Asn	p.Thr562Asn	c.1685C>A	missense_variant
921	55104954	rs571373045	A	C	p.Met559Arg	p.Met559Arg	c.1676T>G	missense_variant
922	55104955	rs1256613686	T	A	p.Met559Leu	p.Met559Leu	c.1675A>T	missense_variant
923	55104956	rs749620473	G	T	p.Asp558Glu	p.Asp558Glu	c.1674C>A	missense_variant
924	55104962	rs1385893395	T	C	p.Gln556Gln	p.Gln556Gln	c.1668A>G	synonymous_variant
925	55104964		G	A	p.Gln556Ter	p.Gln556Ter	c.1666C>T	stop_gained
926	55104968	rs1252948639	A	C	p.Thr554Thr	p.Thr554Thr	c.1662T>G	synonymous_variant
927	55104971		A	C	p.Ile553Met	p.Ile553Met	c.1659T>G	missense_variant
928	55104982	rs772028072	C	A	p.Gly550Cys	p.Gly550Cys	c.1648G>T	missense_variant
929	55105001	rs759394085	A	G	c.1646-17T>C		c.1646-17T>C	intron_variant
930	55105002	rs765117072	T	C	c.1646-18A>G		c.1646-18A>G	intron_variant
931	55105017	rs369736837	G	T	c.1646-33C>A		c.1646-33C>A	intron_variant
932	55105020	rs1231846149	T	G	c.1646-36A>C		c.1646-36A>C	intron_variant
933	55105028	rs1302595722	G	C	c.1646-44C>G		c.1646-44C>G	intron_variant
934	55105043		A	T	c.1646-59T>A		c.1646-59T>A	intron_variant
935	55105044	rs1393428858	T	C	c.1646-60A>G		c.1646-60A>G	intron_variant
936	55105048	rs930307655	G	T	c.1646-64C>A		c.1646-64C>A	intron_variant
937	55105057	rs370500507	A	G	c.1646-73T>C		c.1646-73T>C	intron_variant
938	55105058		G	A	c.1646-74C>T		c.1646-74C>T	intron_variant
939	55105058	rs907615353	G	C	c.1646-74C>G		c.1646-74C>G	intron_variant
940	55105761	rs951939781	A	G	c.1645+71T>C		c.1645+71T>C	intron_variant
941	55105765	rs1004769070	G	A	c.1645+67C>T		c.1645+67C>T	intron_variant
942	55105773	rs1313497677	A	ATAGCT	c.1645+54_1645+58dup		c.1645+54_1645+58dup	intron_variant
943	55105774	rs1055714827	T	C	c.1645+58A>G		c.1645+58A>G	intron_variant
944	55105777		C	T	c.1645+55G>A		c.1645+55G>A	intron_variant
945	55105780	rs895179965	A	G	c.1645+52T>C		c.1645+52T>C	intron_variant
946	55105785	rs1273252317	C	T	c.1645+47G>A		c.1645+47G>A	intron_variant
947	55105789	rs780682007	T	C	c.1645+43A>G		c.1645+43A>G	intron_variant
948	55105791	rs749710493	T	C	c.1645+41A>G		c.1645+41A>G	intron_variant
949	55105794	rs369491842	G	A	c.1645+38C>T		c.1645+38C>T	intron_variant
950	55105798	rs1469674772	G	C	c.1645+34C>G		c.1645+34C>G	intron_variant
951	55105798		G	T	c.1645+34C>A		c.1645+34C>A	intron_variant
952	55105799	rs373530122	A	G	c.1645+33T>C		c.1645+33T>C	intron_variant
953	55105805	rs748328225	C	T	c.1645+27G>A		c.1645+27G>A	intron_variant
954	55105817	rs760790012	G	A	c.1645+15C>T		c.1645+15C>T	intron_variant
955	55105819	rs769766624	G	A	c.1645+13C>T		c.1645+13C>T	intron_variant
956	55105824	rs762797581	G	C	c.1645+8C>G		c.1645+8C>G	splice_region_variant
957	55105826	rs1215999843	A	T	c.1645+6T>A		c.1645+6T>A	splice_region_variant
958	55105835	rs751302343	T	C	p.Thr548Ala	p.Thr548Ala	c.1642A>G	missense_variant
959	55105838	rs761405036	C	T	p.Val547Met	p.Val547Met	c.1639G>A	missense_variant
960	55105839	rs141120216	G	A	p.His546His	p.His546His	c.1638C>T	synonymous_variant
961	55105840	rs376432106	T	G	p.His546Pro	p.His546Pro	c.1637A>C	missense_variant
962	55105848	rs150270342	G	A	p.Ile543Ile	p.Ile543Ile	c.1629C>T	synonymous_variant
963	55105853	rs563652934	C	A	p.Val542Leu	p.Val542Leu	c.1624G>T	missense_variant
964	55105854		C	T	p.Arg541Arg	p.Arg541Arg	c.1623G>A	synonymous_variant
965	55105861	rs1487493814	C	T	p.Gly539Glu	p.Gly539Glu	c.1616G>A	missense_variant
966	55105862		C	A	p.Gly539Ter	p.Gly539Ter	c.1615G>T	stop_gained
967	55105862	rs55716939	C	T	p.Gly539Arg	p.Gly539Arg	c.1615G>A	missense_variant
968	55105869	rs747128649	G	T	p.Val536Val	p.Val536Val	c.1608C>A	synonymous_variant
969	55105875	rs558204656	G	A	p.Asn534Asn	p.Asn534Asn	c.1602C>T	synonymous_variant
970	55105881	rs138803814	C	T	p.Ala532Ala	p.Ala532Ala	c.1596G>A	synonymous_variant
971	55105882	rs147066083	G	A	p.Ala532Val	p.Ala532Val	c.1595C>T	missense_variant
972	55105894	rs1456500122	T	C	p.Tyr528Cys	p.Tyr528Cys	c.1583A>G	missense_variant
973	55105902	rs138366069	T	C	p.Ser525Ser	p.Ser525Ser	c.1575A>G	synonymous_variant
974	55105914	rs200769864	C	T	p.Ala521Ala	p.Ala521Ala	c.1563G>A	synonymous_variant
975	55105915	rs772912254	G	A	p.Ala521Val	p.Ala521Val	c.1562C>T	missense_variant
976	55105924	rs760319455	A	T	p.Val518Asp	p.Val518Asp	c.1553T>A	missense_variant
977	55105933	rs1239988448	C	T	p.Ser515Asn	p.Ser515Asn	c.1544G>A	missense_variant
978	55105935		T	C	p.Val514Val	p.Val514Val	c.1542A>G	synonymous_variant
979	55105940	rs773352148	T	C	p.Thr513Ala	p.Thr513Ala	c.1537A>G	missense_variant
980	55105946	rs192072878	C	T	c.1537-6G>A		c.1537-6G>A	splice_region_variant
981	55105946	rs1464705492	CG	C	c.1537-7del		c.1537-7del	splice_region_variant
982	55105947	rs149305690	G	A	c.1537-7C>T		c.1537-7C>T	splice_region_variant
983	55105950	rs869308937	GA	G	c.1537-11del		c.1537-11del	intron_variant
984	55105954	rs753045529	A	G	c.1537-14T>C		c.1537-14T>C	intron_variant
985	55105956	rs777918865	A	G	c.1537-16T>C		c.1537-16T>C	intron_variant
986	55105956	rs777918865	A	T	c.1537-16T>A		c.1537-16T>A	intron_variant
987	55105959	rs1048851482	A	T	c.1537-19T>A		c.1537-19T>A	intron_variant
988	55105968	rs1364427995	C	T	c.1537-28G>A		c.1537-28G>A	intron_variant
989	55105969	rs747250042	C	T	c.1537-29G>A		c.1537-29G>A	intron_variant
990	55105974	rs1384802105	A	C	c.1537-34T>G		c.1537-34T>G	intron_variant
991	55105978	rs370272716	C	T	c.1537-38G>A		c.1537-38G>A	intron_variant
992	55105979	rs768526702	G	A	c.1537-39C>T		c.1537-39C>T	intron_variant
993	55105980	rs373716728	C	T	c.1537-40G>A		c.1537-40G>A	intron_variant
994	55105981	rs1302490586	G	A	c.1537-41C>T		c.1537-41C>T	intron_variant
995	55105982		G	A	c.1537-42C>T		c.1537-42C>T	intron_variant
996	55105988	rs915807549	T	C	c.1537-48A>G		c.1537-48A>G	intron_variant
997	55105989	rs1288010070	G	C	c.1537-49C>G		c.1537-49C>G	intron_variant
998	55106004		GTC	G	c.1537-66_1537-65del		c.1537-66_1537-65del	intron_variant
999	55106007		CA	C	c.1537-68del		c.1537-68del	intron_variant
1000	55106009	rs1416998827	G	C	c.1537-69C>G		c.1537-69C>G	intron_variant
1001	55106614	rs778962400	T	C	c.1536+73A>G		c.1536+73A>G	intron_variant
1002	55106614	rs778962400	T	G	c.1536+73A>C		c.1536+73A>C	intron_variant
1003	55106622	rs892806041	A	G	c.1536+65T>C		c.1536+65T>C	intron_variant
1004	55106628		T	C	c.1536+59A>G		c.1536+59A>G	intron_variant
1005	55106630	rs889063329	G	A	c.1536+57C>T		c.1536+57C>T	intron_variant
1006	55106635		A	C	c.1536+52T>G		c.1536+52T>G	intron_variant
1007	55106635	rs781416324	A	T	c.1536+52T>A		c.1536+52T>A	intron_variant
1008	55106647	rs771411932	A	AAG	c.1536+38_1536+39dup		c.1536+38_1536+39dup	intron_variant
1009	55106647	rs771411932	AAG	A	c.1536+38_1536+39del		c.1536+38_1536+39del	intron_variant
1010	55106647	rs771411932	AAGAG	A	c.1536+36_1536+39del		c.1536+36_1536+39del	intron_variant
1011	55106649	rs1341080934	G	C	c.1536+38C>G		c.1536+38C>G	intron_variant
1012	55106659	rs376861514	T	C	c.1536+28A>G		c.1536+28A>G	intron_variant
1013	55106666	rs1235558182	A	T	c.1536+21T>A		c.1536+21T>A	intron_variant
1014	55106668	rs1022701610	T	C	c.1536+19A>G		c.1536+19A>G	intron_variant
1015	55106672	rs1281778450	A	G	c.1536+15T>C		c.1536+15T>C	intron_variant
1016	55106680	rs1273589908	A	G	c.1536+7T>C		c.1536+7T>C	splice_region_variant
1017	55106692	rs772824384	T	C	p.Asn511Asp	p.Asn511Asp	c.1531A>G	missense_variant
1018	55106703	rs760403550	A	T	p.Ile507Asn	p.Ile507Asn	c.1520T>A	missense_variant
1019	55106716		G	T	p.Gln503Lys	p.Gln503Lys	c.1507C>A	missense_variant
1020	55106730	rs587778424	T	A	p.Glu498Val	p.Glu498Val	c.1493A>T	missense_variant
1021	55106733	rs765732771	A	G	p.Ile497Thr	p.Ile497Thr	c.1490T>C	missense_variant
1022	55106741	rs971235567	T	G	p.Gly494Gly	p.Gly494Gly	c.1482A>C	synonymous_variant
1023	55106752	rs143901615	A	G	p.Phe491Leu	p.Phe491Leu	c.1471T>C	missense_variant
1024	55106753	rs1171958274	G	C	p.Asp490Glu	p.Asp490Glu	c.1470C>G	missense_variant
1025	55106763	rs1179439779	C	T	p.Ser487Asn	p.Ser487Asn	c.1460G>A	missense_variant
1026	55106774		T	C	p.Glu483Glu	p.Glu483Glu	c.1449A>G	synonymous_variant
1027	55106779	rs34231037	A	G	p.Cys482Arg	p.Cys482Arg	c.1444T>C	missense_variant
1028	55106783	rs372308336	G	A	p.Tyr480Tyr	p.Tyr480Tyr	c.1440C>T	synonymous_variant
1029	55106785	rs750539689	A	G	p.Tyr480His	p.Tyr480His	c.1438T>C	missense_variant
1030	55106801	rs1200885995	G	A	p.Val474Val	p.Val474Val	c.1422C>T	synonymous_variant
1031	55106803	rs778773606	C	G	p.Val474Leu	p.Val474Leu	c.1420G>C	missense_variant
1032	55106807	rs1870377	T	A	p.Gln472His	p.Gln472His	c.1416A>T	missense_variant
1033	55106814		T	C	c.1413-4A>G		c.1413-4A>G	splice_region_variant
1034	55106829	rs141148696	A	C	c.1413-19T>G		c.1413-19T>G	intron_variant
1035	55106831	rs368501168	C	T	c.1413-21G>A		c.1413-21G>A	intron_variant
1036	55106832	rs192217039	G	A	c.1413-22C>T		c.1413-22C>T	intron_variant
1037	55106832	rs774034637	GC	G	c.1413-23del		c.1413-23del	intron_variant
1038	55106833	rs774799927	C	T	c.1413-23G>A		c.1413-23G>A	intron_variant
1039	55106836	rs763547535	A	G	c.1413-26T>C		c.1413-26T>C	intron_variant
1040	55106840	rs1040911275	T	C	c.1413-30A>G		c.1413-30A>G	intron_variant
1041	55106843	rs1435088415	T	C	c.1413-33A>G		c.1413-33A>G	intron_variant
1042	55106847	rs1272620182	AT	A	c.1413-38del		c.1413-38del	intron_variant
1043	55106859		T	C	c.1413-49A>G		c.1413-49A>G	intron_variant
1044	55106862	rs1188061202	G	C	c.1413-52C>G		c.1413-52C>G	intron_variant
1045	55106863	rs552018815	A	G	c.1413-53T>C		c.1413-53T>C	intron_variant
1046	55106866	rs1401043967	C	A	c.1413-56G>T		c.1413-56G>T	intron_variant
1047	55106871	rs1232239473	G	C	c.1413-61C>G		c.1413-61C>G	intron_variant
1048	55106874	rs568821012	A	C	c.1413-64T>G		c.1413-64T>G	intron_variant
1049	55106883	rs537403549	T	C	c.1413-73A>G		c.1413-73A>G	intron_variant
1050	55107672	rs1044544364	T	C	c.1412+65A>G		c.1412+65A>G	intron_variant
1051	55107673	rs888229031	A	G	c.1412+64T>C		c.1412+64T>C	intron_variant
1052	55107682	rs149151577	C	T	c.1412+55G>A		c.1412+55G>A	intron_variant
1053	55107714	rs1416986120	A	T	c.1412+23T>A		c.1412+23T>A	intron_variant
1054	55107734	rs371810978	C	T	c.1412+3G>A		c.1412+3G>A	splice_region_variant
1055	55107738		T	G	p.Ser471Arg	p.Ser471Arg	c.1411A>C	missense_variant
1056	55107743	rs1371472759	T	C	p.Glu469Gly	p.Glu469Gly	c.1406A>G	missense_variant
1057	55107745	rs141384787	G	C	p.Asn468Lys	p.Asn468Lys	c.1404C>G	missense_variant
1058	55107745	rs141384787	G	T	p.Asn468Lys	p.Asn468Lys	c.1404C>A	missense_variant
1059	55107745	rs141384787	G	A	p.Asn468Asn	p.Asn468Asn	c.1404C>T	synonymous_variant
1060	55107746	rs997496217	T	C	p.Asn468Ser	p.Asn468Ser	c.1403A>G	missense_variant
1061	55107749	rs1414415639	G	T	p.Ala467Asp	p.Ala467Asp	c.1400C>A	missense_variant
1062	55107751	rs150787984	G	A	p.Cys466Cys	p.Cys466Cys	c.1398C>T	synonymous_variant
1063	55107759	rs746838678	C	T	p.Glu464Lys	p.Glu464Lys	c.1390G>A	missense_variant
1064	55107765	rs56286620	A	C	p.Leu462Val	p.Leu462Val	c.1384T>G	missense_variant
1065	55107770	rs1409191099	C	A	p.Trp460Leu	p.Trp460Leu	c.1379G>T	missense_variant
1066	55107781	rs769291144	G	A	p.Ile456Ile	p.Ile456Ile	c.1368C>T	synonymous_variant
1067	55107787	rs139156665	A	T	p.His454Gln	p.His454Gln	c.1362T>A	missense_variant
1068	55107790	rs762349152	C	T	p.Pro453Pro	p.Pro453Pro	c.1359G>A	synonymous_variant
1069	55107791	rs769193899	G	A	p.Pro453Leu	p.Pro453Leu	c.1358C>T	missense_variant
1070	55107796		A	T	p.Pro451Pro	p.Pro451Pro	c.1353T>A	synonymous_variant
1071	55107808	rs774833348	G	C	p.Val447Val	p.Val447Val	c.1341C>G	synonymous_variant
1072	55107811	rs139324427	C	T	p.Thr446Thr	p.Thr446Thr	c.1338G>A	synonymous_variant
1073	55107812	rs762221907	G	A	p.Thr446Met	p.Thr446Met	c.1337C>T	missense_variant
1074	55107823	rs41279537	C	T	p.Thr442Thr	p.Thr442Thr	c.1326G>A	synonymous_variant
1075	55107824	rs766459956	G	A	p.Thr442Met	p.Thr442Met	c.1325C>T	missense_variant
1076	55107833	rs753996341	G	A	p.Thr439Ile	p.Thr439Ile	c.1316C>T	missense_variant
1077	55107835		G	A	p.Gly438Gly	p.Gly438Gly	c.1314C>T	synonymous_variant
1078	55107837	rs754979123	C	T	p.Gly438Ser	p.Gly438Ser	c.1312G>A	missense_variant
1079	55107837	rs754979123	C	G	p.Gly438Arg	p.Gly438Arg	c.1312G>C	missense_variant
1080	55107838	rs139884656	G	A	p.Tyr437Tyr	p.Tyr437Tyr	c.1311C>T	synonymous_variant
1081	55107862		G	T	p.Ile429Ile	p.Ile429Ile	c.1287C>A	synonymous_variant
1082	55107863	rs757198176	A	G	p.Ile429Thr	p.Ile429Thr	c.1286T>C	missense_variant
1083	55107865	rs143260608	T	C	p.Leu428Leu	p.Leu428Leu	c.1284A>G	synonymous_variant
1084	55107896	rs375076833	G	A	c.1256-3C>T		c.1256-3C>T	splice_region_variant
1085	55107899		G	A	c.1256-6C>T		c.1256-6C>T	splice_region_variant
1086	55107902	rs748897632	G	A	c.1256-9C>T		c.1256-9C>T	intron_variant
1087	55107903	rs192508718	G	A	c.1256-10C>T		c.1256-10C>T	intron_variant
1088	55107913	rs1467142705	C	A	c.1256-20G>T		c.1256-20G>T	intron_variant
1089	55107923	rs767522348	G	GT	c.1256-31dup		c.1256-31dup	intron_variant
1090	55107925	rs538182552	C	T	c.1256-32G>A		c.1256-32G>A	intron_variant
1091	55107927		G	T	c.1256-34C>A		c.1256-34C>A	intron_variant
1092	55107928	rs112865999	T	C	c.1256-35A>G		c.1256-35A>G	intron_variant
1093	55107935	rs1486448574	T	G	c.1256-42A>C		c.1256-42A>C	intron_variant
1094	55107963		A	G	c.1256-70T>C		c.1256-70T>C	intron_variant
1095	55107965	rs1211342220	C	T	c.1256-72G>A		c.1256-72G>A	intron_variant
1096	55110329	rs955447900	C	T	c.1255+74G>A		c.1255+74G>A	intron_variant
1097	55110330	rs576351345	G	A	c.1255+73C>T		c.1255+73C>T	intron_variant
1098	55110344	rs966848045	T	C	c.1255+59A>G		c.1255+59A>G	intron_variant
1099	55110347	rs1019408374	G	A	c.1255+56C>T		c.1255+56C>T	intron_variant
1100	55110356	rs760922069	T	C	c.1255+47A>G		c.1255+47A>G	intron_variant
1101	55110363	rs979697806	T	C	c.1255+40A>G		c.1255+40A>G	intron_variant
1102	55110366	rs1421593830	T	G	c.1255+37A>C		c.1255+37A>C	intron_variant
1103	55110376	rs1195192511	G	A	c.1255+27C>T		c.1255+27C>T	intron_variant
1104	55110379	rs192844181	G	A	c.1255+24C>T		c.1255+24C>T	intron_variant
1105	55110380	rs1301100498	A	T	c.1255+23T>A		c.1255+23T>A	intron_variant
1106	55110389	rs1197867122	T	C	c.1255+14A>G		c.1255+14A>G	intron_variant
1107	55110391	rs199919978	G	T	c.1255+12C>A		c.1255+12C>A	intron_variant
1108	55110396	rs750275388	G	C	c.1255+7C>G		c.1255+7C>G	splice_region_variant
1109	55110400	rs755859970	C	T	c.1255+3G>A		c.1255+3G>A	splice_region_variant
1110	55110405	rs779812906	T	G	p.Tyr418Ser	p.Tyr418Ser	c.1253A>C	missense_variant
1111	55110405	rs779812906	T	A	p.Tyr418Phe	p.Tyr418Phe	c.1253A>T	missense_variant
1112	55110410	rs41404149	A	G	p.Val416Val	p.Val416Val	c.1248T>C	synonymous_variant
1113	55110411	rs751603128	A	G	p.Val416Ala	p.Val416Ala	c.1247T>C	missense_variant
1114	55110413	rs1159639446	CAG	C	p.Leu415GlyfsTer10	p.Leu415GlyfsTer10	c.1243_1244del	frameshift_variant
1115	55110413	rs778421767	C	T	p.Leu415Leu	p.Leu415Leu	c.1245G>A	synonymous_variant
1116	55110420		A	G	p.Val413Ala	p.Val413Ala	c.1238T>C	missense_variant
1117	55110428	rs561800569	G	T	p.Ser410Arg	p.Ser410Arg	c.1230C>A	missense_variant
1118	55110440		C	T	p.Lys406Lys	p.Lys406Lys	c.1218G>A	synonymous_variant
1119	55110450	rs759869837	G	A	p.Pro403Leu	p.Pro403Leu	c.1208C>T	missense_variant
1120	55110456	rs770093244	G	A	p.Thr401Ile	p.Thr401Ile	c.1202C>T	missense_variant
1121	55110466	rs587778430	C	T	p.Val398Ile	p.Val398Ile	c.1192G>A	missense_variant
1122	55110490	rs753625353	C	T	p.Glu390Lys	p.Glu390Lys	c.1168G>A	missense_variant
1123	55110496		C	A	p.Val388Leu	p.Val388Leu	c.1162G>T	missense_variant
1124	55110502	rs754642542	T	C	p.Met386Val	p.Met386Val	c.1156A>G	missense_variant
1125	55110506	rs200767530	C	T	p.Thr384Thr	p.Thr384Thr	c.1152G>A	synonymous_variant
1126	55110507	rs201708587	G	A	p.Thr384Met	p.Thr384Met	c.1151C>T	missense_variant
1127	55110518	rs1399139149	C	G	p.Gly380Gly	p.Gly380Gly	c.1140G>C	synonymous_variant
1128	55110521	rs201755957	C	T	p.Ala379Ala	p.Ala379Ala	c.1137G>A	synonymous_variant
1129	55110522	rs747477930	G	A	p.Ala379Val	p.Ala379Val	c.1136C>T	missense_variant
1130	55110542	rs113121239	C	G	p.Glu372Asp	p.Glu372Asp	c.1116G>C	missense_variant
1131	55110542	rs113121239	C	T	p.Glu372Glu	p.Glu372Glu	c.1116G>A	synonymous_variant
1132	55110547	rs770185306	G	C	p.Leu371Val	p.Leu371Val	c.1111C>G	missense_variant
1133	55110550	rs1295853705	G	A	p.Pro370Ser	p.Pro370Ser	c.1108C>T	missense_variant
1134	55110550		G	T	p.Pro370Thr	p.Pro370Thr	c.1108C>A	missense_variant
1135	55110551		T	A	p.Ile369Ile	p.Ile369Ile	c.1107A>T	synonymous_variant
1136	55110570	rs768629027	T	A	c.1092-4A>T		c.1092-4A>T	splice_region_variant
1137	55110571	rs760647024	GA	G	c.1092-6del		c.1092-6del	splice_region_variant
1138	55110571	rs760647024	G	GA	c.1092-6dup		c.1092-6dup	splice_region_variant
1139	55110572	rs200041532	A	G	c.1092-6T>C		c.1092-6T>C	splice_region_variant
1140	55110578	rs371082712	A	C	c.1092-12T>G		c.1092-12T>G	intron_variant
1141	55110610		G	T	c.1091+44C>A		c.1091+44C>A	intron_variant
1142	55110617	rs752331056	C	T	c.1091+37G>A		c.1091+37G>A	intron_variant
1143	55110617	rs752331056	C	A	c.1091+37G>T		c.1091+37G>T	intron_variant
1144	55110619	rs369457740	C	T	c.1091+35G>A		c.1091+35G>A	intron_variant
1145	55110620	rs751032533	G	T	c.1091+34C>A		c.1091+34C>A	intron_variant
1146	55110620	rs751032533	G	A	c.1091+34C>T		c.1091+34C>T	intron_variant
1147	55110630	rs185338922	T	A	c.1091+24A>T		c.1091+24A>T	intron_variant
1148	55110633		G	T	c.1091+21C>A		c.1091+21C>A	intron_variant
1149	55110649	rs746305227	G	C	c.1091+5C>G		c.1091+5C>G	splice_region_variant
1150	55110649	rs746305227	G	T	c.1091+5C>A		c.1091+5C>A	splice_region_variant
1151	55110663	rs148390587	T	C	p.Glu361Gly	p.Glu361Gly	c.1082A>G	missense_variant
1152	55110681	rs770813941	A	C	p.Leu355Arg	p.Leu355Arg	c.1064T>G	missense_variant
1153	55110686	rs375682955	C	T	p.Lys353Lys	p.Lys353Lys	c.1059G>A	synonymous_variant
1154	55110689	rs113965434	C	T	p.Ala352Ala	p.Ala352Ala	c.1056G>A	synonymous_variant
1155	55110690	rs151317075	G	C	p.Ala352Gly	p.Ala352Gly	c.1055C>G	missense_variant
1156	55110690	rs151317075	G	A	p.Ala352Val	p.Ala352Val	c.1055C>T	missense_variant
1157	55110705	rs551579207	C	T	p.Arg347His	p.Arg347His	c.1040G>A	missense_variant
1158	55110705	rs551579207	C	G	p.Arg347Pro	p.Arg347Pro	c.1040G>C	missense_variant
1159	55110706	rs750983015	G	A	p.Arg347Cys	p.Arg347Cys	c.1039C>T	missense_variant
1160	55110707	rs368229078	C	A	p.Glu346Asp	p.Glu346Asp	c.1038G>T	missense_variant
1161	55110707	rs368229078	C	G	p.Glu346Asp	p.Glu346Asp	c.1038G>C	missense_variant
1162	55110713	rs367820756	C	G	p.Val344Val	p.Val344Val	c.1032G>C	synonymous_variant
1163	55110716		C	A	p.Thr343Thr	p.Thr343Thr	c.1029G>T	synonymous_variant
1164	55110716	rs201075093	C	T	p.Thr343Thr	p.Thr343Thr	c.1029G>A	synonymous_variant
1165	55110717	rs1480331564	G	T	p.Thr343Lys	p.Thr343Lys	c.1028C>A	missense_variant
1166	55110720	rs779163827	G	A	p.Ala342Val	p.Ala342Val	c.1025C>T	missense_variant
1167	55110734	rs772177647	T	C	p.Glu337Glu	p.Glu337Glu	c.1011A>G	synonymous_variant
1168	55110744	rs1373195019	C	T	p.Ser334Asn	p.Ser334Asn	c.1001G>A	missense_variant
1169	55110755	rs1171861839	A	G	p.Val330Val	p.Val330Val	c.990T>C	synonymous_variant
1170	55110759	rs957901811	A	G	p.Phe329Ser	p.Phe329Ser	c.986T>C	missense_variant
1171	55110762	rs767143286	G	T	p.Pro328His	p.Pro328His	c.983C>A	missense_variant
1172	55110767	rs1377304340	T	C	p.Glu326Glu	p.Glu326Glu	c.978A>G	splice_region_variant
1173	55110775	rs202212689	G	T	c.977-7C>A		c.977-7C>A	splice_region_variant
1174	55110776	rs557180453	A	G	c.977-8T>C		c.977-8T>C	splice_region_variant
1175	55110779	rs747749714	A	AT	c.977-12dup		c.977-12dup	intron_variant
1176	55110780	rs76308157	T	A	c.977-12A>T		c.977-12A>T	intron_variant
1177	55110780	rs5858314	T	TAAA	c.977-15_977-13dup		c.977-15_977-13dup	intron_variant
1178	55110780	rs5858314	T	TAA	c.977-14_977-13dup		c.977-14_977-13dup	intron_variant
1179	55110780	rs5858314	TA	T	c.977-13del		c.977-13del	intron_variant
1180	55110780	rs5858314	T	TA	c.977-13dup		c.977-13dup	intron_variant
1181	55110780	rs5858314	TAAA	T	c.977-15_977-13del		c.977-15_977-13del	intron_variant
1182	55110781	rs748413354	A	C	c.977-13T>G		c.977-13T>G	intron_variant
1183	55110781	rs748413354	A	T	c.977-13T>A		c.977-13T>A	intron_variant
1184	55110782	rs758547424	A	T	c.977-14T>A		c.977-14T>A	intron_variant
1185	55110782	rs760874031	A	AT	c.977-15_977-14insA		c.977-15_977-14insA	intron_variant
1186	55110783	rs764145187	A	ATT	c.977-16_977-15insAA		c.977-16_977-15insAA	intron_variant
1187	55110783		A	AT	c.977-16_977-15insA		c.977-16_977-15insA	intron_variant
1188	55110785	rs776851465	A	AG	c.977-18_977-17insC		c.977-18_977-17insC	intron_variant
1189	55110799	rs1176643109	A	G	c.977-31T>C		c.977-31T>C	intron_variant
1190	55110805	rs747070481	T	C	c.977-37A>G		c.977-37A>G	intron_variant
1191	55110806	rs769762942	G	A	c.977-38C>T		c.977-38C>T	intron_variant
1192	55110806	rs769762942	G	C	c.977-38C>G		c.977-38C>G	intron_variant
1193	55110811	rs1166840048	T	C	c.977-43A>G		c.977-43A>G	intron_variant
1194	55110820	rs749098173	G	A	c.977-52C>T		c.977-52C>T	intron_variant
1195	55110824		T	C	c.977-56A>G		c.977-56A>G	intron_variant
1196	55110829		T	A	c.977-61A>T		c.977-61A>T	intron_variant
1197	55110830		T	C	c.977-62A>G		c.977-62A>G	intron_variant
1198	55110833	rs1347360938	A	C	c.977-65T>G		c.977-65T>G	intron_variant
1199	55110838	rs937775228	A	G	c.977-70T>C		c.977-70T>C	intron_variant
1200	55113246	rs1472495313	T	C	c.976+58A>G		c.976+58A>G	intron_variant
1201	55113270	rs771799914	A	G	c.976+34T>C		c.976+34T>C	intron_variant
1202	55113272	rs952786696	G	A	c.976+32C>T		c.976+32C>T	intron_variant
1203	55113282		A	C	c.976+22T>G		c.976+22T>G	intron_variant
1204	55113284		T	A	c.976+20A>T		c.976+20A>T	intron_variant
1205	55113286	rs760227693	T	C	c.976+18A>G		c.976+18A>G	intron_variant
1206	55113294		C	T	c.976+10G>A		c.976+10G>A	intron_variant
1207	55113296	rs201195950	T	C	c.976+8A>G		c.976+8A>G	splice_region_variant
1208	55113305	rs759901011	A	G	p.His325His	p.His325His	c.975T>C	splice_region_variant
1209	55113321	rs758670911	G	A	p.Thr320Ile	p.Thr320Ile	c.959C>T	missense_variant
1210	55113358		C	T	p.Ala308Thr	p.Ala308Thr	c.922G>A	missense_variant
1211	55113362	rs58333232	G	A	p.Thr306Thr	p.Thr306Thr	c.918C>T	synonymous_variant
1212	55113365	rs1327928219	G	A	p.Tyr305Tyr	p.Tyr305Tyr	c.915C>T	synonymous_variant
1213	55113368	rs1206712190	C	T	p.Leu304Leu	p.Leu304Leu	c.912G>A	synonymous_variant
1214	55113369	rs1223412673	A	G	p.Leu304Ser	p.Leu304Ser	c.911T>C	missense_variant
1215	55113376		G	T	p.Gln302Lys	p.Gln302Lys	c.904C>A	missense_variant
1216	55113377	rs749255838	G	A	p.Asp301Asp	p.Asp301Asp	c.903C>T	synonymous_variant
1217	55113384	rs375035755	C	T	p.Arg299Gln	p.Arg299Gln	c.896G>A	missense_variant
1218	55113385	rs368062574	G	A	p.Arg299Trp	p.Arg299Trp	c.895C>T	missense_variant
1219	55113391	rs2305948	C	T	p.Val297Ile	p.Val297Ile	c.889G>A	missense_variant
1220	55113394	rs1212024668	C	A	p.Gly296Cys	p.Gly296Cys	c.886G>T	missense_variant
1221	55113395	rs760317706	A	G	p.Asp295Asp	p.Asp295Asp	c.885T>C	synonymous_variant
1222	55113398		T	C	p.Ile294Met	p.Ile294Met	c.882A>G	missense_variant
1223	55113417	rs1157961221	A	T	p.Phe288Tyr	p.Phe288Tyr	c.863T>A	missense_variant
1224	55113437		A	G	p.Ser281Ser	p.Ser281Ser	c.843T>C	synonymous_variant
1225	55113438	rs931215054	G	C	p.Ser281Cys	p.Ser281Cys	c.842C>G	missense_variant
1226	55113439		A	T	p.Ser281Thr	p.Ser281Thr	c.841T>A	missense_variant
1227	55113441		T	C	p.Gln280Arg	p.Gln280Arg	c.839A>G	missense_variant
1228	55113443	rs753148014	G	A	p.Thr279Thr	p.Thr279Thr	c.837C>T	synonymous_variant
1229	55113444	rs532356730	G	C	p.Thr279Ser	p.Thr279Ser	c.836C>G	missense_variant
1230	55113456	rs764358120	C	T	p.Arg275Gln	p.Arg275Gln	c.824G>A	missense_variant
1231	55113458	rs552152695	G	A	p.Asn274Asn	p.Asn274Asn	c.822C>T	synonymous_variant
1232	55113463	rs1486918987	C	A	p.Val273Leu	p.Val273Leu	c.817G>T	missense_variant
1233	55113467	rs371483510	T	C	p.Lys271Lys	p.Lys271Lys	c.813A>G	synonymous_variant
1234	55113472	rs954623491	T	C	p.Lys270Glu	p.Lys270Glu	c.808A>G	missense_variant
1235	55113474	rs562809810	T	C	p.His269Arg	p.His269Arg	c.806A>G	missense_variant
1236	55113484	rs1274832669	G	A	c.799-3C>T		c.799-3C>T	splice_region_variant
1237	55113491		A	G	c.799-10T>C		c.799-10T>C	intron_variant
1238	55113493	rs370413822	A	G	c.799-12T>C		c.799-12T>C	intron_variant
1239	55113524	rs1397342384	A	G	c.799-43T>C		c.799-43T>C	intron_variant
1240	55113525	rs200313074	C	T	c.799-44G>A		c.799-44G>A	intron_variant
1241	55114051		C	T	c.798+75G>A		c.798+75G>A	intron_variant
1242	55114072	rs7692791	C	T	c.798+54G>A		c.798+54G>A	intron_variant
1243	55114081	rs1442015576	A	G	c.798+45T>C		c.798+45T>C	intron_variant
1244	55114094	rs1293302586	T	C	c.798+32A>G		c.798+32A>G	intron_variant
1245	55114107	rs959821504	T	C	c.798+19A>G		c.798+19A>G	intron_variant
1246	55114116	rs745341037	T	C	c.798+10A>G		c.798+10A>G	intron_variant
1247	55114120	rs374116762	C	T	c.798+6G>A		c.798+6G>A	splice_region_variant
1248	55114121	rs368099993	G	A	c.798+5C>T		c.798+5C>T	splice_region_variant
1249	55114129	rs189635816	C	T	p.Ser265Ser	p.Ser265Ser	c.795G>A	synonymous_variant
1250	55114130	rs539911006	G	A	p.Ser265Leu	p.Ser265Leu	c.794C>T	missense_variant
1251	55114133	rs1438804033	G	A	p.Ser264Phe	p.Ser264Phe	c.791C>T	missense_variant
1252	55114134	rs890291692	A	T	p.Ser264Thr	p.Ser264Thr	c.790T>A	missense_variant
1253	55114137	rs587778429	G	T	p.Pro263Thr	p.Pro263Thr	c.787C>A	missense_variant
1254	55114137	rs587778429	G	A	p.Pro263Ser	p.Pro263Ser	c.787C>T	missense_variant
1255	55114147	rs750554254	G	C	p.Asn259Lys	p.Asn259Lys	c.777C>G	missense_variant
1256	55114157		A	G	p.Ile256Thr	p.Ile256Thr	c.767T>C	missense_variant
1257	55114159	rs142474707	C	G	p.Gly255Gly	p.Gly255Gly	c.765G>C	synonymous_variant
1258	55114164	rs777739723	C	A	p.Val254Leu	p.Val254Leu	c.760G>T	missense_variant
1259	55114164	rs777739723	C	T	p.Val254Met	p.Val254Met	c.760G>A	missense_variant
1260	55114170	rs1288161339	G	A	p.Leu252Leu	p.Leu252Leu	c.754C>T	synonymous_variant
1261	55114180	rs1228312632	T	G	p.Ala248Ala	p.Ala248Ala	c.744A>C	synonymous_variant
1262	55114183	rs146541510	T	G	p.Thr247Thr	p.Thr247Thr	c.741A>C	synonymous_variant
1263	55114184	rs371956918	G	A	p.Thr247Ile	p.Thr247Ile	c.740C>T	missense_variant
1264	55114190	rs1364766741	T	C	p.Asn245Ser	p.Asn245Ser	c.734A>G	missense_variant
1265	55114200	rs587778428	G	A	p.Leu242Phe	p.Leu242Phe	c.724C>T	missense_variant
1266	55114203	rs1443344654	T	G	p.Lys241Gln	p.Lys241Gln	c.721A>C	missense_variant
1267	55114205	rs774917471	T	C	p.Glu240Gly	p.Glu240Gly	c.719A>G	missense_variant
1268	55114208	rs374339331	C	T	p.Gly239Glu	p.Gly239Glu	c.716G>A	missense_variant
1269	55114212	rs750699220	C	T	p.Val238Ile	p.Val238Ile	c.712G>A	missense_variant
1270	55114213		A	G	p.Ser237Ser	p.Ser237Ser	c.711T>C	synonymous_variant
1271	55114216	rs56181155	T	C	p.Leu236Leu	p.Leu236Leu	c.708A>G	synonymous_variant
1272	55114217	rs1274905750	A	G	p.Leu236Pro	p.Leu236Pro	c.707T>C	missense_variant
1273	55114230	rs978813018	G	T	p.His232Asn	p.His232Asn	c.694C>A	missense_variant
1274	55114234	rs762050543	C	T	p.Pro230Pro	p.Pro230Pro	c.690G>A	synonymous_variant
1275	55114235	rs1357848255	G	A	p.Pro230Leu	p.Pro230Leu	c.689C>T	missense_variant
1276	55114253	rs78036574	T	C	p.Tyr224Cys	p.Tyr224Cys	c.671A>G	missense_variant
1277	55114271	rs766374165	G	A	c.659-6C>T		c.659-6C>T	splice_region_variant
1278	55114275		G	C	c.659-10C>G		c.659-10C>G	intron_variant
1279	55114282	rs754553167	GA	G	c.659-18del		c.659-18del	intron_variant
1280	55114282	rs754553167	G	GA	c.659-18dup		c.659-18dup	intron_variant
1281	55114283	rs758431220	A	G	c.659-18T>C		c.659-18T>C	intron_variant
1282	55114287	rs1335393479	A	C	c.659-22T>G		c.659-22T>G	intron_variant
1283	55114289	rs2305949	C	A	c.659-24G>T		c.659-24G>T	intron_variant
1284	55114289	rs2305949	C	T	c.659-24G>A		c.659-24G>A	intron_variant
1285	55114292	rs756988986	A	G	c.659-27T>C		c.659-27T>C	intron_variant
1286	55114295	rs1438933533	A	G	c.659-30T>C		c.659-30T>C	intron_variant
1287	55114296	rs1560522847	T	C	c.659-31A>G		c.659-31A>G	intron_variant
1288	55114296	rs752425475	T	TGA	c.659-33_659-32dup		c.659-33_659-32dup	intron_variant
1289	55114297	rs780983395	G	A	c.659-32C>T		c.659-32C>T	intron_variant
1290	55114301	rs1203607228	G	C	c.659-36C>G		c.659-36C>G	intron_variant
1291	55114301	rs1203607228	G	A	c.659-36C>T		c.659-36C>T	intron_variant
1292	55114316	rs755755449	T	C	c.659-51A>G		c.659-51A>G	intron_variant
1293	55114319		C	T	c.659-54G>A		c.659-54G>A	intron_variant
1294	55114323		GC	G	c.659-59del		c.659-59del	intron_variant
1295	55114324	rs917033913	C	T	c.659-59G>A		c.659-59G>A	intron_variant
1296	55114326	rs1236781298	C	A	c.659-61G>T		c.659-61G>T	intron_variant
1297	55114329	rs1053166961	A	G	c.659-64T>C		c.659-64T>C	intron_variant
1298	55114333	rs1274056708	ATT	A	c.659-70_659-69del		c.659-70_659-69del	intron_variant
1299	55114333	rs1274056708	A	AT	c.659-69dup		c.659-69dup	intron_variant
1300	55114802	rs1171251596	C	A	c.658+72G>T		c.658+72G>T	intron_variant
1301	55114807	rs569431757	T	C	c.658+67A>G		c.658+67A>G	intron_variant
1302	55114809	rs201155074	G	A	c.658+65C>T		c.658+65C>T	intron_variant
1303	55114809	rs201155074	G	T	c.658+65C>A		c.658+65C>A	intron_variant
1304	55114810		T	C	c.658+64A>G		c.658+64A>G	intron_variant
1305	55114820	rs1178751441	G	T	c.658+54C>A		c.658+54C>A	intron_variant
1306	55114833	rs1188244920	G	C	c.658+41C>G		c.658+41C>G	intron_variant
1307	55114834	rs769188055	G	A	c.658+40C>T		c.658+40C>T	intron_variant
1308	55114843	rs1446925442	T	C	c.658+31A>G		c.658+31A>G	intron_variant
1309	55114848	rs773558455	G	A	c.658+26C>T		c.658+26C>T	intron_variant
1310	55114854	rs1180115447	G	A	c.658+20C>T		c.658+20C>T	intron_variant
1311	55114855		A	G	c.658+19T>C		c.658+19T>C	intron_variant
1312	55114856	rs368402853	A	C	c.658+18T>G		c.658+18T>G	intron_variant
1313	55114858	rs1161551427	G	A	c.658+16C>T		c.658+16C>T	intron_variant
1314	55114864	rs373872343	G	A	c.658+10C>T		c.658+10C>T	intron_variant
1315	55114876	rs200675807	A	G	p.Val219Ala	p.Val219Ala	c.656T>C	missense_variant
1316	55114880	rs145458680	C	T	p.Val218Ile	p.Val218Ile	c.652G>A	missense_variant
1317	55114881	rs761745459	G	A	p.Val217Val	p.Val217Val	c.651C>T	synonymous_variant
1318	55114889	rs553403491	T	C	p.Ile215Val	p.Ile215Val	c.643A>G	missense_variant
1319	55114893	rs750185585	C	T	p.Met213Ile	p.Met213Ile	c.639G>A	missense_variant
1320	55114894		A	C	p.Met213Arg	p.Met213Arg	c.638T>G	missense_variant
1321	55114897	rs576918743	A	G	p.Ile212Thr	p.Ile212Thr	c.635T>C	missense_variant
1322	55114897		A	C	p.Ile212Ser	p.Ile212Ser	c.635T>G	missense_variant
1323	55114898		T	C	p.Ile212Val	p.Ile212Val	c.634A>G	missense_variant
1324	55114902	rs1259259717	C	G	p.Gln210His	p.Gln210His	c.630G>C	missense_variant
1325	55114903		T	A	p.Gln210Leu	p.Gln210Leu	c.629A>T	missense_variant
1326	55114914	rs1309220304	A	G	p.Asp206Asp	p.Asp206Asp	c.618T>C	synonymous_variant
1327	55114918	rs376768864	T	C	p.Asn205Ser	p.Asn205Ser	c.614A>G	missense_variant
1328	55114920	rs369722306	A	G	p.Ile204Ile	p.Ile204Ile	c.612T>C	synonymous_variant
1329	55114920	rs369722306	A	T	p.Ile204Ile	p.Ile204Ile	c.612T>A	synonymous_variant
1330	55114921	rs1029548195	A	T	p.Ile204Asn	p.Ile204Asn	c.611T>A	missense_variant
1331	55114928	rs1435582465	C	T	p.Ala202Thr	p.Ala202Thr	c.604G>A	missense_variant
1332	55114945	rs747377229	C	G	p.Gly196Ala	p.Gly196Ala	c.587G>C	missense_variant
1333	55114951	rs771346559	T	A	p.Tyr194Phe	p.Tyr194Phe	c.581A>T	missense_variant
1334	55114954	rs1051109918	C	T	p.Ser193Asn	p.Ser193Asn	c.578G>A	missense_variant
1335	55114957		A	G	p.Ile192Thr	p.Ile192Thr	c.575T>C	missense_variant
1336	55114967	rs202219558	T	C	p.Ser189Gly	p.Ser189Gly	c.565A>G	missense_variant
1337	55114973		T	C	p.Ile187Val	p.Ile187Val	c.559A>G	missense_variant
1338	55114998	rs770000317	G	A	p.Ser178Ser	p.Ser178Ser	c.534C>T	synonymous_variant
1339	55115002	rs1039246901	A	G	p.Ile177Thr	p.Ile177Thr	c.530T>C	missense_variant
1340	55115007	rs377524308	G	A	p.Asn175Asn	p.Asn175Asn	c.525C>T	synonymous_variant
1341	55115012	rs750228899	C	T	p.Gly174Ser	p.Gly174Ser	c.520G>A	missense_variant
1342	55115018	rs370917098	G	C	p.Pro172Ala	p.Pro172Ala	c.514C>G	missense_variant
1343	55115018	rs370917098	G	A	p.Pro172Ser	p.Pro172Ser	c.514C>T	missense_variant
1344	55115021	rs766074747	C	G	p.Val171Leu	p.Val171Leu	c.511G>C	missense_variant
1345	55115024	rs1349105196	A	G	p.Phe170Leu	p.Phe170Leu	c.508T>C	missense_variant
1346	55115025	rs1013846045	T	C	p.Arg169Arg	p.Arg169Arg	c.507A>G	synonymous_variant
1347	55115030	rs753500578	T	C	p.Lys168Glu	p.Lys168Glu	c.502A>G	missense_variant
1348	55115056	rs1396721390	A	G	c.490-14T>C		c.490-14T>C	intron_variant
1349	55115058	rs758877144	A	G	c.490-16T>C		c.490-16T>C	intron_variant
1350	55115061	rs1171100333	T	A	c.490-19A>T		c.490-19A>T	intron_variant
1351	55115062	rs1227652132	A	T	c.490-20T>A		c.490-20T>A	intron_variant
1352	55115071	rs757709382	T	G	c.490-29A>C		c.490-29A>C	intron_variant
1353	55115073	rs781636487	A	C	c.490-31T>G		c.490-31T>G	intron_variant
1354	55115075		T	C	c.490-33A>G		c.490-33A>G	intron_variant
1355	55115082	rs775668049	C	T	c.490-40G>A		c.490-40G>A	intron_variant
1356	55115083	rs770095400	C	T	c.490-41G>A		c.490-41G>A	intron_variant
1357	55115096	rs1443689805	CATGTACAATGATCACT	C	c.490-70_490-55del		c.490-70_490-55del	intron_variant
1358	55115100	rs1206882928	T	C	c.490-58A>G		c.490-58A>G	intron_variant
1359	55115108	rs1233300147	T	C	c.490-66A>G		c.490-66A>G	intron_variant
1360	55115109	rs1023943520	C	G	c.490-67G>C		c.490-67G>C	intron_variant
1361	55115112	rs1230562880	T	C	c.490-70A>G		c.490-70A>G	intron_variant
1362	55115114		A	C	c.490-72T>G		c.490-72T>G	intron_variant
1363	55115116	rs1482791571	G	A	c.490-74C>T		c.490-74C>T	intron_variant
1364	55115211		A	T	c.489+70T>A		c.489+70T>A	intron_variant
1365	55115218		C	T	c.489+63G>A		c.489+63G>A	intron_variant
1366	55115223	rs955628955	T	C	c.489+58A>G		c.489+58A>G	intron_variant
1367	55115226	rs1206419136	A	C	c.489+55T>G		c.489+55T>G	intron_variant
1368	55115246	rs1204981828	A	C	c.489+35T>G		c.489+35T>G	intron_variant
1369	55115248	rs1267891550	A	C	c.489+33T>G		c.489+33T>G	intron_variant
1370	55115250	rs1275539963	T	G	c.489+31A>C		c.489+31A>C	intron_variant
1371	55115256	rs888109404	G	A	c.489+25C>T		c.489+25C>T	intron_variant
1372	55115258	rs771973089	C	T	c.489+23G>A		c.489+23G>A	intron_variant
1373	55115259	rs1202582003	G	A	c.489+22C>T		c.489+22C>T	intron_variant
1374	55115262	rs369838092	T	A	c.489+19A>T		c.489+19A>T	intron_variant
1375	55115281		T	C	p.Ala163Ala	p.Ala163Ala	c.489A>G	splice_region_variant
1376	55115293	rs376919634	C	T	p.Val159Val	p.Val159Val	c.477G>A	synonymous_variant
1377	55115295	rs545112274	C	G	p.Val159Leu	p.Val159Leu	c.475G>C	missense_variant
1378	55115295	rs545112274	C	T	p.Val159Met	p.Val159Met	c.475G>A	missense_variant
1379	55115296	rs137944919	G	A	p.Asn158Asn	p.Asn158Asn	c.474C>T	synonymous_variant
1380	55115304	rs561980415	T	C	p.Asn156Asp	p.Asn156Asp	c.466A>G	missense_variant
1381	55115311	rs55732301	G	C	p.Ser153Ser	p.Ser153Ser	c.459C>G	synonymous_variant
1382	55115314	rs530078483	C	T	p.Gly152Gly	p.Gly152Gly	c.456G>A	synonymous_variant
1383	55115315		C	G	p.Gly152Ala	p.Gly152Ala	c.455G>C	missense_variant
1384	55115317	rs746215344	G	A	p.Leu151Leu	p.Leu151Leu	c.453C>T	synonymous_variant
1385	55115319	rs1412296372	G	A	p.Leu151Phe	p.Leu151Phe	c.451C>T	missense_variant
1386	55115330	rs935833761	A	G	p.Val147Ala	p.Val147Ala	c.440T>C	missense_variant
1387	55115335	rs1407026076	A	G	p.Thr145Thr	p.Thr145Thr	c.435T>C	synonymous_variant
1388	55115346	rs1169625355	T	C	p.Lys142Glu	p.Lys142Glu	c.424A>G	missense_variant
1389	55115349	rs749382062	T	C	p.Asn141Asp	p.Asn141Asp	c.421A>G	missense_variant
1390	55115350	rs988056261	C	A	p.Glu140Asp	p.Glu140Asp	c.420G>T	missense_variant
1391	55115358	rs1216301937	T	G	p.Ile138Leu	p.Ile138Leu	c.412A>C	missense_variant
1392	55115359	rs540637434	G	A	p.Tyr137Tyr	p.Tyr137Tyr	c.411C>T	synonymous_variant
1393	55115361		A	G	p.Tyr137His	p.Tyr137His	c.409T>C	missense_variant
1394	55115362	rs1370401388	C	T	p.Val136Val	p.Val136Val	c.408G>A	synonymous_variant
1395	55115364	rs35636987	C	T	p.Val136Met	p.Val136Met	c.406G>A	missense_variant
1396	55115365	rs143615792	G	A	p.Val135Val	p.Val135Val	c.405C>T	synonymous_variant
1397	55115374	rs776457042	T	C	p.Gln132Gln	p.Gln132Gln	c.396A>G	synonymous_variant
1398	55115378		T	C	p.Asp131Gly	p.Asp131Gly	c.392A>G	missense_variant
1399	55115394	rs1446690125	T	G	p.Ile126Leu	p.Ile126Leu	c.376A>C	missense_variant
1400	55115411	rs937516900	T	C	p.Asp120Gly	p.Asp120Gly	c.359A>G	missense_variant
1401	55115426	rs368448261	A	G	c.359-15T>C		c.359-15T>C	intron_variant
1402	55115435	rs375962644	A	G	c.359-24T>C		c.359-24T>C	intron_variant
1403	55115437	rs1288398859	T	C	c.359-26A>G		c.359-26A>G	intron_variant
1404	55115440	rs1245393274	G	C	c.359-29C>G		c.359-29C>G	intron_variant
1405	55115441	rs775222427	T	C	c.359-30A>G		c.359-30A>G	intron_variant
1406	55115443	rs762447243	A	C	c.359-32T>G		c.359-32T>G	intron_variant
1407	55115445	rs1226464286	T	C	c.359-34A>G		c.359-34A>G	intron_variant
1408	55115449		A	G	c.359-38T>C		c.359-38T>C	intron_variant
1409	55115455	rs532671268	T	C	c.359-44A>G		c.359-44A>G	intron_variant
1410	55115462	rs762462246	G	A	c.359-51C>T		c.359-51C>T	intron_variant
1411	55115466		G	C	c.359-55C>G		c.359-55C>G	intron_variant
1412	55115469		A	T	c.359-58T>A		c.359-58T>A	intron_variant
1413	55115473	rs552471969	T	C	c.359-62A>G		c.359-62A>G	intron_variant
1414	55115479	rs569403963	T	C	c.359-68A>G		c.359-68A>G	intron_variant
1415	55115483		T	G	c.359-72A>C		c.359-72A>C	intron_variant
1416	55118531		ATTC	A	c.358+70_358+72del		c.358+70_358+72del	intron_variant
1417	55118531	rs952225197	A	G	c.358+73T>C		c.358+73T>C	intron_variant
1418	55118533		T	A	c.358+71A>T		c.358+71A>T	intron_variant
1419	55118541	rs1464478649	G	A	c.358+63C>T		c.358+63C>T	intron_variant
1420	55118544	rs1177299616	C	G	c.358+60G>C		c.358+60G>C	intron_variant
1421	55118548	rs1008837090	T	C	c.358+56A>G		c.358+56A>G	intron_variant
1422	55118550	rs758170996	G	T	c.358+54C>A		c.358+54C>A	intron_variant
1423	55118552	rs1245265273	C	A	c.358+52G>T		c.358+52G>T	intron_variant
1424	55118556	rs540139325	T	C	c.358+48A>G		c.358+48A>G	intron_variant
1425	55118561	rs186084824	C	G	c.358+43G>C		c.358+43G>C	intron_variant
1426	55118569	rs780222316	G	C	c.358+35C>G		c.358+35C>G	intron_variant
1427	55118572	rs754090599	A	T	c.358+32T>A		c.358+32T>A	intron_variant
1428	55118573	rs201063638	C	T	c.358+31G>A		c.358+31G>A	intron_variant
1429	55118574	rs190953727	G	T	c.358+30C>A		c.358+30C>A	intron_variant
1430	55118574	rs190953727	G	A	c.358+30C>T		c.358+30C>T	intron_variant
1431	55118585	rs769636059	A	G	c.358+19T>C		c.358+19T>C	intron_variant
1432	55118597	rs368552298	C	G	c.358+7G>C		c.358+7G>C	splice_region_variant
1433	55118609	rs1336748999	A	C	p.Val118Gly	p.Val118Gly	c.353T>G	missense_variant
1434	55118610	rs774047462	C	T	p.Val118Ile	p.Val118Ile	c.352G>A	missense_variant
1435	55118612	rs1226422486	T	C	p.Tyr117Cys	p.Tyr117Cys	c.350A>G	missense_variant
1436	55118622	rs750976890	T	C	p.Ile114Val	p.Ile114Val	c.340A>G	missense_variant
1437	55118626	rs1031416918	C	G	p.Ser112Ser	p.Ser112Ser	c.336G>C	synonymous_variant
1438	55118627	rs761016513	G	A	p.Ser112Leu	p.Ser112Leu	c.335C>T	missense_variant
1439	55118645	rs781436993	C	T	p.Arg106Gln	p.Arg106Gln	c.317G>A	missense_variant
1440	55118646	rs200544155	G	A	p.Arg106Trp	p.Arg106Trp	c.316C>T	missense_variant
1441	55118646	rs200544155	G	C	p.Arg106Gly	p.Arg106Gly	c.316C>G	missense_variant
1442	55118646		G	T	p.Arg106Arg	p.Arg106Arg	c.316C>A	synonymous_variant
1443	55118647	rs752840054	G	A	p.Tyr105Tyr	p.Tyr105Tyr	c.315C>T	synonymous_variant
1444	55118658	rs199760220	T	C	p.Lys102Glu	p.Lys102Glu	c.304A>G	missense_variant
1445	55118667	rs549011478	C	T	p.Gly99Arg	p.Gly99Arg	c.295G>A	missense_variant
1446	55118679	rs371800274	C	T	p.Gly95Arg	p.Gly95Arg	c.283G>A	missense_variant
1447	55118680	rs75557765	G	C	p.Ile94Met	p.Ile94Met	c.282C>G	missense_variant
1448	55118680	rs75557765	G	A	p.Ile94Ile	p.Ile94Ile	c.282C>T	synonymous_variant
1449	55118683	rs902467090	C	T	p.Val93Val	p.Val93Val	c.279G>A	synonymous_variant
1450	55118703	rs1238505743	T	C	p.Thr87Ala	p.Thr87Ala	c.259A>G	missense_variant
1451	55118704	rs146012303	C	T	p.Lys86Lys	p.Lys86Lys	c.258G>A	synonymous_variant
1452	55118706	rs1337972568	T	C	p.Lys86Glu	p.Lys86Glu	c.256A>G	missense_variant
1453	55118710	rs1236160208	G	C	p.Phe84Leu	p.Phe84Leu	c.252C>G	missense_variant
1454	55118719	rs777091979	A	G	p.Asp81Asp	p.Asp81Asp	c.243T>C	synonymous_variant
1455	55118721	rs201719457	C	T	p.Asp81Asn	p.Asp81Asn	c.241G>A	missense_variant
1456	55118722	rs141577956	G	A	p.Ser80Ser	p.Ser80Ser	c.240C>T	synonymous_variant
1457	55118733	rs1426723088	T	A	p.Thr77Ser	p.Thr77Ser	c.229A>T	missense_variant
1458	55118735	rs578077737	A	T	p.Val76Glu	p.Val76Glu	c.227T>A	missense_variant
1459	55118741	rs201868960	A	G	p.Val74Ala	p.Val74Ala	c.221T>C	missense_variant
1460	55118742		C	A	p.Val74Leu	p.Val74Leu	c.220G>T	missense_variant
1461	55118742		C	T	p.Val74Met	p.Val74Met	c.220G>A	missense_variant
1462	55118748	rs779854548	G	C	p.Gln72Glu	p.Gln72Glu	c.214C>G	missense_variant
1463	55118752	rs80237618	A	T	p.Ser70Arg	p.Ser70Arg	c.210T>A	missense_variant
1464	55118755	rs754837622	G	A	p.Gly69Gly	p.Gly69Gly	c.207C>T	synonymous_variant
1465	55118755	rs754837622	G	C	p.Gly69Gly	p.Gly69Gly	c.207C>G	synonymous_variant
1466	55118758	rs141641290	A	G	p.Ser68Ser	p.Ser68Ser	c.204T>C	synonymous_variant
1467	55118764	rs62638746	A	T	p.Asn66Lys	p.Asn66Lys	c.198T>A	missense_variant
1468	55118765	rs559345398	T	C	p.Asn66Ser	p.Asn66Ser	c.197A>G	missense_variant
1469	55118782	rs771533957	G	A	p.Asp60Asp	p.Asp60Asp	c.180C>T	synonymous_variant
1470	55118792	rs139047809	C	G	p.Arg57Thr	p.Arg57Thr	c.170G>C	missense_variant
1471	55118792	rs139047809	C	T	p.Arg57Lys	p.Arg57Lys	c.170G>A	missense_variant
1472	55118808	rs763211492	A	G	c.162-8T>C		c.162-8T>C	splice_region_variant
1473	55118818	rs751730294	G	A	c.162-18C>T		c.162-18C>T	intron_variant
1474	55118819	rs150894236	G	A	c.162-19C>T		c.162-19C>T	intron_variant
1475	55118822	rs1319858510	G	A	c.162-22C>T		c.162-22C>T	intron_variant
1476	55118823	rs767579380	G	T	c.162-23C>A		c.162-23C>A	intron_variant
1477	55118835	rs923835066	A	T	c.162-35T>A		c.162-35T>A	intron_variant
1478	55118842	rs1008702810	G	A	c.162-42C>T		c.162-42C>T	intron_variant
1479	55118850	rs367842850	G	A	c.162-50C>T		c.162-50C>T	intron_variant
1480	55118853		T	C	c.162-53A>G		c.162-53A>G	intron_variant
1481	55118857	rs866037702	T	G	c.162-57A>C		c.162-57A>C	intron_variant
1482	55118858	rs1031029723	C	T	c.162-58G>A		c.162-58G>A	intron_variant
1483	55118869	rs749321034	G	A	c.162-69C>T		c.162-69C>T	intron_variant
1484	55118874	rs1010962039	T	C	c.162-74A>G		c.162-74A>G	intron_variant
1485	55121024	rs1472617605	C	T	c.161+73G>A		c.161+73G>A	intron_variant
1486	55121025	rs1192893257	T	G	c.161+72A>C		c.161+72A>C	intron_variant
1487	55121038	rs189391807	C	T	c.161+59G>A		c.161+59G>A	intron_variant
1488	55121042	rs1260971387	C	T	c.161+55G>A		c.161+55G>A	intron_variant
1489	55121043	rs1194127419	A	G	c.161+54T>C		c.161+54T>C	intron_variant
1490	55121051	rs746585935	A	G	c.161+46T>C		c.161+46T>C	intron_variant
1491	55121052	rs761857783	TCA	T	c.161+43_161+44del		c.161+43_161+44del	intron_variant
1492	55121056	rs41449845	T	G	c.161+41A>C		c.161+41A>C	intron_variant
1493	55121056		T	C	c.161+41A>G		c.161+41A>G	intron_variant
1494	55121062		A	G	c.161+35T>C		c.161+35T>C	intron_variant
1495	55121069	rs371301781	G	T	c.161+28C>A		c.161+28C>A	intron_variant
1496	55121081	rs1001731973	T	C	c.161+16A>G		c.161+16A>G	intron_variant
1497	55121085	rs768928064	A	G	c.161+12T>C		c.161+12T>C	intron_variant
1498	55121086	rs1161576536	T	C	c.161+11A>G		c.161+11A>G	intron_variant
1499	55121091	rs774453303	C	A	c.161+6G>T		c.161+6G>T	splice_region_variant
1500	55121092	rs762032018	C	T	c.161+5G>A		c.161+5G>A	splice_region_variant
1501	55121099		G	A	p.Cys53Cys	p.Cys53Cys	c.159C>T	splice_region_variant
1502	55121105	rs1373791078	A	G	p.Ile51Ile	p.Ile51Ile	c.153T>C	synonymous_variant
1503	55121106	rs767520653	A	C	p.Ile51Ser	p.Ile51Ser	c.152T>G	missense_variant
1504	55121113	rs759593169	G	C	p.Leu49Val	p.Leu49Val	c.145C>G	missense_variant
1505	55121117		T	G	p.Thr47Thr	p.Thr47Thr	c.141A>C	synonymous_variant
1506	55121117		T	C	p.Thr47Thr	p.Thr47Thr	c.141A>G	synonymous_variant
1507	55121118	rs752603620	G	C	p.Thr47Arg	p.Thr47Arg	c.140C>G	missense_variant
1508	55121124		G	T	p.Ala45Asp	p.Ala45Asp	c.134C>A	missense_variant
1509	55121133	rs1251565662	G	T	p.Thr42Lys	p.Thr42Lys	c.125C>A	missense_variant
1510	55121138		T	C	p.Ile40Met	p.Ile40Met	c.120A>G	missense_variant
1511	55121141	rs1318860280	G	T	p.Asp39Glu	p.Asp39Glu	c.117C>A	missense_variant
1512	55121142	rs1179688174	T	C	p.Asp39Gly	p.Asp39Gly	c.116A>G	missense_variant
1513	55121150		T	C	p.Ile36Met	p.Ile36Met	c.108A>G	missense_variant
1514	55121157		A	G	p.Leu34Pro	p.Leu34Pro	c.101T>C	missense_variant
1515	55121158	rs1209871142	G	T	p.Leu34Ile	p.Leu34Ile	c.100C>A	missense_variant
1516	55121159	rs149870540	C	T	p.Arg33Arg	p.Arg33Arg	c.99G>A	synonymous_variant
1517	55121164	rs962957956	G	A	p.Pro32Ser	p.Pro32Ser	c.94C>T	missense_variant
1518	55121165	rs745352790	C	T	p.Leu31Leu	p.Leu31Leu	c.93G>A	synonymous_variant
1519	55121165	rs745352790	C	A	p.Leu31Leu	p.Leu31Leu	c.93G>T	synonymous_variant
1520	55121166	rs375465295	A	G	p.Leu31Pro	p.Leu31Pro	c.92T>C	missense_variant
1521	55121170	rs1195910028	C	A	p.Asp30Tyr	p.Asp30Tyr	c.88G>T	missense_variant
1522	55121171	rs1252246435	A	C	p.Leu29Leu	p.Leu29Leu	c.87T>G	synonymous_variant
1523	55121182	rs1193669433	T	G	p.Ser26Arg	p.Ser26Arg	c.76A>C	missense_variant
1524	55121206	rs576450734	A	G	c.68-16T>C		c.68-16T>C	intron_variant
1525	55121208	rs774742018	A	C	c.68-18T>G		c.68-18T>G	intron_variant
1526	55121212	rs1477485642	G	T	c.68-22C>A		c.68-22C>A	intron_variant
1527	55121216		G	A	c.68-26C>T		c.68-26C>T	intron_variant
1528	55121217	rs761959024	T	C	c.68-27A>G		c.68-27A>G	intron_variant
1529	55121226	rs79661795	C	G	c.68-36G>C		c.68-36G>C	intron_variant
1530	55121230	rs1301876938	G	C	c.68-40C>G		c.68-40C>G	intron_variant
1531	55121234	rs1409493841	G	A	c.68-44C>T		c.68-44C>T	intron_variant
1532	55121235	rs1039554956	A	G	c.68-45T>C		c.68-45T>C	intron_variant
1533	55121236	rs1457343984	C	T	c.68-46G>A		c.68-46G>A	intron_variant
1534	55121250	rs150311401	C	T	c.68-60G>A		c.68-60G>A	intron_variant
1535	55121261	rs911337814	C	T	c.68-71G>A		c.68-71G>A	intron_variant
1536	55121264	rs574754784	T	C	c.68-74A>G		c.68-74A>G	intron_variant
1537	55125161	rs939403328	G	A	c.67+66C>T		c.67+66C>T	intron_variant
1538	55125164	rs1043558883	T	G	c.67+63A>C		c.67+63A>C	intron_variant
1539	55125168	rs1328298379	A	G	c.67+59T>C		c.67+59T>C	intron_variant
1540	55125169	rs1056658814	G	C	c.67+58C>G		c.67+58C>G	intron_variant
1541	55125176	rs765321302	T	C	c.67+51A>G		c.67+51A>G	intron_variant
1542	55125176	rs765321302	T	G	c.67+51A>C		c.67+51A>C	intron_variant
1543	55125178	rs1386378737	C	T	c.67+49G>A		c.67+49G>A	intron_variant
1544	55125179	rs188892767	G	A	c.67+48C>T		c.67+48C>T	intron_variant
1545	55125181		C	G	c.67+46G>C		c.67+46G>C	intron_variant
1546	55125187		C	T	c.67+40G>A		c.67+40G>A	intron_variant
1547	55125188	rs1477356858	C	G	c.67+39G>C		c.67+39G>C	intron_variant
1548	55125189	rs369301889	G	A	c.67+38C>T		c.67+38C>T	intron_variant
1549	55125193	rs199873907	T	A	c.67+34A>T		c.67+34A>T	intron_variant
1550	55125198		G	A	c.67+29C>T		c.67+29C>T	intron_variant
1551	55125199		C	A	c.67+28G>T		c.67+28G>T	intron_variant
1552	55125200	rs1435994262	C	A	c.67+27G>T		c.67+27G>T	intron_variant
1553	55125201	rs751347443	T	A	c.67+26A>T		c.67+26A>T	intron_variant
1554	55125202	rs1007267693	T	G	c.67+25A>C		c.67+25A>C	intron_variant
1555	55125208	rs1375572382	T	C	c.67+19A>G		c.67+19A>G	intron_variant
1556	55125209	rs756900989	C	T	c.67+18G>A		c.67+18G>A	intron_variant
1557	55125214	rs551929498	G	A	c.67+13C>T		c.67+13C>T	intron_variant
1558	55125218	rs1423031085	G	A	c.67+9C>T		c.67+9C>T	intron_variant
1559	55125228	rs749995733	C	T	p.Val22Val	p.Val22Val	c.66G>A	splice_region_variant
1560	55125234	rs755638095	G	A	p.Ala20Ala	p.Ala20Ala	c.60C>T	synonymous_variant
1561	55125237	rs997194004	G	A	p.Ala19Ala	p.Ala19Ala	c.57C>T	synonymous_variant
1562	55125240	rs144880599	C	G	p.Arg18Arg	p.Arg18Arg	c.54G>C	synonymous_variant
1563	55125241	rs1366052063	C	G	p.Arg18Pro	p.Arg18Pro	c.53G>C	missense_variant
1564	55125244	rs749829755	G	T	p.Thr17Asn	p.Thr17Asn	c.50C>A	missense_variant
1565	55125246	rs755460230	C	A	p.Glu16Asp	p.Glu16Asp	c.48G>T	missense_variant
1566	55125246	rs755460230	C	G	p.Glu16Asp	p.Glu16Asp	c.48G>C	missense_variant
1567	55125250		A	C	p.Val15Gly	p.Val15Gly	c.44T>G	missense_variant
1568	55125251	rs1023303395	C	T	p.Val15Met	p.Val15Met	c.43G>A	missense_variant
1569	55125267	rs1490446016	G	A	p.Val9Val	p.Val9Val	c.27C>T	synonymous_variant
1570	55125272	rs1424357101	C	T	p.Ala8Thr	p.Ala8Thr	c.22G>A	missense_variant
1571	55125282	rs772252781	C	T	p.Lys4Lys	p.Lys4Lys	c.12G>A	synonymous_variant
1572	55125288	rs1187053033	C	G	p.Gln2His	p.Gln2His	c.6G>C	missense_variant
1573	55125289	rs1560526887	T	G	p.Gln2Pro	p.Gln2Pro	c.5A>C	missense_variant
1574	55125294	rs56233104	C	A	c.-1G>T		c.-1G>T	5_prime_UTR_variant
1575	55125299	rs771139989	A	C	c.-6T>G		c.-6T>G	5_prime_UTR_variant
1576	55125304	rs1235783869	G	A	c.-11C>T		c.-11C>T	5_prime_UTR_variant
1577	55125308	rs762847744	C	T	c.-15G>A		c.-15G>A	5_prime_UTR_variant
1578	55125309	rs369451909	G	A	c.-16C>T		c.-16C>T	5_prime_UTR_variant
1579	55125328	rs761653711	C	T	c.-35G>A		c.-35G>A	5_prime_UTR_variant
1580	55125329	rs767239103	G	A	c.-36C>T		c.-36C>T	5_prime_UTR_variant
1581	55125331	rs750077968	G	A	c.-38C>T		c.-38C>T	5_prime_UTR_variant
1582	55125333	rs755719986	G	A	c.-40C>T		c.-40C>T	5_prime_UTR_variant
1583	55125335	rs1318564870	C	T	c.-42G>A		c.-42G>A	5_prime_UTR_variant
1584	55125336	rs1216404471	G	A	c.-43C>T		c.-43C>T	5_prime_UTR_variant
1585	55125336		G	C	c.-43C>G		c.-43C>G	5_prime_UTR_variant
1586	55125337	rs575376068	G	A	c.-44C>T		c.-44C>T	5_prime_UTR_variant
1587	55125341		T	C	c.-48A>G		c.-48A>G	5_prime_UTR_variant
1588	55125343	rs114484350	T	C	c.-50A>G		c.-50A>G	5_prime_UTR_variant
1589	55125344		C	T	c.-51G>A		c.-51G>A	5_prime_UTR_variant
1590	55125345		T	C	c.-52A>G		c.-52A>G	5_prime_UTR_variant
1591	55125349		A	T	c.-56T>A		c.-56T>A	5_prime_UTR_variant
1592	55125351		C	A	c.-58G>T		c.-58G>T	5_prime_UTR_variant
1593	55125351	rs1445509672	CGCCTGTCTAGAGAAGGAG	C	c.-76_-59del		c.-76_-59del	5_prime_UTR_variant
1594	55125357		T	A	c.-64A>T		c.-64A>T	5_prime_UTR_variant
1595	55125357	rs1387690829	T	C	c.-64A>G		c.-64A>G	5_prime_UTR_variant
